# Supplementary material
Source: PubMed Central journal article supplement (PMC7858233)
Supplement: NIHMS1635248-supplement-1.pdf [file NIHMS1635248-supplement-1.pdf]

## **Supplementary Information for**

### **Intercontinental genomic parallelism in multiple three-spined stickleback adaptive radiations**

Isabel S. Magalhaes, James R. Whiting, Daniele D'Agostino, Paul A. Hohenlohe, Muayad Mahmud, Michael A. Bell, Skúli Skúlason and Andrew D.C. MacColl

Corresponding authors: Isabel Magalhaes and James Whiting

Email: [isabel.magalhaes@roehampton.ac.uk](mailto:isabel.magalhaes@roehampton.ac.uk)

Email: [jwhiting2315@googlemail.com](mailto:jwhiting2315@googlemail.com)

#### **This PDF file includes:**

Supporting Information and Supplementary Methods – pages 2 to 6

Supplementary Figs. 1 to 8 – pages 7 to 31

Supplementary Tables 1 to 14 – pages 32 to 70

Captions for Supplementary Datasets 1 to 3 – page 71

References for SI citations – pages 71-72

#### **Other supplementary materials for this manuscript include the following:**

Supplementary Datasets 1 to 3

### **Supplementary Information 1 - Windows based on genetic distance (0.1 cM) and recombination estimates**

Variable linkage across the genome moderates our ability to detect genomic associations with environmental/phenotypic variation by influencing linkage between sequenced and causative variants. Thus, our ability to detect associations is lower in a low-linkage window than a high-linkage window despite equal physical size of the windows. To assess whether this may influence our results, we estimated windows based on genetic distance, using a previously published genetic map (1). This approach is less-desirable than our physical distance windows because the genetic map itself has limited coverage within chromosomes and does not extend to unplaced scaffolds. However, it does allow us to assess how patterns of genomic parallelism may be driven by variable linkage in a subset of our original data. We chose to use windows of 0.1 cM as this gave us a broadly similar number of windows to our 50kb dataset.

Signals of parallelism for 0.1 cM windows were strongest for variables for which we similarly detected genomic parallelism with 50kb windows: calcium, pH, pelvic spine length, pelvis length, plate N and gill raker N all exhibited parallelism  $FDR < 0.001$ . Further, weakly significant genomic parallelism ( $FDR < 0.05$ ) was recovered for *Gyrodactylus* prevalence, salinity, zinc, dorsal spine 1 & 2 length and pelvis height. This suggests that our physical distance windows may be conservative estimates of parallelism.

0.1 cM windows also recovered several instances of higher order parallelism (parallelism in  $> 2$  radiations) than observed for 50kb windows. Two windows on chromosome 4 (46.3-46.4 cM; 42.6-42.7 cM) were found associated with zinc variation and plate N respectively in Alaska, BC and Iceland. A further window on chromosome 4 (44.2-44.3 cM) was associated with pelvis length in BC, Iceland and Scotland. This latter window likely corresponds to our three-way pelvis length window detected at 50kb resolution.

To estimate recombination for our 50kb windows, we overlapped recombination rate estimates between genetic markers in the map with our 50kb windows and took the weighted mean of overlapping recombination regions. Recombination was weighted according to the proportional coverage of each recombination interval within the 50kb window.

## Supplementary Information 2 - Marine x Freshwater (MxF) comparisons

We wanted to compare our freshwater results to well-studied genomic parallelism in marine x freshwater comparisons. This analysis had two aims: 1) to act as a positive control to assess our methods ability to detect regions of known genomic parallelism; 2) to compare the extent of freshwater parallelism to MxF parallelism. To this end, we compiled four additional SNP datasets. Each dataset included the freshwater populations for a specific radiation and additional genomic data from four marine populations sampled from each country (OBSM - Scotland; NYPS - Iceland; LICA - BC, MUD - Alaska). Thus, each dataset contained 23 (Alaska) or 22 (BC, Iceland, Scotland) populations. SNPs were called using stacks Populations program, with a map assigned to each dataset that denoted “marine” and “freshwater” populations. SNPs that were not present in both “marine” and “freshwater” populations were removed; SNPs present in <50% of individuals within either “marine” or “freshwater” were removed; SNPs with a minor allele frequency below 0.05 were removed; all SNPs per locus were retained; and data from the sex chromosome (XIX) were also removed. SNPs were output to VCF format with 24,416, 26,658, 21,089 and 20,605 SNPs retained in Alaska, BC, Iceland, and Scotland respectively.

To make the MxF analyses as comparable as possible to our intra-radiation analyses, we used Bayenv2 in the same way. To generate Bayesfactors and Spearman’s  $\rho$ , we calculated allele frequencies within each of the 23 or 22 populations and assigned marine populations “1” and freshwater populations “-1” in the environment input file. Covariance matrices were calculated using a subset of each SNP dataset pruned for linkage and averaged over 10 independent runs. Bayenv2 was run over each SNP for 100,000 MCMC iterations with results averaged over 10 independent runs. Outliers were determined using the methods used for intra-radiation analyses, and all downstream analyses were run in the same way. To recap, outlier SNPs were determined as having  $\log_{10}(\text{Bayesfactors}) > 1.5$  and Spearman’s  $\rho$  values above the 0.95 quantile. Outlier windows were determined as those that contained more outlier SNPs than a 99% binomial expectation given the number of SNPs in that window. Outlier windows were overlapped, and significance was determined by comparing observed overlap to a null distribution of random overlap over 10,000 permutations. In total, we detected 91 (Alaska), 34 (BC), 30 (Iceland) and 29 (Scotland) 50kb outlier windows, which represented 1.07%, 0.40%, 0.35% and 0.34% of windows that contained SNPs.

For 50kb windows, one window (groupXX:8950000-9000000; FDR = 0.0003) was found to overlap in all four MxF datasets, and three overlapped in Alaska, Iceland and Scotland (groupI:21600000-21650000; groupI:21750000-21800000; groupIV:12800000-12850000; FDR < 0.0001). In pairwise comparisons, overlap was greatest for Alaska and BC ( $N_{\text{windows}} = 8$ ; FDR < 0.0001), followed by Iceland and Scotland ( $N_{\text{windows}} = 5$ ; FDR < 0.0001), Alaska and Iceland ( $N_{\text{windows}} = 2$ ; FDR = 0.08), Alaska and Scotland ( $N_{\text{windows}} = 1$ ; FDR = 0.409), BC and Iceland ( $N_{\text{windows}} = 1$ ; FDR = 0.204), and no windows overlapped in BC and Scotland.

## Supplementary methods:

### Sampling and environmental data collection.

Fish were collected by setting between 10 and 30 unbaited minnow traps (Gee traps, Dynamic Aqua, Vancouver, Canada) in water approximately 0.3–3m deep, within 5 m of shore along a 100–400m stretch of shoreline. The fish were haphazardly selected with individuals of all sizes, sex and breeding condition collected (see Supplementary Table S17 for details of sex of each fish collected).

We chose environmental variables that were likely to cause natural selection on the fish and could be precisely measured. For abiotic environmental variables we chose pH, calcium (Ca), sodium (Na) zinc (Zn) and lake area, which have been associated previously with the evolution of body shape, size and armour in stickleback (2, 3, 4). We measured the pH of each lake using a calibrated pH meter (Multi 340i, WTW, Weilheim, Germany). The concentrations of metallic cation concentrations sodium (“Na”), calcium (“Ca”) and zinc (“Zn”) were obtained by collecting a filtered water sample acidified with 2% nitric acid in the field from each lake. These samples were then analysed at the Division of Agriculture & Environmental Science at the University of Nottingham for metallic cation concentrations by inductively coupled plasma mass spectrometry (ICP-MS) and anions using a Dionex DX500 ion chromatograph with an IonPac AS14A (4 x 250 mm). Lake area was estimated using the polygon function in Google Earth.

Many biotic variables are difficult to quantify precisely so we used the prevalence of two parasites *Gyrodactylus* sp. (ectoparasitic trematodes) and *Schistocephalus solidus* (endoparasitic cestode) that are likely to have a significant impact on the reproduction and life cycle of stickleback (5, 6, 7). The prevalence of *Gyrodactylus spp.* and *Schistocephalus solidus* per fish were counted during dissections and parasite numbers were averaged by lake. Concentrations of cations, pH and parasite prevalence per lake are shown in Supplementary Table S2.

### Phenotypic data collection.

The 12 phenotypic traits are all known to have undergone major changes as result of the migration of sticklebacks from marine to freshwater habitats (8) and are known to be highly variable between freshwater populations (4).

All morphological measurements and analyses were done using the left side of the fish. To quantify body shape variation across individuals and lakes we digitized 13 homologous landmarks (n=16) using the TPS software package (8, 9, 10). Landmark coordinates for 1298 individuals were exported, and analyzed using MORPHOJ 1.03 (12). Briefly, we first performed a Procrustes superimposition to extract shape coordinates for further analyses (13, 14). For each radiation separately, we then performed a size correction to account for any allometric effects (15, 16) using multivariate regressions of Procrustes coordinates against the logarithm of centroid size and tested its significance using a permutation test against the null hypothesis of independence (10 000 iterations).

Using photographs of the left side of alizarin-stained individual fish we measured the following body armour and spines traits: number of armour plates (“Plate\_N”), length of 1<sup>st</sup> dorsal spine (“DS1”) and 2<sup>nd</sup> dorsal spine (“DS2”), length of biggest armour plate

("BAP"), pelvic spine length ("PS"), length of the horizontal process of the pelvis ("LP") and height of the ascending process of the pelvis ("HP") (30). The first gill arch from at least three fish per population (mean = 13.8) was removed and photographed at 10x magnification under a graticule. The total number of gill rakers ("Gill\_Raker\_N") was then counted from the photograph, and the three longest rakers measured to give an average 'gill raker length' ("Gill\_Raker\_L"). As all traits, apart from number of plates, were significantly correlated with SL (results not shown), we size corrected the data by regressing each trait against SL (all individuals from all lakes pooled) and used the residuals in further analyses.

### **DNA extractions, RAD library preparation and sequencing.**

In 2014 we conducted RAD sequencing on samples from Scotland and from Iceland. Sequencing libraries were prepared and processed into RAD following the modified libraries according to (17), using the restriction enzyme SbfI-HF (NEB), which digests DNA at an 8bp recognition sequence and is expected to cut roughly 22,000 locations across the stickleback genome. Each sample was individually ligated to adaptors with 6bp in-line barcodes and multiplexed in libraries of 192. We sequenced these RAD libraries in four lanes on an Illumina HiSeq sequencer at the University of Oregon, producing 100-bp single-end reads.

In 2016 we conducted RAD sequencing on samples from British Columbia and from Alaska. Sequencing libraries were prepared following the modified single-digest RAD protocol of (16), using the restriction enzyme SbfI. Each sample was individually labelled using one of 96 unique 8bp barcodes, and each pool of 96 samples received a different 8bp inline index using the NEBNext Ultra DNA Library Prep Kit for Illumina (18). We sequenced these RAD libraries in two lanes of Illumina NextSeq high-output sequencing at the University of Oregon, using paired-end 75bp reads. After filtering for the presence of a correct index, barcode, and SbfI cut site, these two lanes of sequencing produced a total of 256 million and 267 million read pairs, respectively.

### **Population genetics statistics.**

The retained reads were aligned to the three-spined stickleback reference genome (version BROADs1, Ensembl release 82) using GSnap (19). Reference mapping with GSnap took sequence quality information into account, allowed for up to five mismatches and up to 2 indels between each read and the reference sequence and ignored reads that mapped against more than a single position in the genome. The STACKS pipeline was used to analyse mapping files and population genetics statistics were calculated using the POPULATIONS program in Stacks. POPULATIONS was run independently for each radiation with the following filters applied: SNPs that were present in less than 8 populations were removed; SNPs present in <50% of individuals within a population were removed; SNPs with a minor allele frequency below 0.05 were removed; all SNPs within a locus were retained; and data from the sex chromosome (XIX) were also removed. These filters were chosen to maximise SNP count whilst still providing enough information for allele frequencies and environmental and phenotypic variables to be correlated. After filtering we retained 26,990, 26,937, 29,111, 26,169 SNPs within a GENEPOP formatted output for Scotland, Iceland, British Columbia and Alaska,

respectively. GENEPOP files were converted to BAYENV2 format using PGDSpider2 (20).

### **Permutations for genomic parallelism**

We quantified genomic parallelism associated with individual variables by carrying out randomised permutations (akin to  $\chi^2$ , but avoiding Poisson assumptions) with the expectation that all of the windows to which our (environmentally and phenotypically associated) SNPs mapped had an equal probability of being associated with environmental or phenotypic variables, assuming independence between windows. Whilst the latter is technically untrue, non-independence should be minimal at window sizes of 50Kb or greater given linkage disequilibrium in the stickleback genome. Results were also consistent at larger window sizes (up to 100 kb) where non-independence is further minimised but traded-off against signal.

**Supplementary Fig. 1.** Three-dimensional plot of the PCA on 8,395 SNPs for 1,304 individuals.

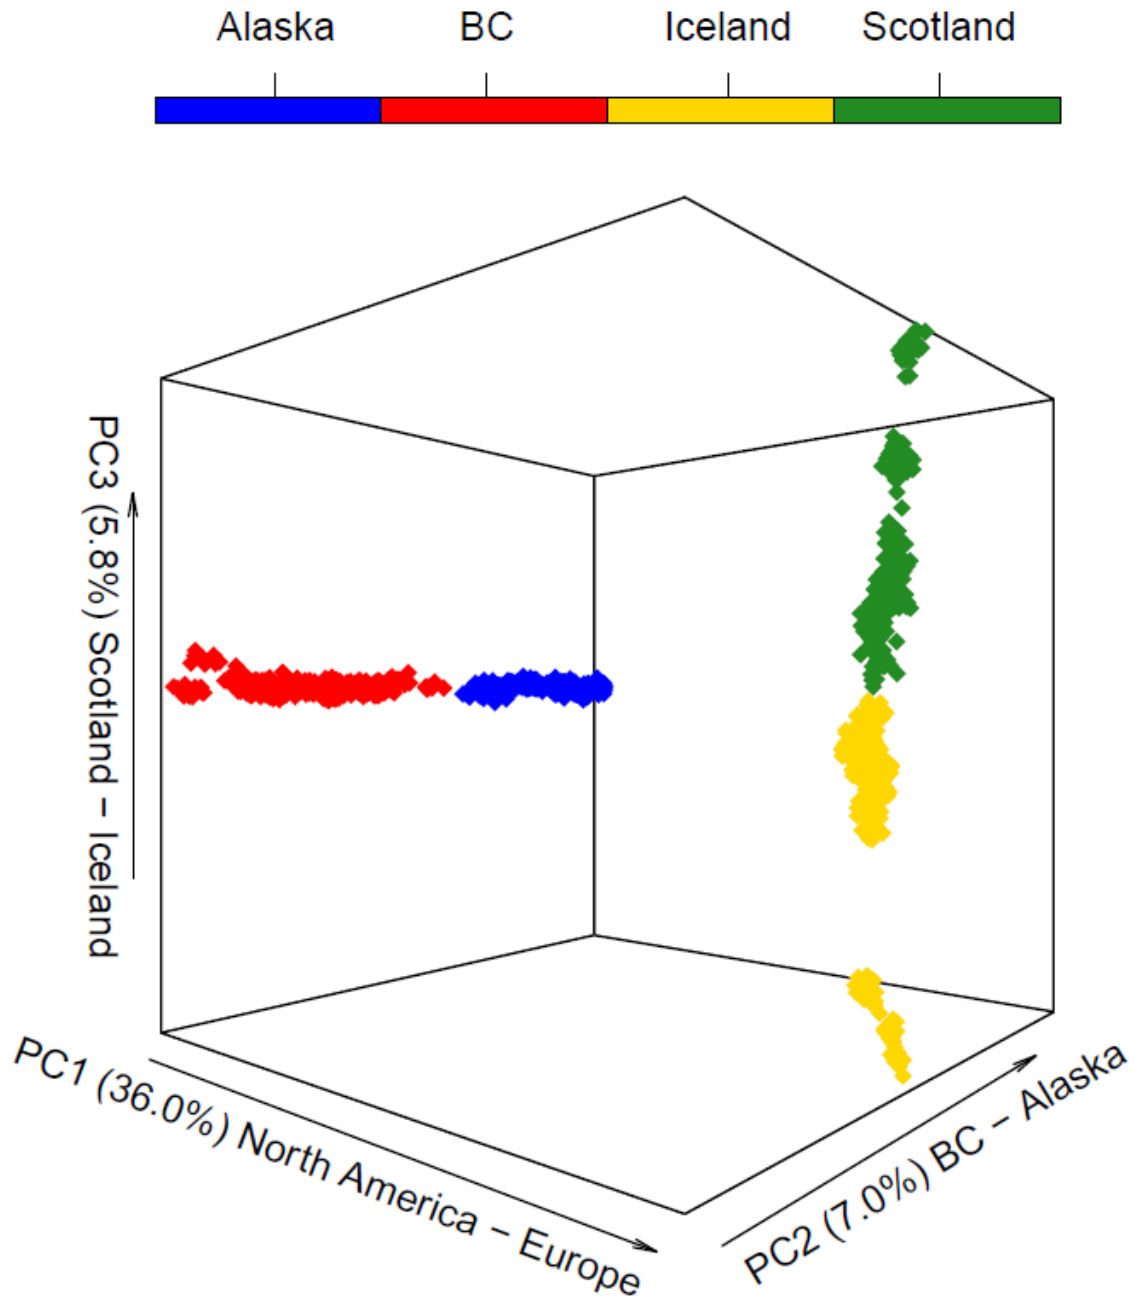

**Supplementary Fig. 2.** Distribution of shared polymorphic sites among the four adaptive radiations. Bars along the top denote the number of shared polymorphic sites within each intersection of the four groups. Below the bars, the intersection is defined as filled points. Bars are ordered according to: singular polymorphic sites (not shared), sites shared in two radiations, sites shared in three radiations, and sites shared in all four radiations.

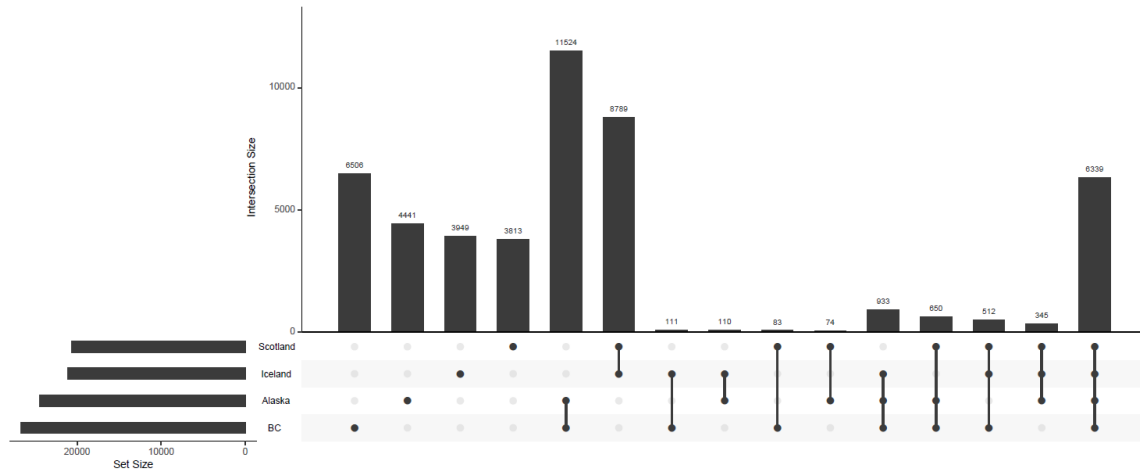



**Supplementary Fig. 3.** Expected and observed counts of 50kb windows containing an above 99% binomial expectation number of SNPs associated environmental variables and phenotypic traits in at least 2 radiations with permutation tests restricted exclusively to Alaska/BC and Iceland/Scotland pairings. Expected bars (grey) represent mean counts across 10,000 simulated outcomes with 95% confidence intervals per a one-tailed hypothesis. Asterisks denote significance of FDR-corrected one-tailed tests between the observed counts and the 100,000 simulated counts at the <0.05 (\*), <0.01 (\*\*) and <0.001 (\*\*\*) levels.

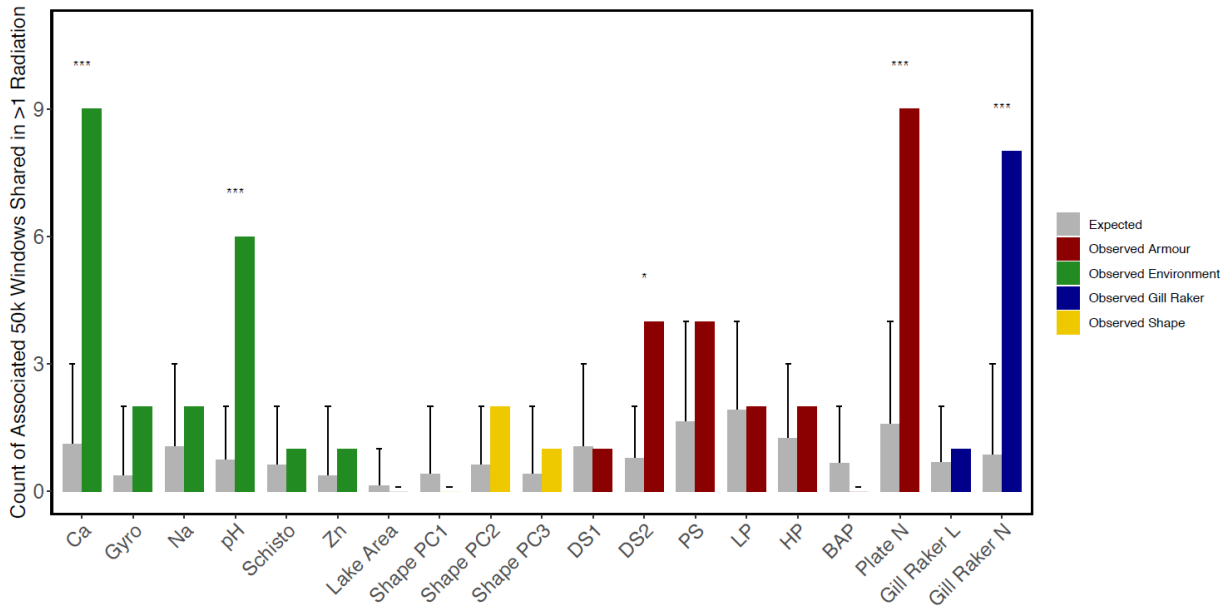

**Supplementary Fig. 4.** Recombination for all windows, classified as non-associated ('Neutral'), environmentally or phenotypically associated ('Outlier'), or parallel across radiations ('Overlap'). Pairwise wilcoxon tests are shown between all violins ( $p > 0.05 =$  NS;  $p < 0.001 =$  \*\*\*).

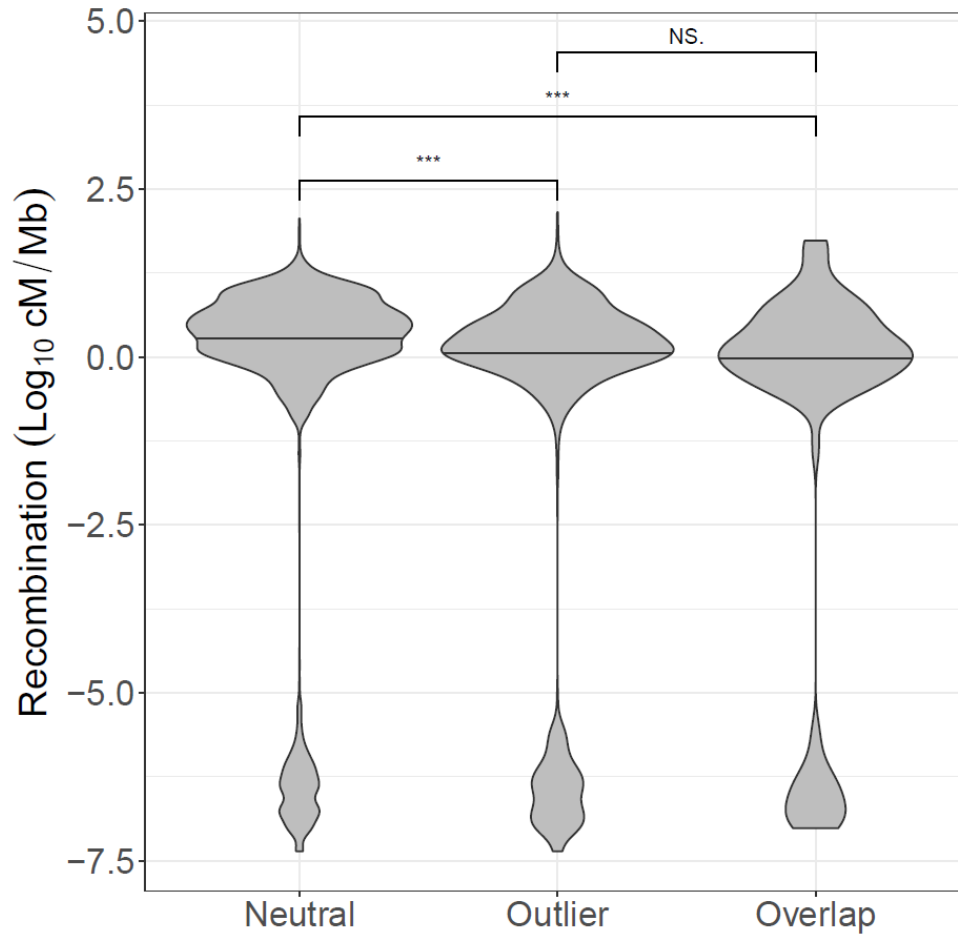

**Supplementary Fig. 5.** Expected and observed counts of 0.1cM windows containing an above 99% binomial expectation number of SNPs associated with environmental variables and phenotypic traits in at least 2 radiations. Expected bars represent mean counts across 10,000 simulated outcomes with 95% confidence intervals per a one-tailed hypothesis. Asterisks denote significance of FDR-corrected one-tailed tests between the observed counts and the 100,000 simulated counts at the <0.05 (\*), <0.01 (\*\*), and <0.001 (\*\*\*) levels.

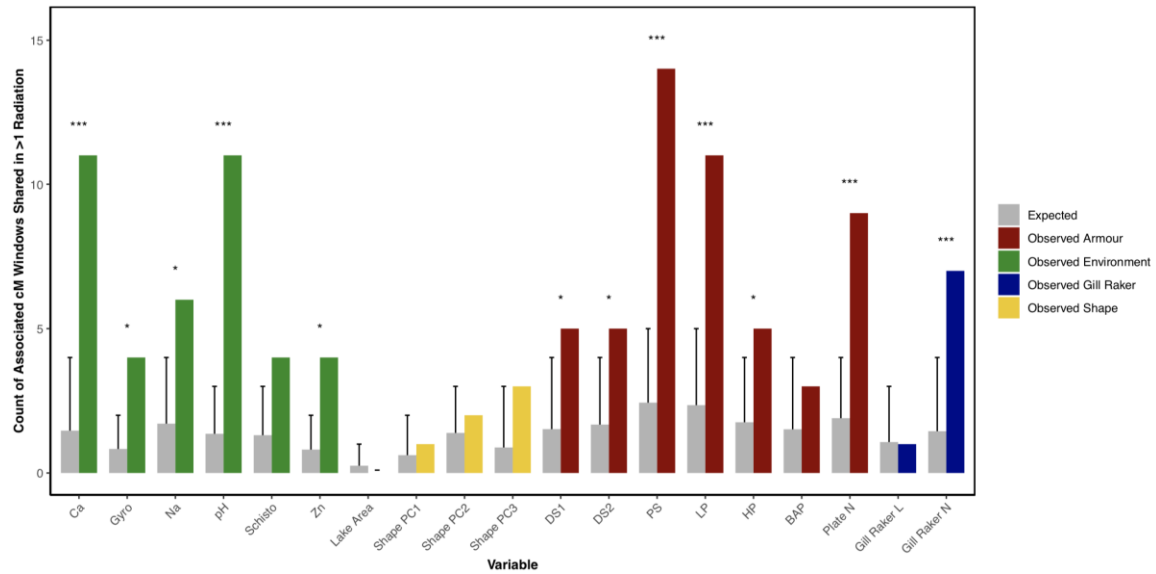

**Supplementary Fig. 6.** Manhattan plots summarizing correlations of allele frequency with all environmental variables and phenotypic traits. Bars show residual associated SNPs above the 99% binomial expectation. Parallel windows are highlighted as circles (associated in 2 radiations) or triangles (associated in 3 radiations).

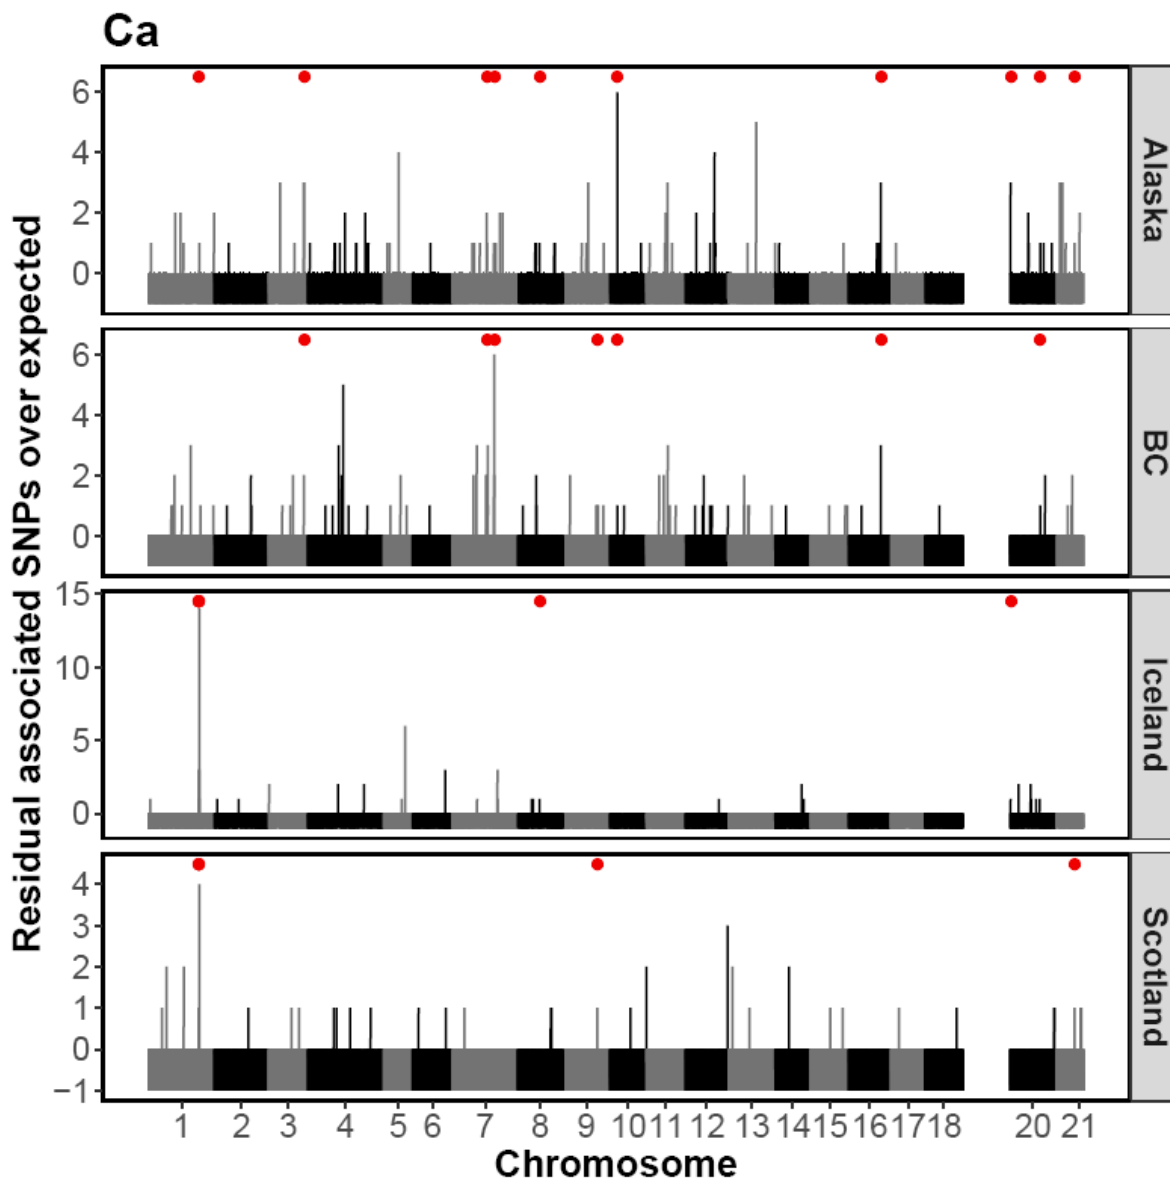

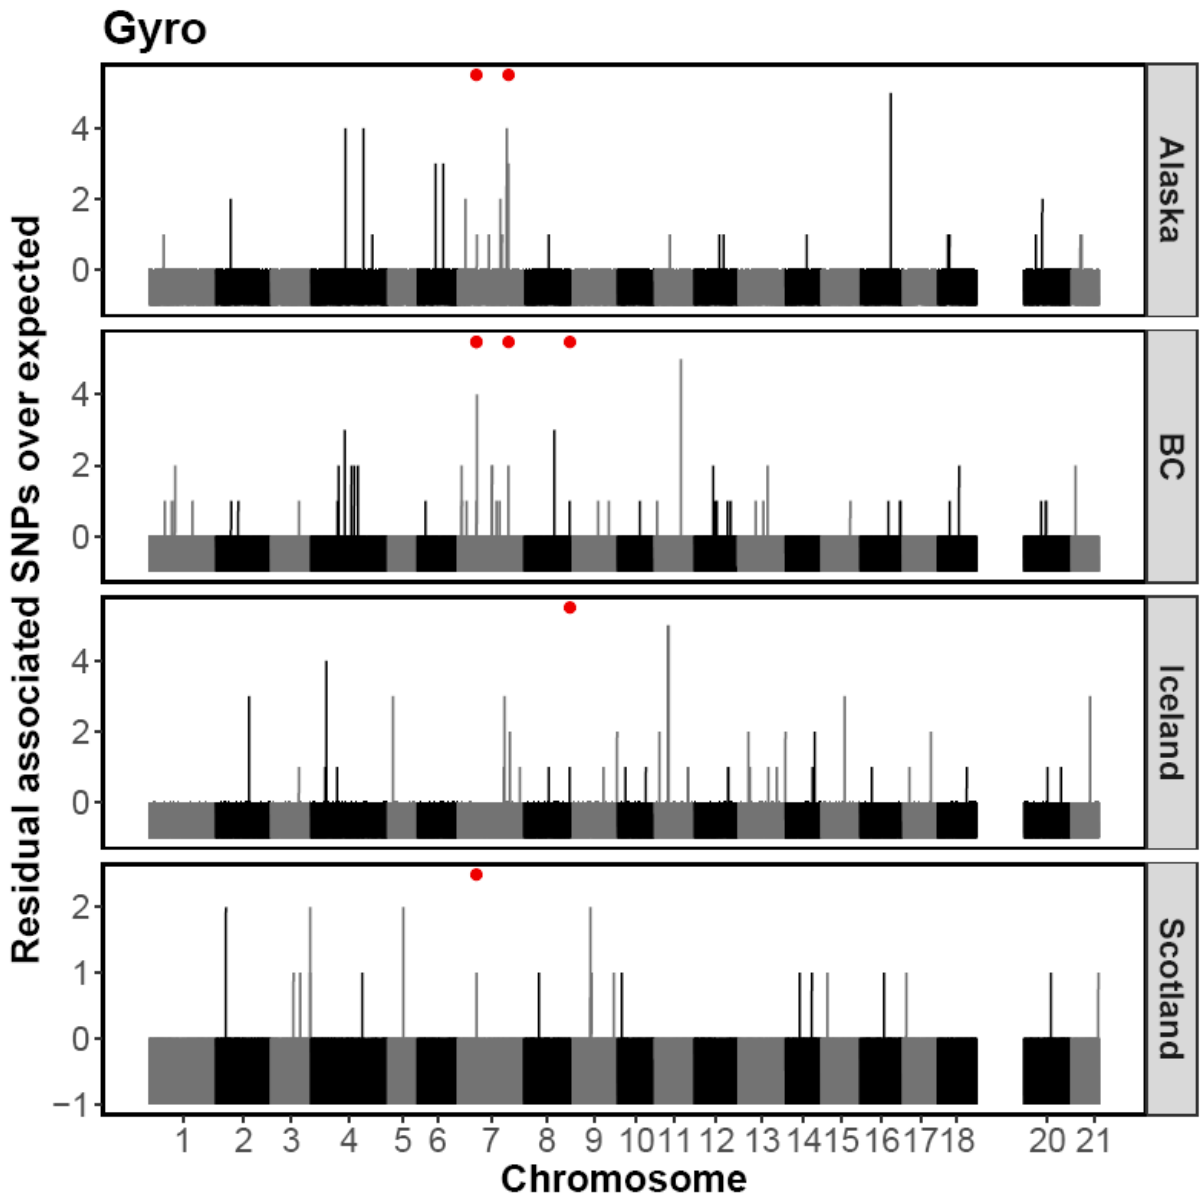

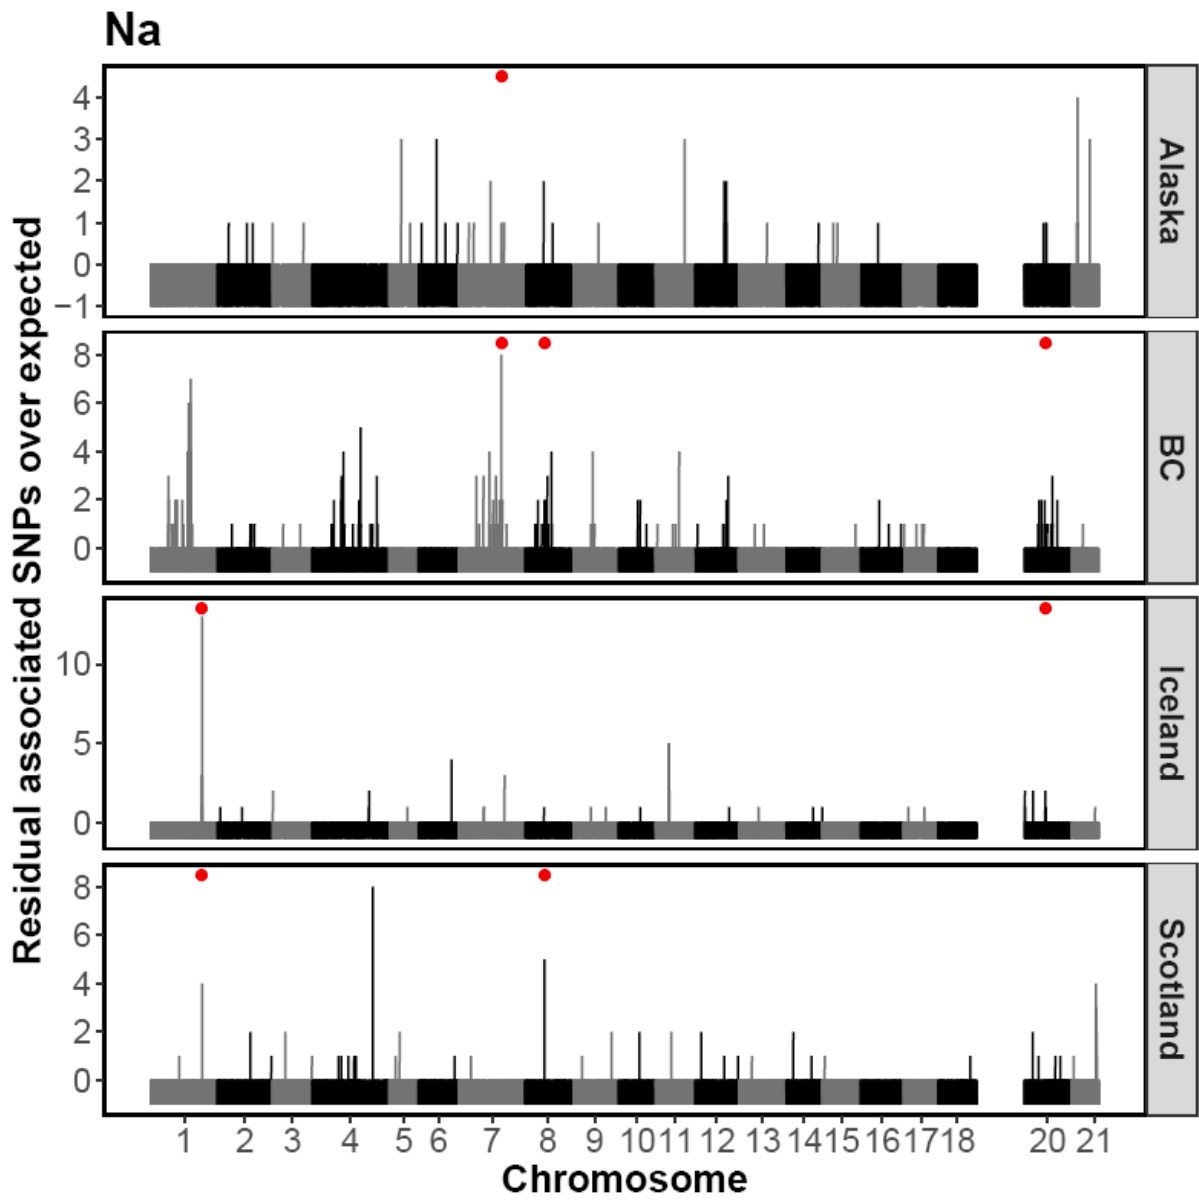

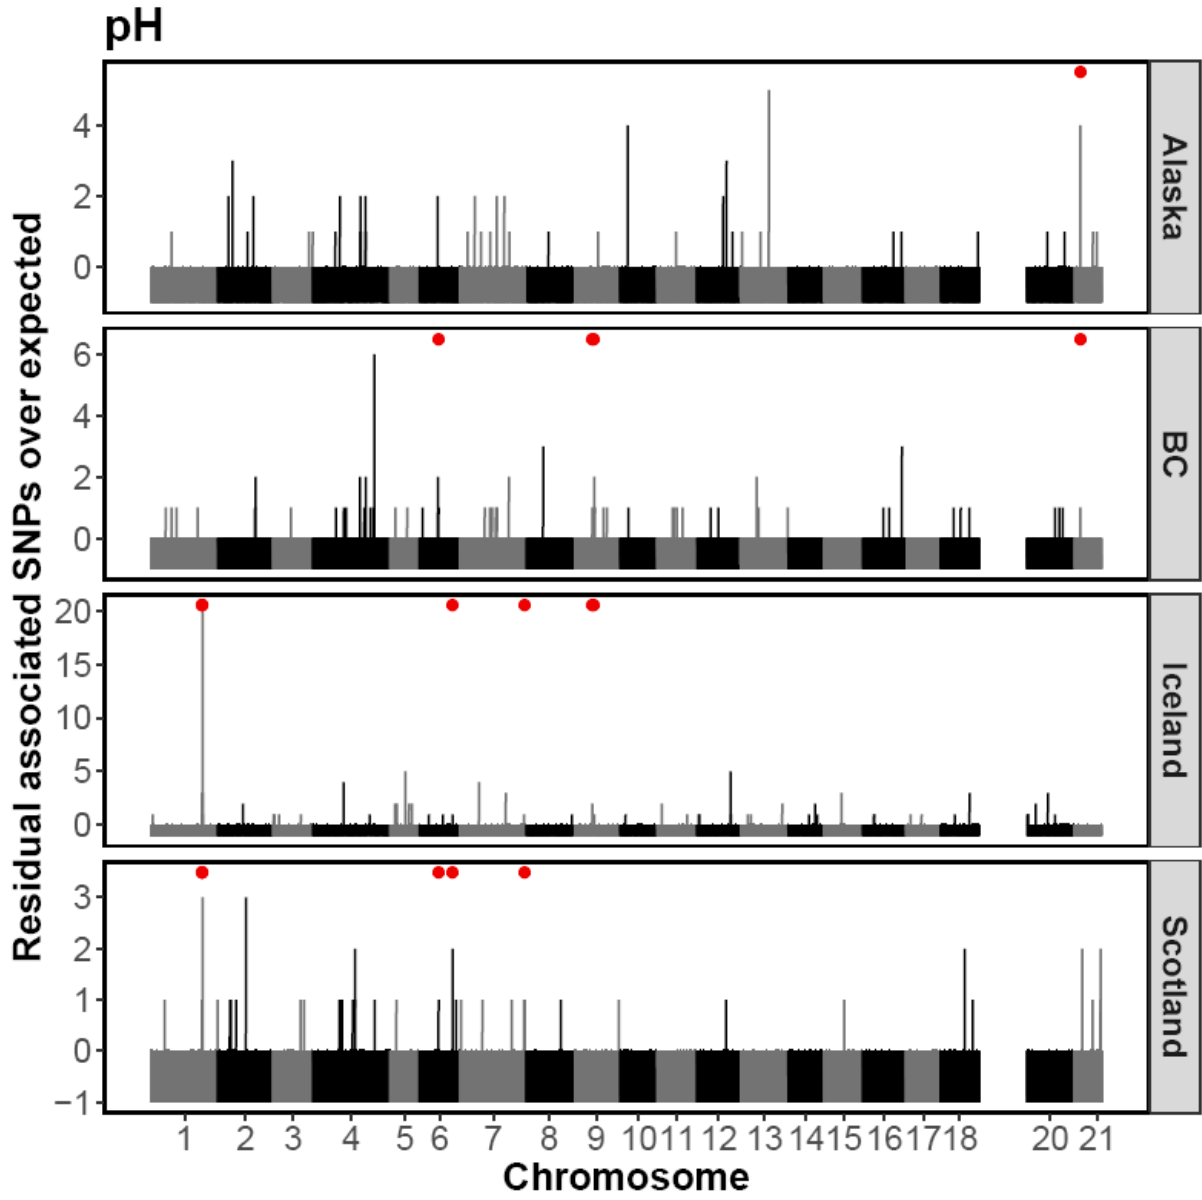

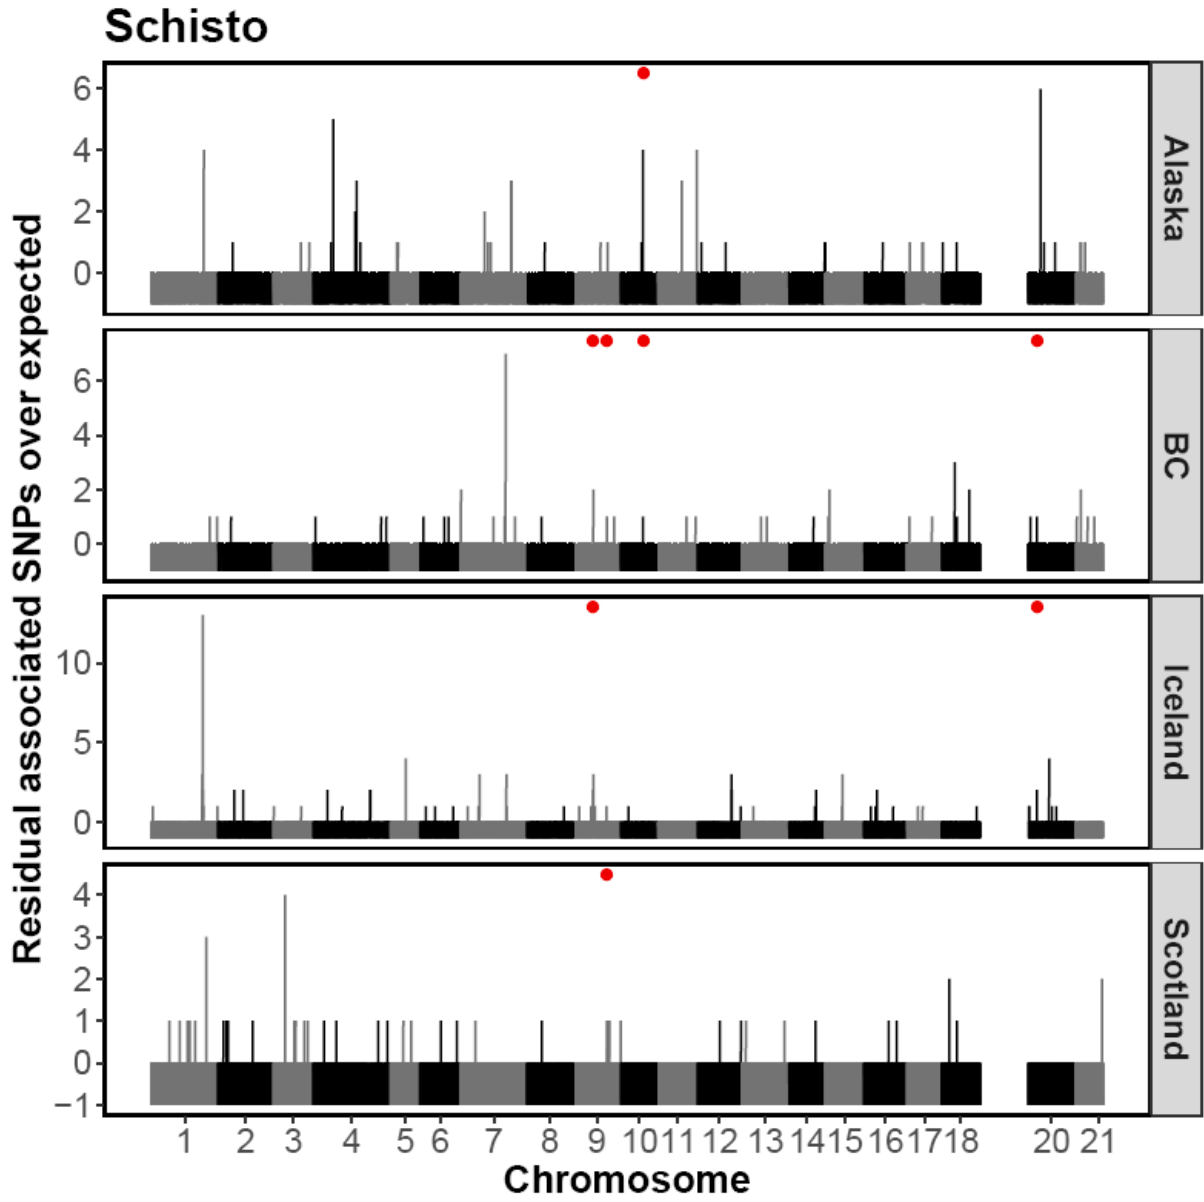



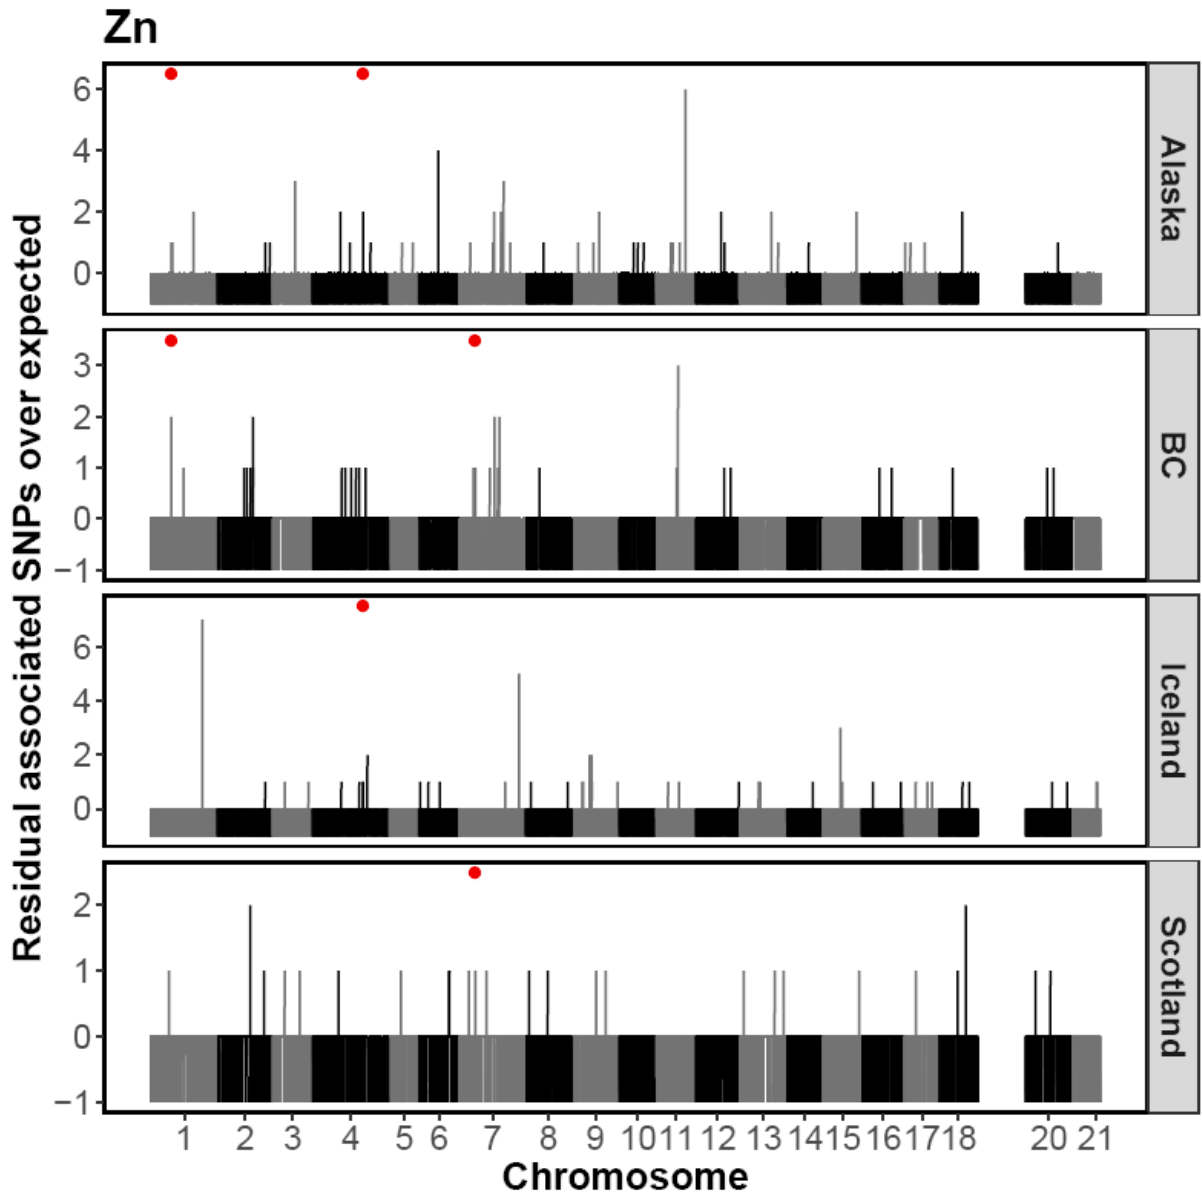

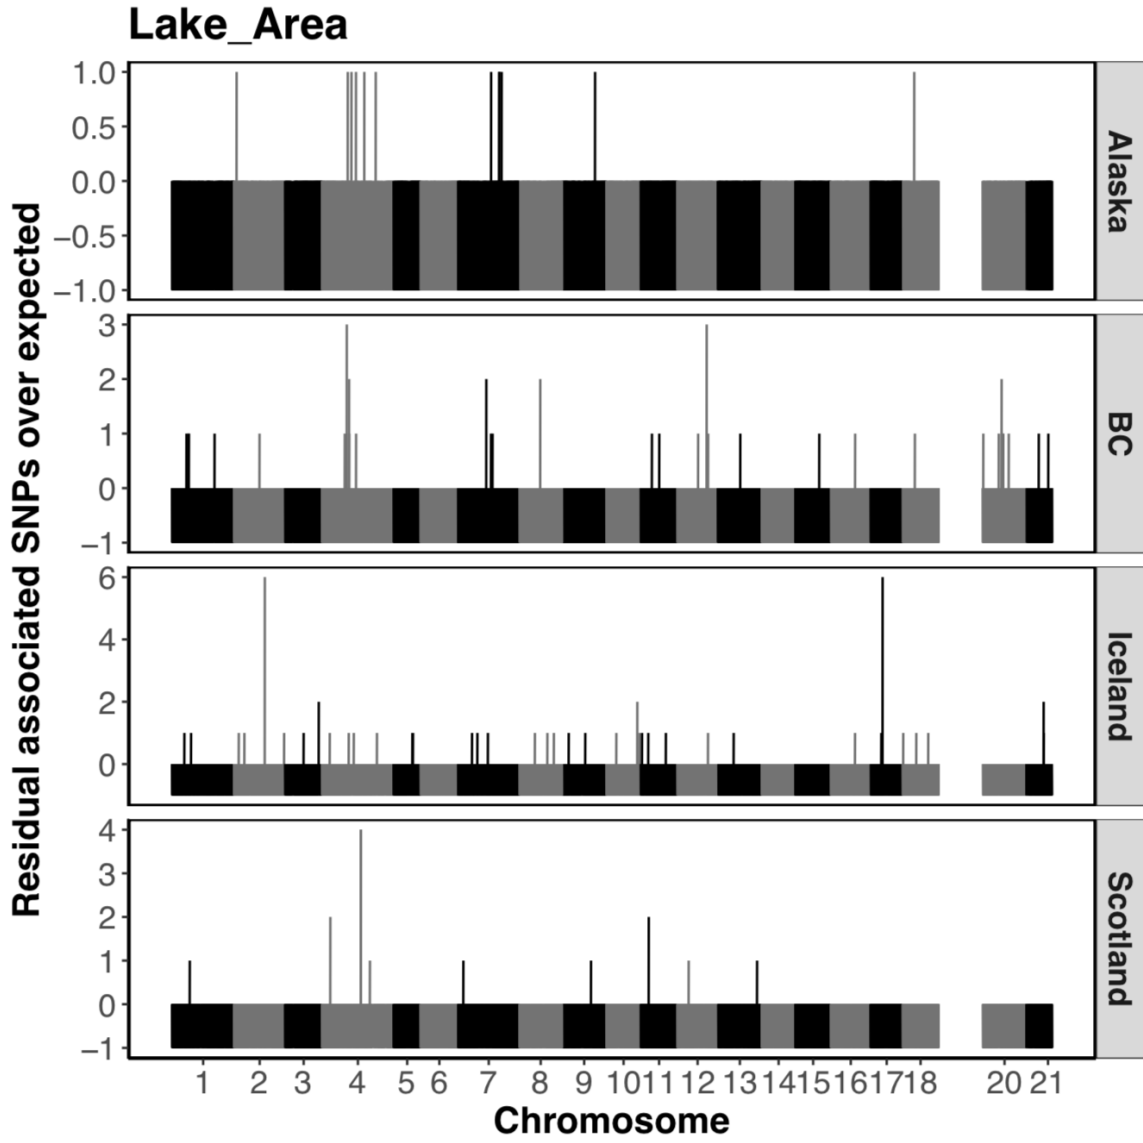

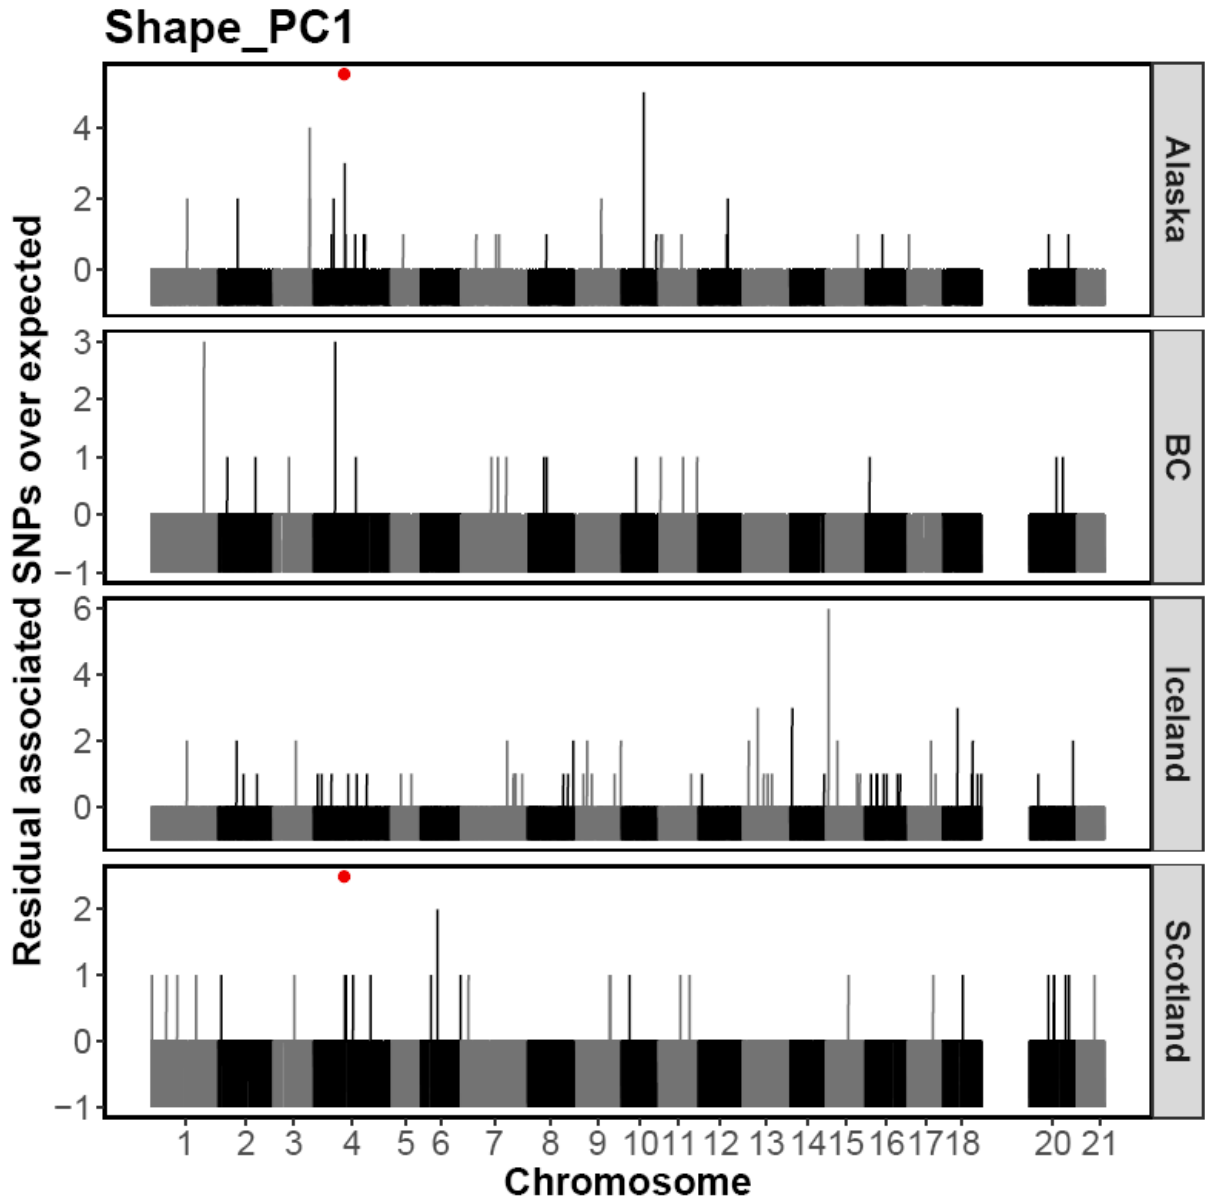

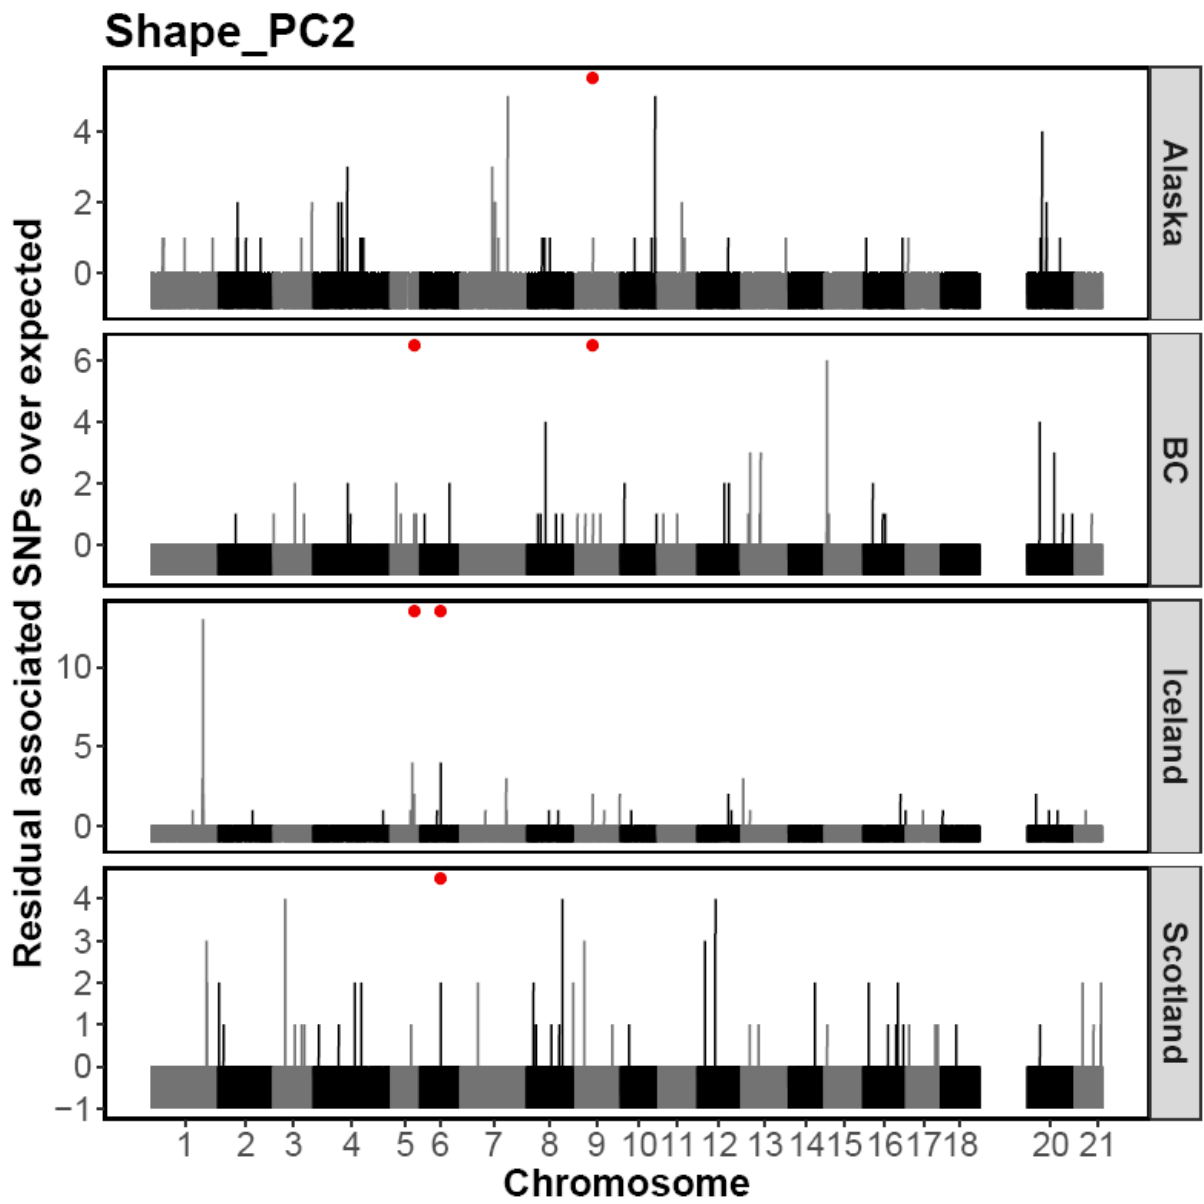

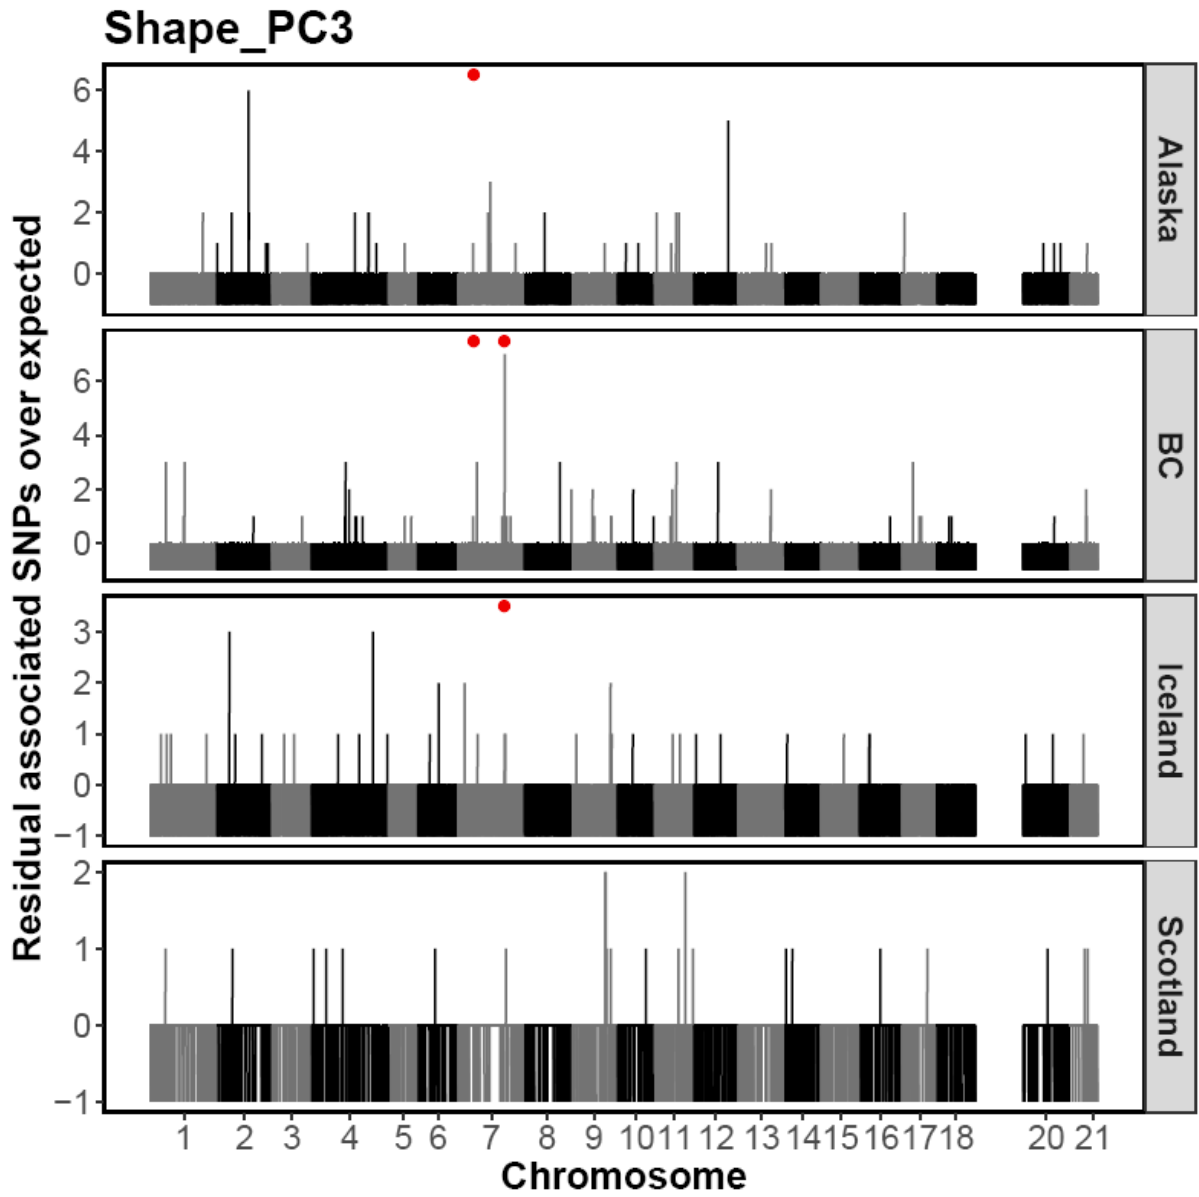

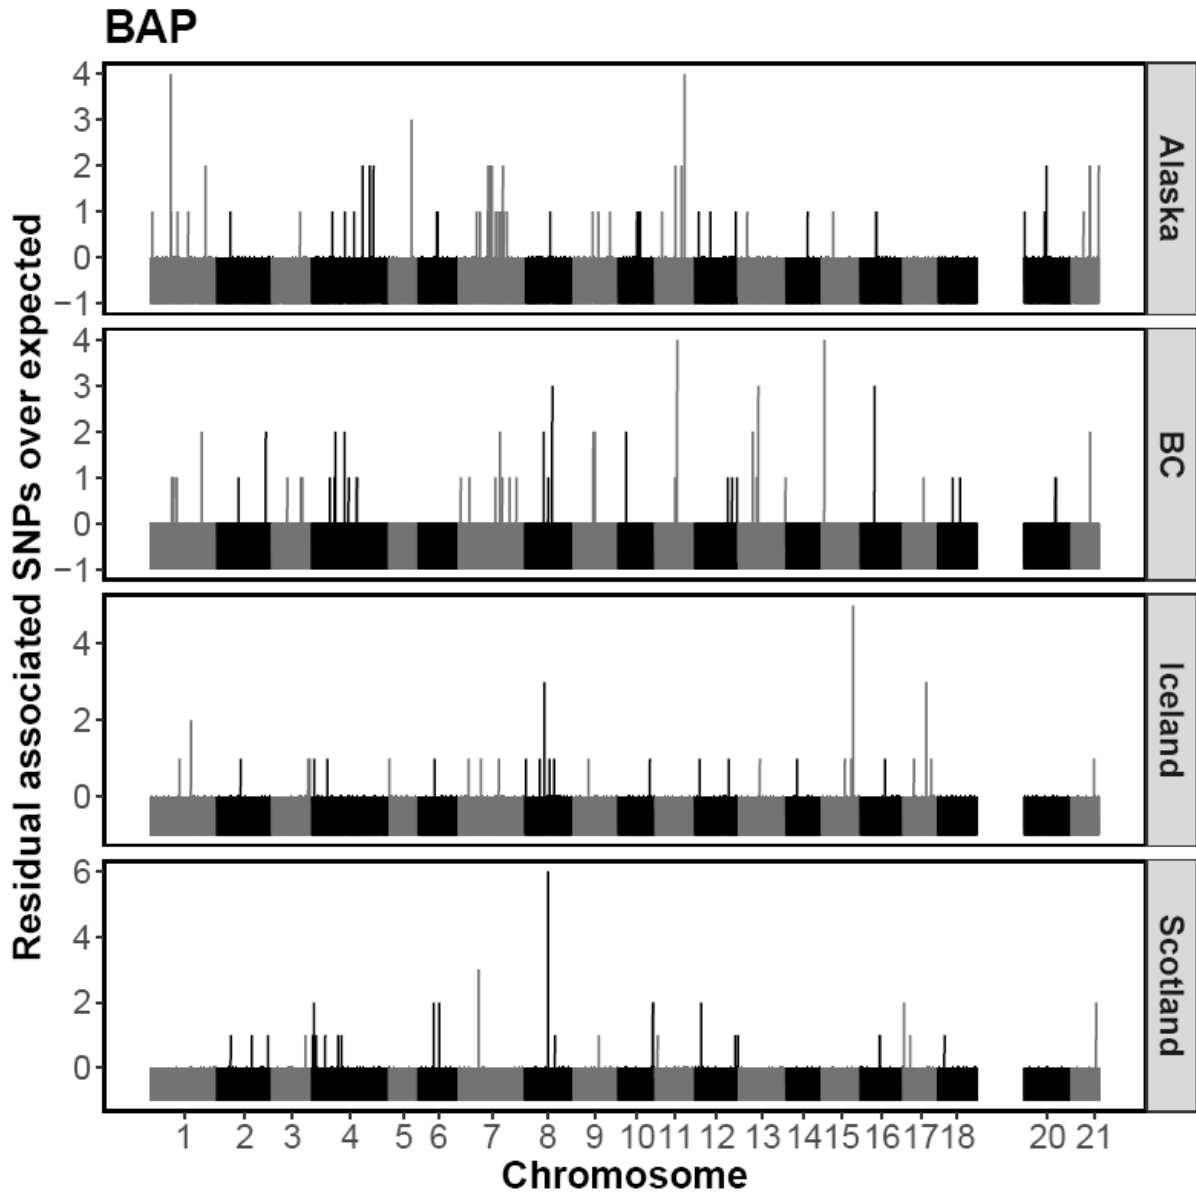

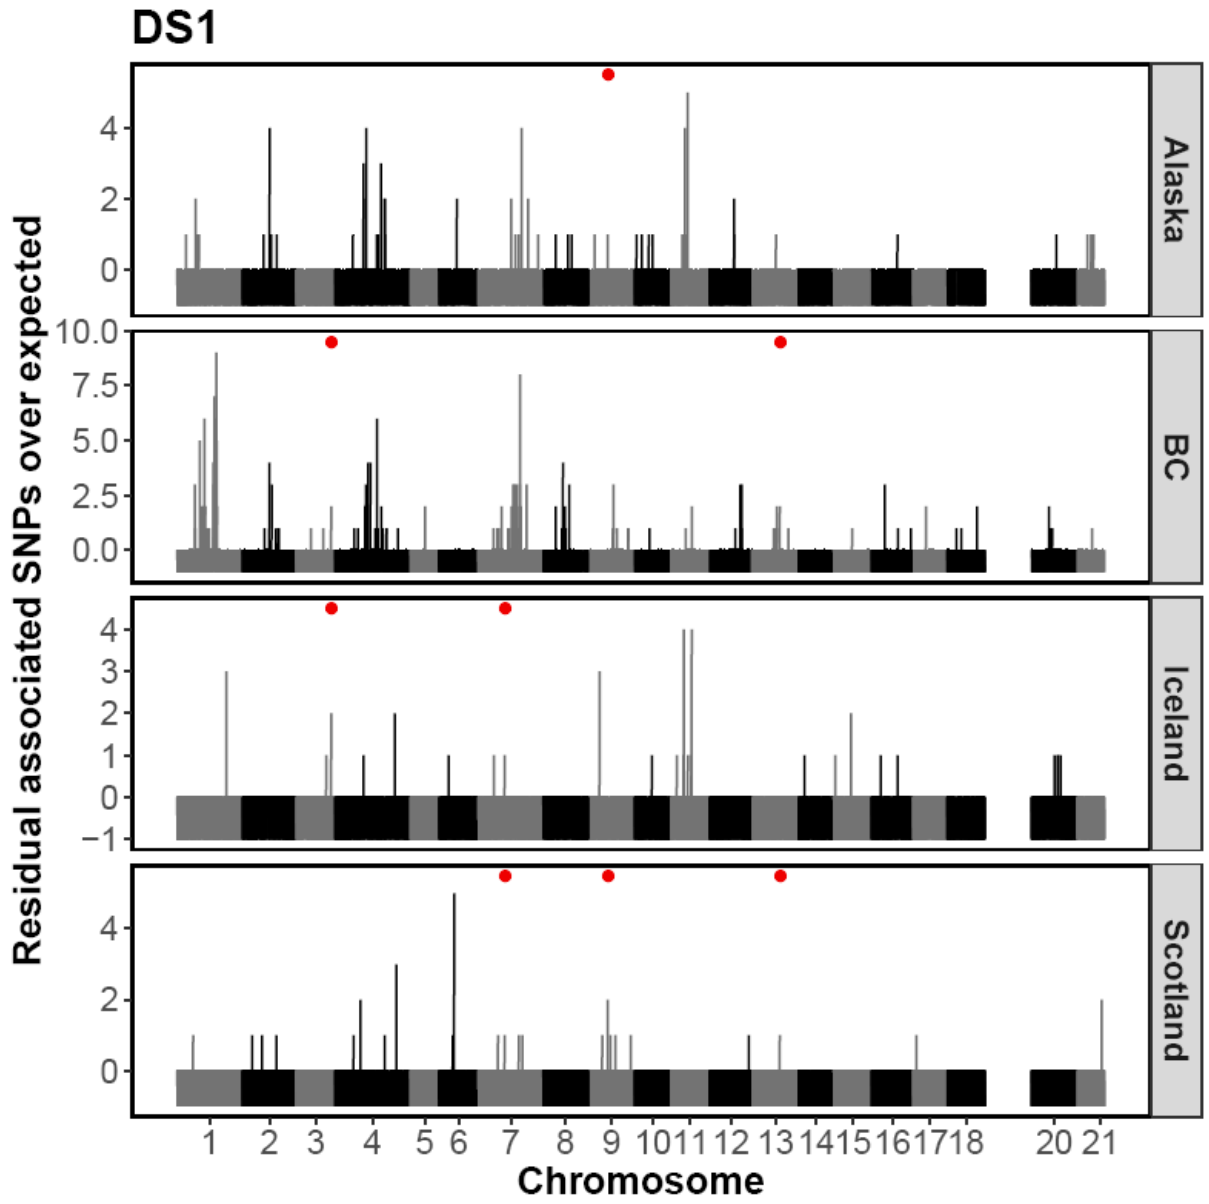

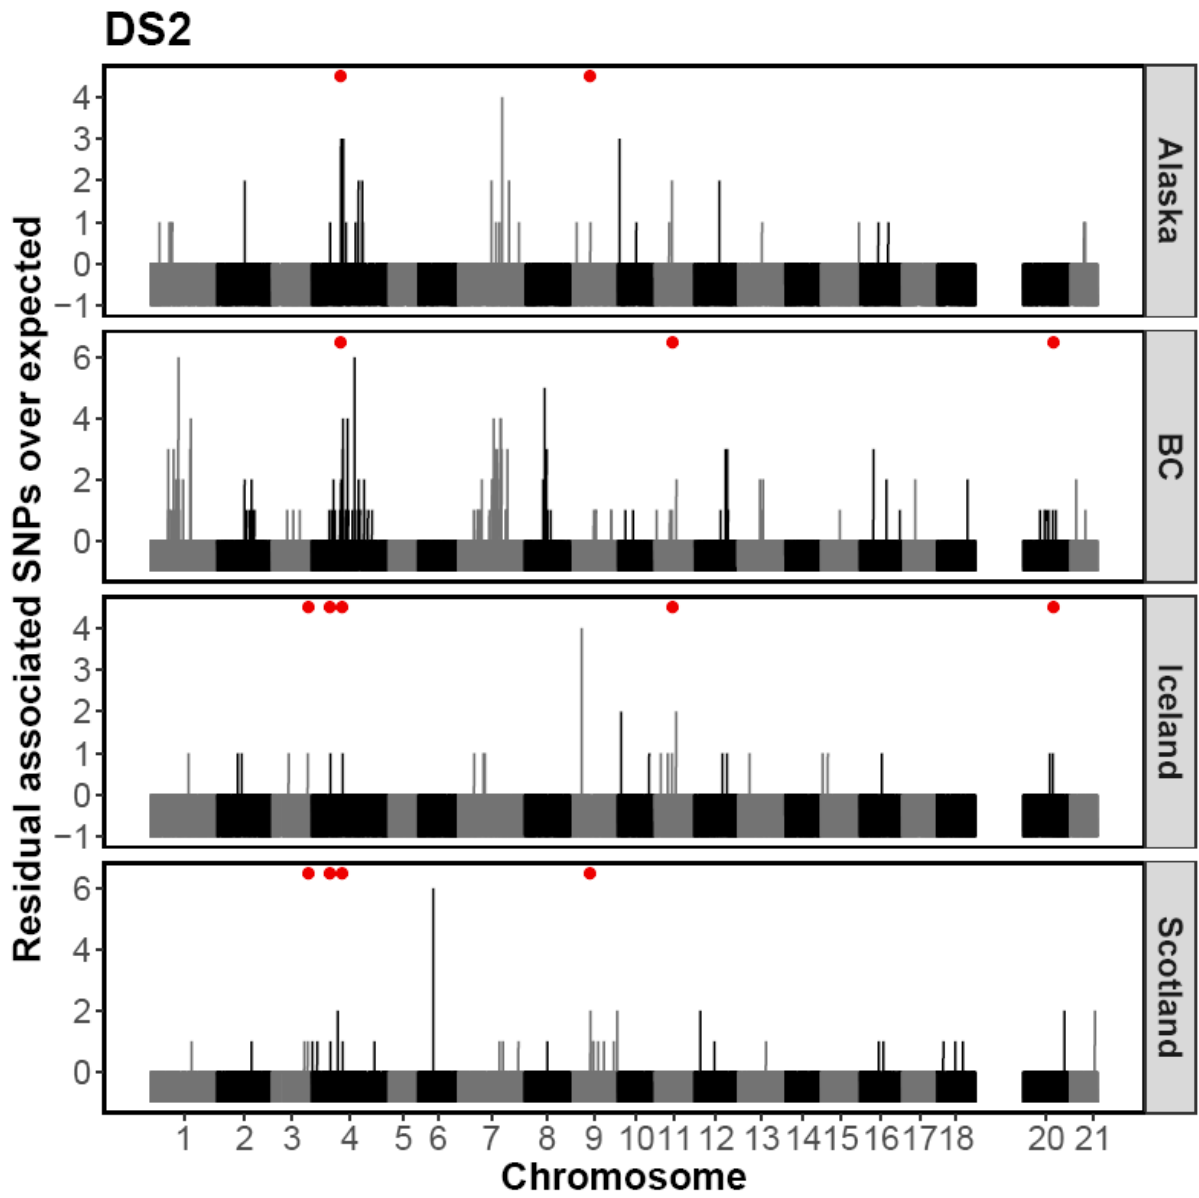



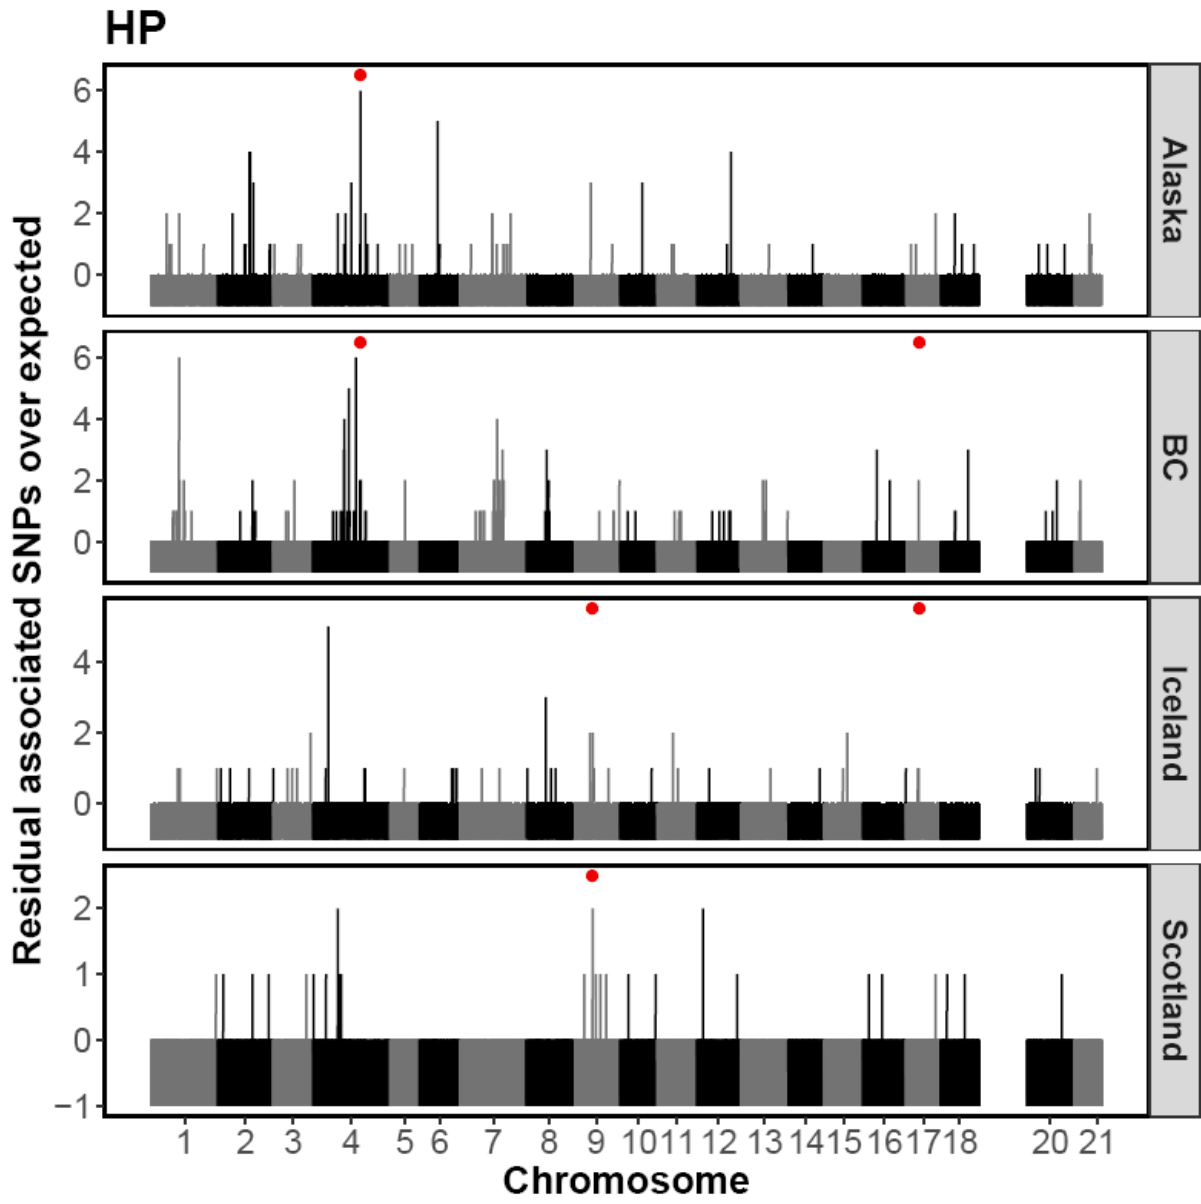

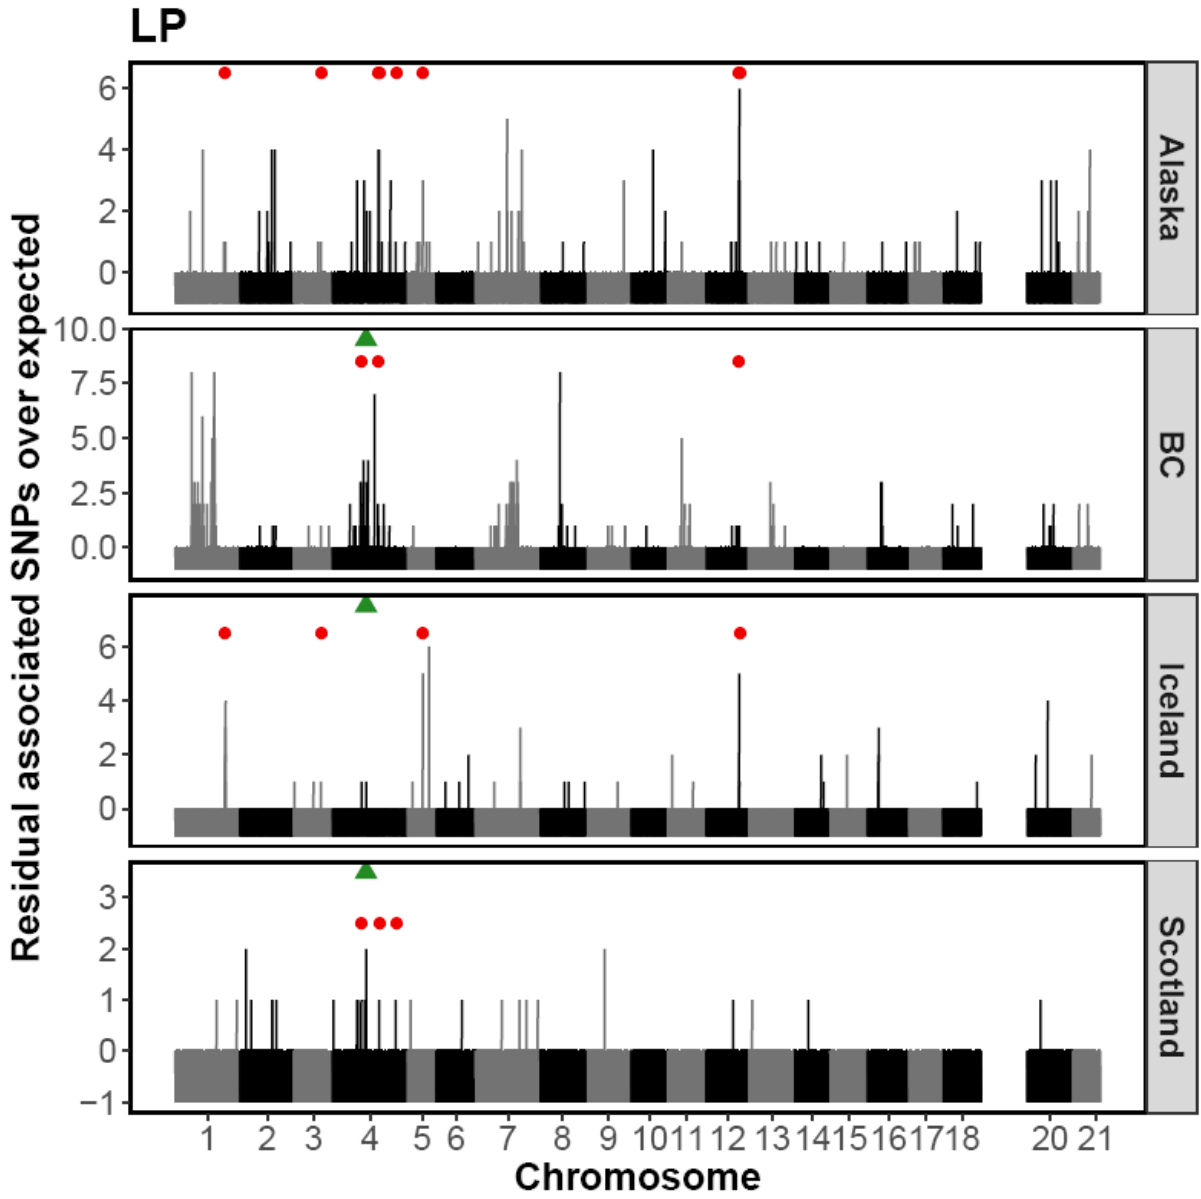

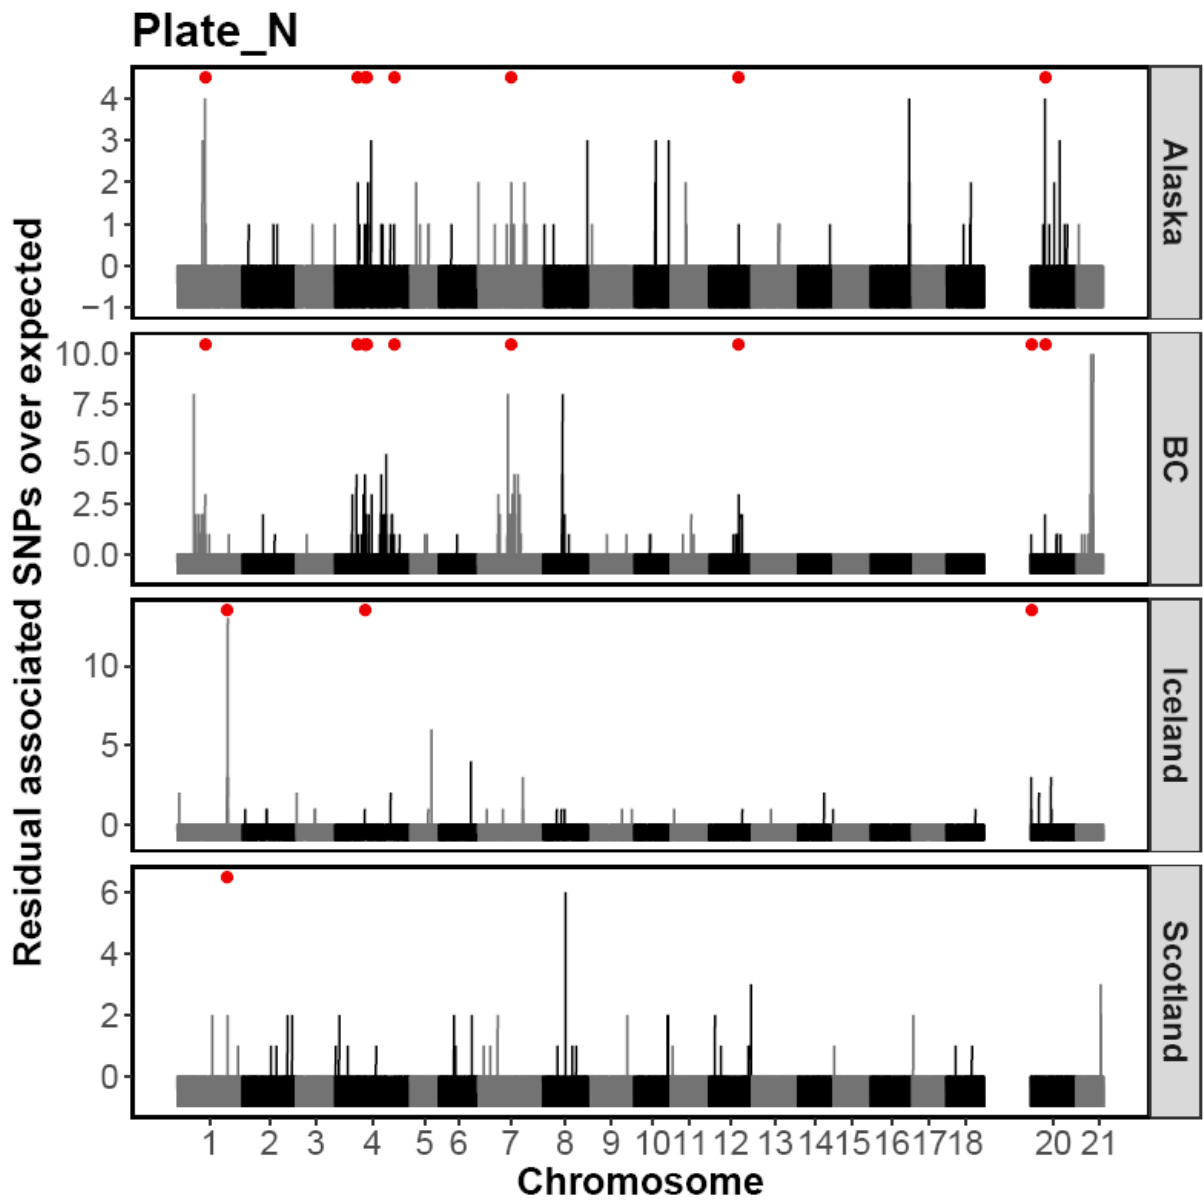

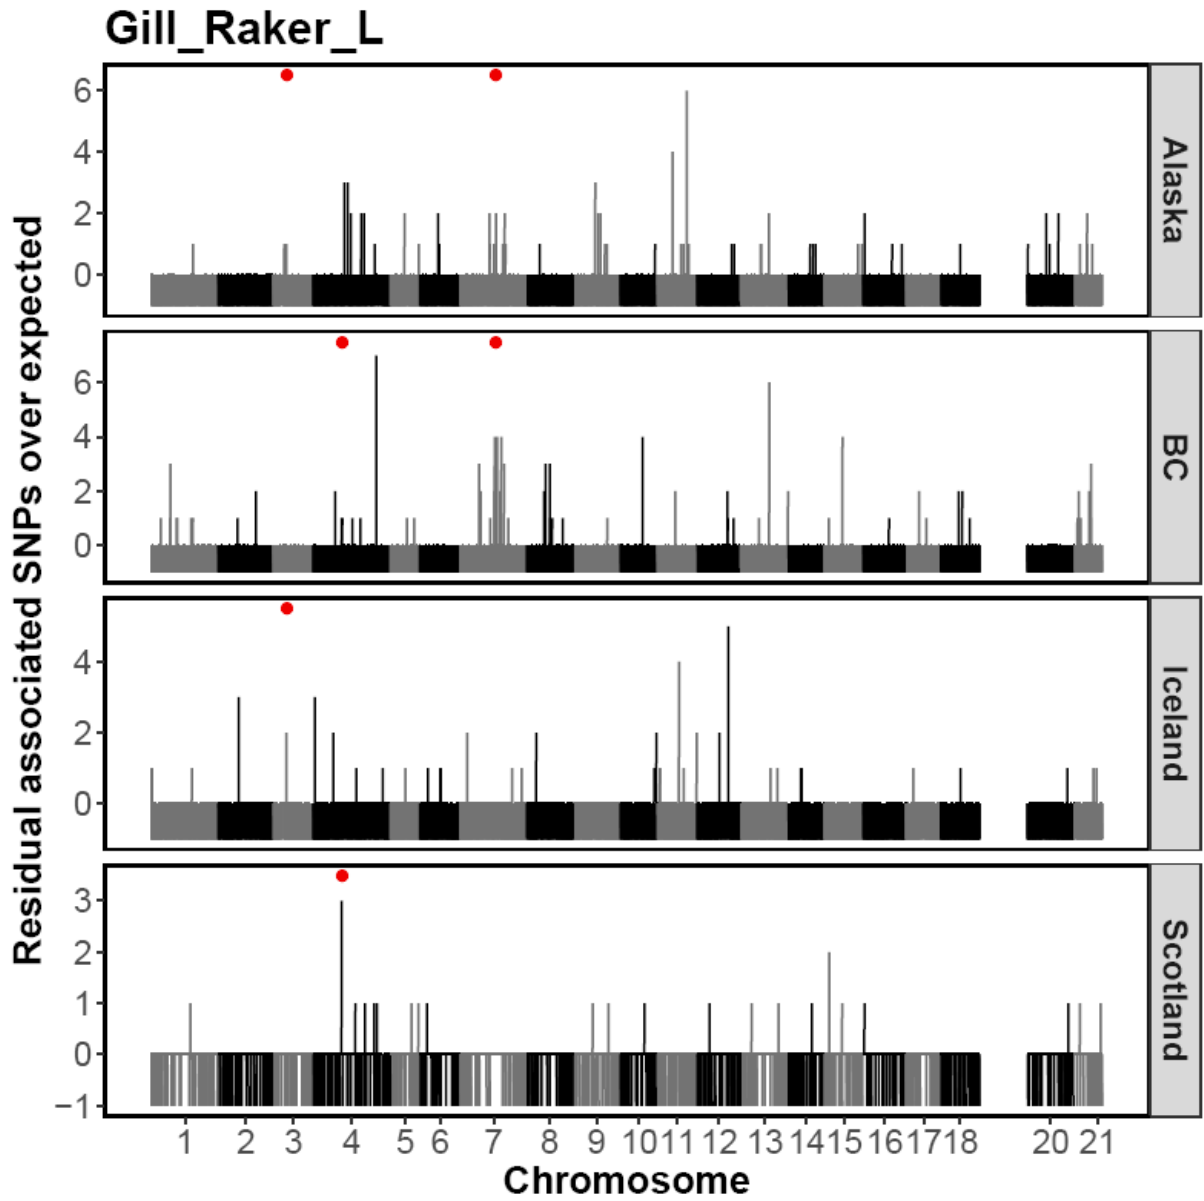

# Gill\_Raker\_N

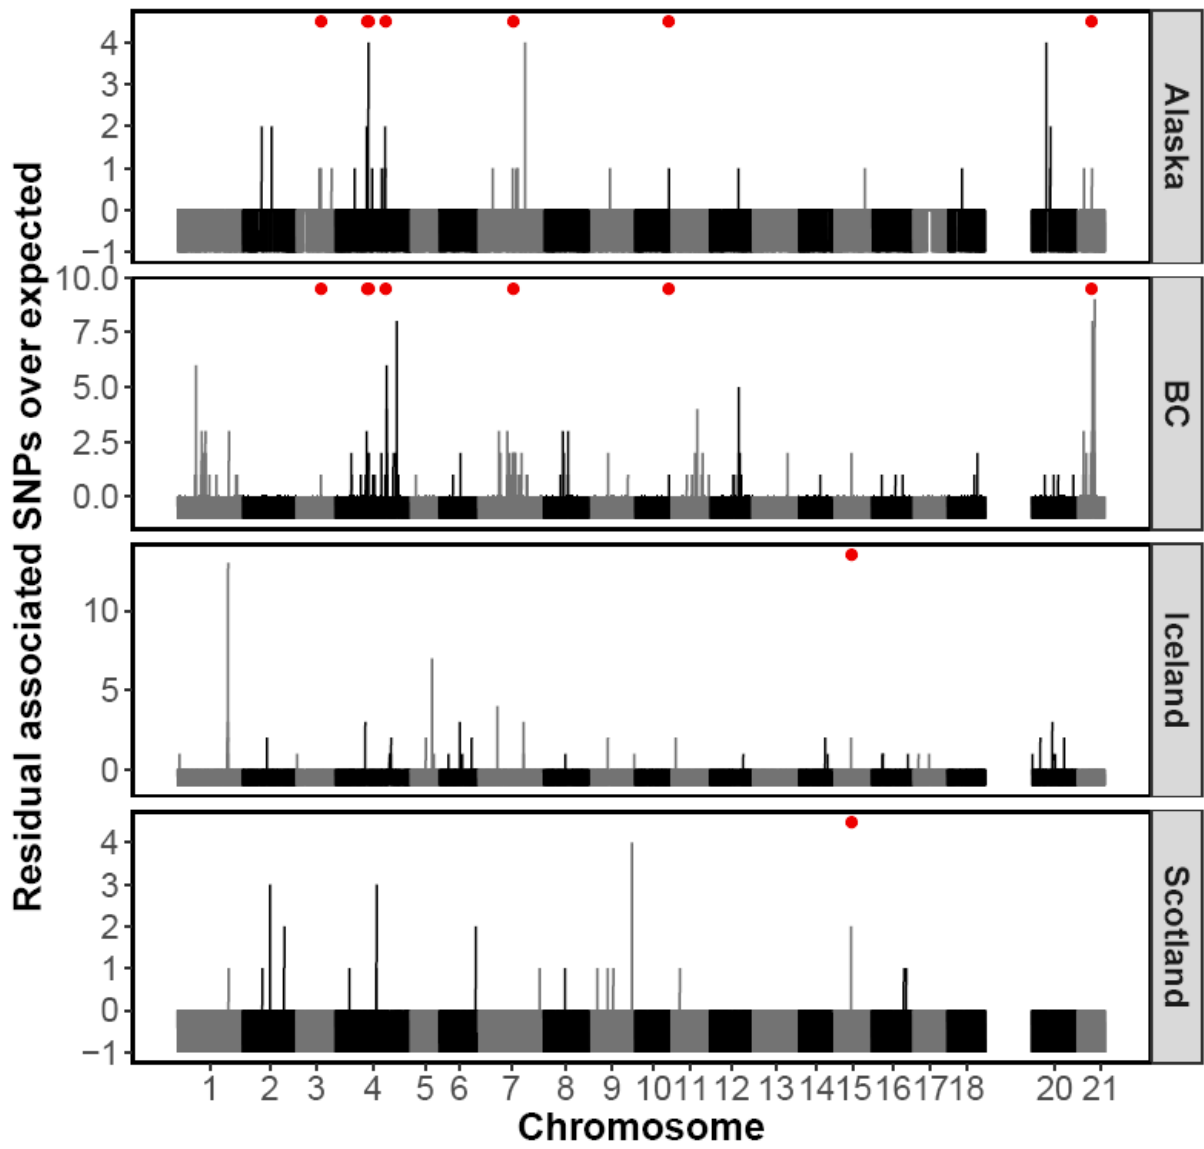

**Supplementary Fig. 7.** Correlations (Spearman's  $\rho$ ) between our 19 environmental / phenotypic variables and the first two major PC axes of genetic variation (population structure) within each adaptive radiation.

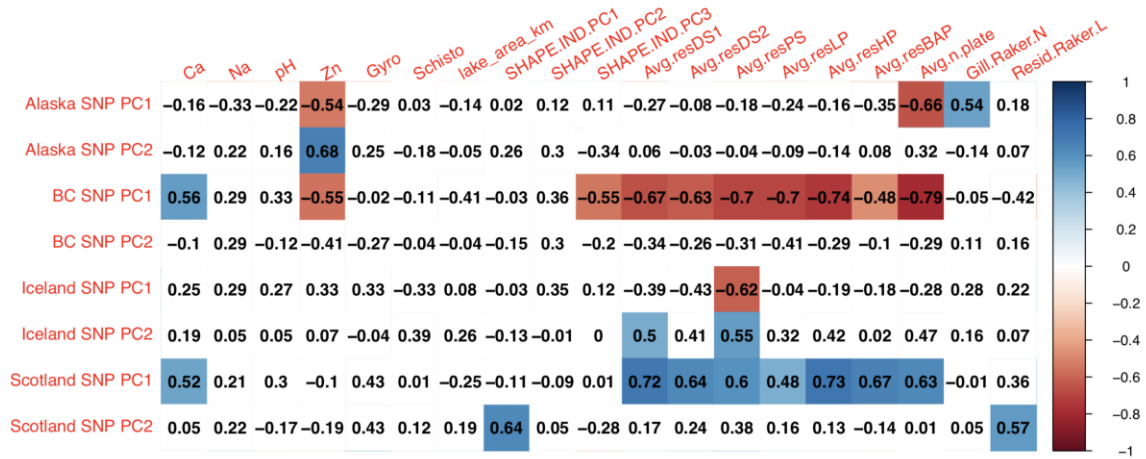

**Supplementary Fig. 8.** Example illustration for Calcium of outlier windows on the basis of SNPs above a 99% binomial expectation (blue line). Red points denote 50kb outlier windows, whilst black points denote 50kb windows with associated SNPs in line with or less than the binomial expectation, given the number of SNPs within each window (SNP count).

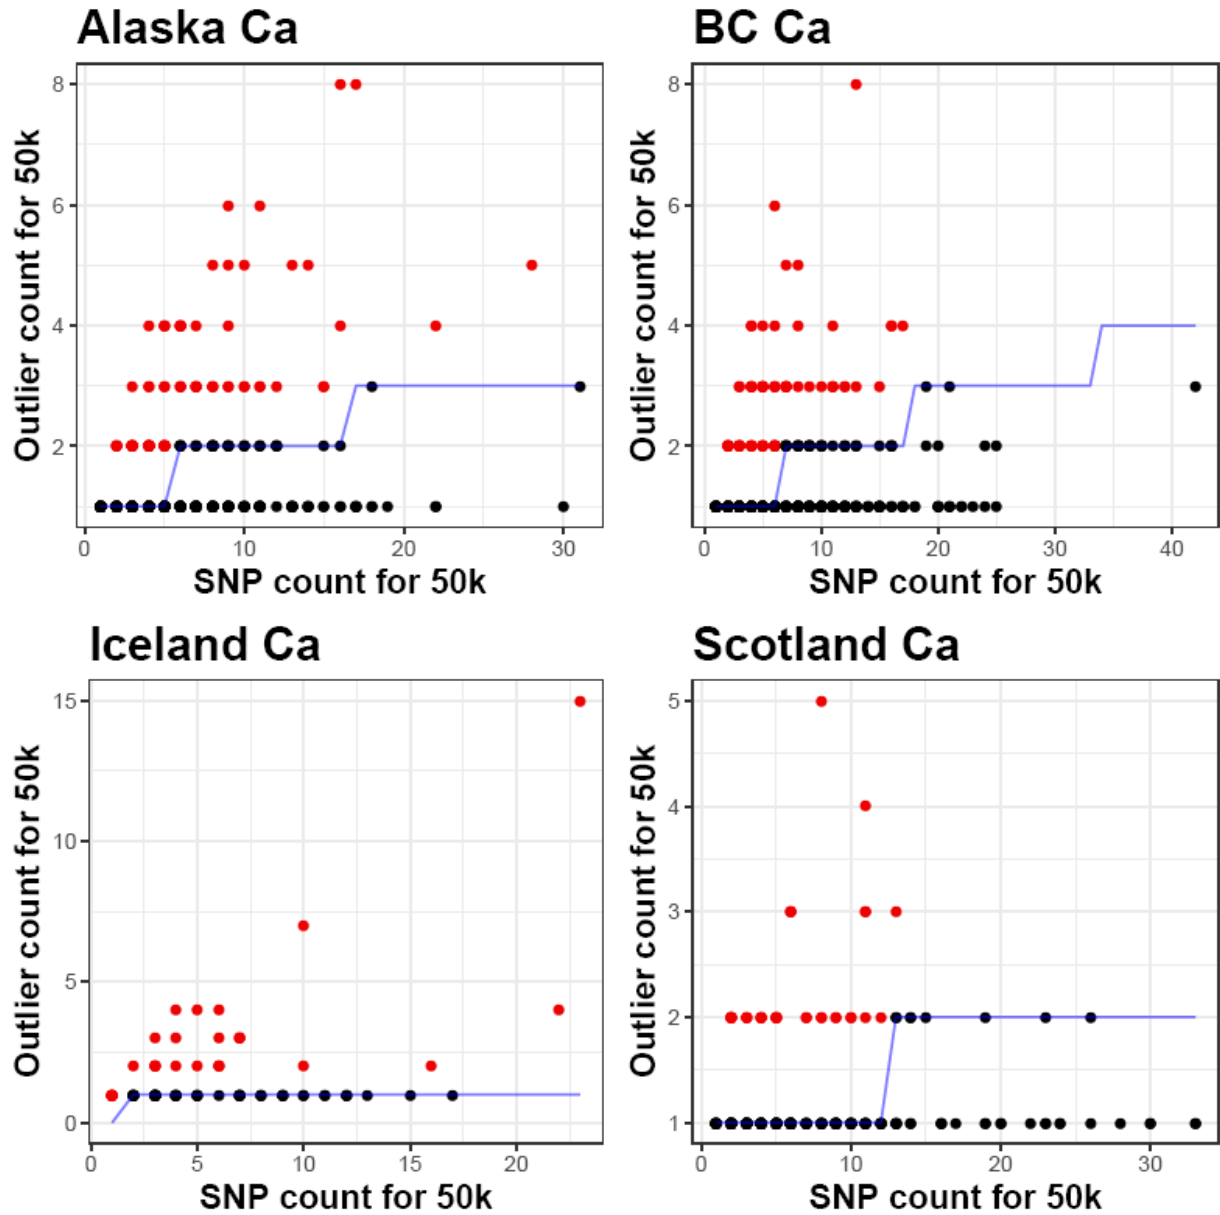

**Supplementary Table 1.** Names of lakes sampled, abbreviations of their names, geographic region and area within the geographic region where samples came from, date of sampling, geographic coordinates of each lake and numbers of three-spined sticklebacks analysed from each lake.

| Population name   | Code | Geographic region | Area       | Date       | Latitude      | Longitude      | N  |
|-------------------|------|-------------------|------------|------------|---------------|----------------|----|
| <i>Freshwater</i> |      |                   |            |            |               |                |    |
| Aonghais          | AONG | Scotland          | W          | 16.05.2013 | 57°38'39.89"N | 7°16'27.49"W   | 18 |
| Mhic a'Roin       | AROI | Scotland          | S          | 09.05.2013 | 57°35'40.8"N  | 7°25'52.5"W    | 19 |
| a' Bharpa         | BHAR | Scotland          | S          | 14.05.2013 | 57°34'15.1"N  | 7°18'07.1"W    | 18 |
| na Buaille        | BUAI | Scotland          | NE         | 13.05.2013 | 57°38'48.94"N | 7°11'52.85"W   | 17 |
| Chadha Ruaidh     | CHRU | Scotland          | SE         | 29.04.2013 | 57°35'38.63"N | 7°11'51.84"W   | 17 |
| an Daimh          | DAIM | Scotland          | S          | 30.04.2013 | 57°35'35.40"N | 7°12'33.27"W   | 20 |
| Eisiadar          | EISI | Scotland          | N          | 17.05.2013 | 57°37'54.97"N | 7°21'14.53"W   | 17 |
| Fada              | FADA | Scotland          | E          | 17.05.2013 | 57°37'3.69"N  | 7°12'33.92"W   | 15 |
| nan Geireann      | GEIR | Scotland          | N          | 16.05.2013 | 57°38'24.56"N | 7°17'24.93"W   | 17 |
| Mhic Gille-bhrìde | GILL | Scotland          | W          | 09.05.2013 | 57°36'7.11"N  | 7°24'35.29"W   | 17 |
| Hosta             | HOST | Scotland          | NW         | 15.05.2013 | 57°37'37.65"N | 7°29'27.28"W   | 19 |
| Iala              | IALA | Scotland          | E          | 16.05.2013 | 57°37'11.28"N | 7°12'20.41"W   | 18 |
| na Moracha        | MORA | Scotland          | S          | 07.05.2013 | 57°34'24.75"N | 7°16'33.73"W   | 21 |
| na Reival         | REIV | Scotland          | W          | 04.05.2013 | 57°36'40.78"N | 7°30'52.84"W   | 19 |
| Scadavay          | SCAD | Scotland          | S          | 06.05.2013 | 57°35'4.09"N  | 7°14'9.56"W    | 17 |
| nan Strùban       | STRU | Scotland          | SW         | 17.05.2013 | 57°33'29.8"N  | 7°21'09.1"W    | 16 |
| Tormasad          | TORM | Scotland          | SW         | 01.05.2013 | 57°33'43.7"N  | 7°19'00.6"W    | 19 |
| Trosavat          | TROS | Scotland          | SW         | 19.05.2013 | 57°35'3.85"N  | 7°24'48.40"W   | 20 |
| Bakkatjorn        | BAKK | Iceland           | SW         | 02.06.2014 | 64° 9'19.29"N | 22° 1'6.99"W   | 19 |
| Eidarvatn         | EIDA | Iceland           | E          | 17.06.2014 | 65°23'17.26"N | 14°21'35.94"W  | 19 |
| Flodid            | FLOD | Iceland           | N          | 09.06.2014 | 65°29'27.95"N | 20°21'33.59"W  | 20 |
| Galtabol          | GALT | Iceland           | N          | 09.06.2014 | 65°15'40.89"N | 19°44'24.30"W  | 19 |
| Grettislaug       | GRET | Iceland           | N          | 13.06.2014 | 65°52'57.3"N  | 19°44'13.1"W   | 19 |
| Grjotarvatn       | GRJO | Iceland           | W          | 08.07.2014 | 64°46'36.39"N | 22° 0'6.89"W   | 18 |
| Holsvatn          | HOLS | Iceland           | W          | 26.05.2014 | 64°30'48.00"N | 22° 8'43.28"W  | 18 |
| Hredavatn         | HRED | Iceland           | W          | 26.05.2014 | 64°45'56.66"N | 21°34'21.72"W  | 18 |
| Kleifarvatn       | KLEI | Iceland           | SW         | 22.05.2014 | 63°55'27.55"N | 21°59'56.42"W  | 16 |
| Mjoavatn          | MJOA | Iceland           | N          | 09.06.2014 | 65°15'41.45"N | 19°48'4.60"W   | 20 |
| Myvatn-lava       | MYVL | Iceland           | NE         | 14.06.2014 | 65°37'41.49"N | 16°55'31.57"W  | 19 |
| Myvatn-mud        | MYVM | Iceland           | NE         | 14.06.2014 | 65°39'7.67"N  | 16°58'8.95"W   | 20 |
| Sauravatn         | SAUR | Iceland           | W          | 26.05.2014 | 64°39'47.23"N | 22° 7'32.61"W  | 16 |
| Skorradalsvatn    | SKOR | Iceland           | W          | 30.06.2014 | 64°28'57.48"N | 21°19'2.22"W   | 19 |
| Thingvallavatn    | THIN | Iceland           | SW         | 23.05.2014 | 64°11'11.6"N  | 21°05'18.1"W   | 20 |
| Urridavatn        | URR2 | Iceland           | SE         | 17.06.2014 | 65°17'59.45"N | 14°27'21.82"W  | 19 |
| Urridakotsvatn    | URRI | Iceland           | E          | 19.05.2014 | 64° 4'5.41"N  | 21°54'34.08"W  | 19 |
| Vífilsstaðavatn   | VIFI | Iceland           | SW         | 18.05.2014 | 64° 4'45.72"N | 21°52'38.86"W  | 20 |
| Ambrose           | AMBR | B.C.              | Sechelt P. | 20.05.2015 | 49°44'4.70"N  | 124° 1'32.52"W | 17 |



|                       |       |          |               |            |               |                |    |
|-----------------------|-------|----------|---------------|------------|---------------|----------------|----|
| Beaver                | BEAV  | B.C.     | Vancouver I.  | 12.05.2015 | 48°48'41.96"N | 124° 4'51.38"W | 18 |
| Brannen               | BRAN  | B.C.     | Vancouver I.  | 13.05.2015 | 49°12'51.16"N | 124° 2'59.50"W | 18 |
| Bullocks              | BULL  | B.C.     | Saltspring I. | 10.05.2015 | 48°52'24.4"N  | 123°30'22.0"W  | 15 |
| Cranby                | CRAN  | B.C.     | Texada I.     | 29.04.2015 | 49°41'31.85"N | 124°30'27.00"W | 20 |
| Dougan                | DOUG  | B.C.     | Vancouver I.  | 12.05.2015 | 48°42'51.73"N | 123°36'38.44"W | 16 |
| Errock                | ERRO  | B.C.     | Fraser Valley | 22.05.2015 | 49°13'28.73"N | 122° 0'41.42"W | 18 |
| Garden Bay            | GARD  | B.C.     | Sechelt P.    | 26.04.2015 | 49°39'3.62"N  | 124° 0'59.67"W | 10 |
| Hoggan                | HOGG  | B.C.     | Gabriola I.   | 14.05.2015 | 49° 9'12.09"N | 123°49'41.94"W | 18 |
| Hotel                 | HOTE  | B.C.     | Sechelt P.    | 25.04.2015 | 49°38'19.46"N | 124° 3'9.01"W  | 18 |
| Kennedy               | KENN  | B.C.     | Vancouver I.  | 15.05.2015 | 49° 7'35.72"N | 125°25'35.84"W | 18 |
| Kirk                  | KIRK  | B.C.     | Texada I.     | 01.05.2015 | 49°44'24.21"N | 124°34'59.82"W | 19 |
| Klein                 | KLEN  | B.C.     | Sechelt P.    | 26.04.2015 | 49°44'20.34"N | 123°58'0.93"W  | 18 |
| Lily                  | LILY  | B.C.     | Sechelt P.    | 25.04.2015 | 49°36'44.02"N | 124° 1'16.73"W | 19 |
| North                 | NORT  | B.C.     | Sechelt P.    | 26.04.2015 | 49°44'52.60"N | 123°58'31.91"W | 14 |
| Sproat                | SPRO  | B.C.     | Vancouver I.  | 15.05.2015 | 49°17'04.3"N  | 124°58'25.5"W  | 18 |
| Stowell               | STOW  | B.C.     | Saltspring I. | 10.05.2015 | 48°46'55.12"N | 123°26'41.46"W | 17 |
| Trout                 | TROUT | B.C.     | Sechelt P.    | 25.04.2015 | 49°30'25.02"N | 123°52'27.28"W | 18 |
| Arness                | ARNE  | Alaska   | Kenai         | 15.06.2015 | 60°38'45.73"N | 151°18'7.36"W  | 17 |
| Arrow                 | ARRO  | Alaska   | Kenai         | 24.06.2015 | 60°45'1.29"N  | 150°29'21.07"W | 15 |
| Barley                | BARL  | Alaska   | Mat-Su        | 08.06.2015 | 61°21'40.09"N | 150° 5'1.20"W  | 18 |
| Bear Paw              | BEPA  | Alaska   | Mat-Su        | 03.06.2015 | 61°36'50.38"N | 149°45'11.91"W | 17 |
| Big                   | BIGL  | Alaska   | Mat-Su        | 08.06.2015 | 61°31'58.86"N | 149°50'3.79"W  | 15 |
| Bruce                 | BRUC  | Alaska   | Mat-Su        | 12.06.2015 | 61°36'31.97"N | 149°33'4.77"W  | 16 |
| Community             | COMM  | Alaska   | Kenai         | 15.06.2015 | 60°42'8.72"N  | 151°23'1.32"W  | 17 |
| Corcoran              | CORC  | Alaska   | Mat-Su        | 05.06.2015 | 61°34'23.07"N | 149°41'30.40"W | 16 |
| Daniel                | DANI  | Alaska   | Kenai         | 15.06.2015 | 60°43'28.79"N | 151°10'49.99"W | 18 |
| Duck                  | DUCK  | Alaska   | Kenai         | 15.06.2015 | 60°41'7.33"N  | 151°13'25.41"W | 16 |
| Jade                  | JADE  | Alaska   | Mat-Su        | 08.06.2015 | 61°31'29.25"N | 149°52'1.50"W  | 18 |
| Long                  | LONG  | Alaska   | Mat-Su        | 11.06.2015 | 61°34'33.76"N | 149°46'29.47"W | 18 |
| Luci                  | LUCI  | Alaska   | Mat-Su        | 03.06.2015 | 61°34'11.93"N | 149°28'53.26"W | 18 |
| Lynda                 | LYND  | Alaska   | Mat-Su        | 08.06.2015 | 61°34'13.44"N | 149°50'24.75"W | 17 |
| Seymour               | SEYM  | Alaska   | Mat-Su        | 03.06.2015 | 61°36'52.7"N  | 149°39'51.3"W  | 17 |
| Tern                  | TERN  | Alaska   | Kenai         | 24.06.2015 | 60°32'2.70"N  | 149°32'49.59"W | 18 |
| Toad                  | TOAD  | Alaska   | Mat-Su        | 03.06.2015 | 61°37'12.12"N | 149°41'56.11"W | 19 |
| Walby                 | WALB  | Alaska   | Mat-Su        | 22.06.2015 | 61°37'13.2"N  | 149°12'48.5"W  | 18 |
| Y                     | YLAK  | Alaska   | Mat-Su        | 22.06.2015 | 62°18'21.42"N | 150° 3'52.34"W | 19 |
| <i>Marine</i>         |       |          |               |            |               |                |    |
| Ob nan Stearnain      | OBSM  | Scotland | S             | 17.05.2013 | 57°36'4.82"N  | 7°10'24.50"W   | 19 |
| Nypslon               | NYPS  | Iceland  | NE            | 17.06.2014 | 65°46'18.85"N | 14°50'6.10"W   | 19 |
| Little Campbell River | LICA  | B.C.     | Surrey        | 27.04.2015 | 49° 0'50.89"N | 122°45'38.50"W | 20 |
| Mud                   | MUD   | Alaska   | Mat-Su        | 01.06.2015 | 61°35'50.39"N | 149°20'36.69"W | 18 |

**Supplementary Table 2.** Measured abiotic and biotic characteristics of 73 freshwater lakes and average phenotypic traits for populations from those lakes. From left to right: Calcium (Ca), sodium (Na) and zinc (Zn) concentrations, pH, lake area, prevalence of *Gyrodactylus* spp. (Gyro) and *Schistocephalus solidus* (Schisto), Pricipal Components 1, 2 and 3 of body shape (Shape PC1,2 ,3), length of dorsal spines 1 and 2 (DS1, DS2), length of pelvic spine (PS), lenght of pelvis (LP), height of pelvis (HP), length of biggest armour plate (BAP), number of armour plates (plate.N), standard length (SL), gill raker number (Gill\_Raker\_N) and length (Gill\_Raker\_L).

| Radiation | Pop  | Ca<br>(mg/L) | Na<br>(mg/L) | Zn<br>(µg/L) | pH   | Lake<br>Area<br>(km <sup>2</sup> ) | Gyro  | Schisto | Shape<br>PC1 | Shape<br>PC2 | Shape<br>PC3 | DS1   | DS2    | PS     | LP     | HP    | BAP    | Plate<br>N | SL    | GRN   | GRL    |
|-----------|------|--------------|--------------|--------------|------|------------------------------------|-------|---------|--------------|--------------|--------------|-------|--------|--------|--------|-------|--------|------------|-------|-------|--------|
| Alaska    | ARNE | 8.106        | 4.192        | 48.26        | 7.41 | 0.911                              | 0.926 | 0.000   | -0.012       | 0.002        | -            | -     | -0.066 | -0.060 | 0.016  | 0.043 | 0.049  | 6.059      | 58.53 | 18.06 | -0.015 |
| Alaska    | ARRO | 0.736        | 1.8          | 31.582       | 6.92 | 0.137                              | 0.900 | 0.000   | -0.011       | 0.016        | -            | 0.012 | 0.026  | -0.492 | -0.133 | -     | 0.004  | 4.800      | 57.33 | 20.20 | -0.068 |
| Alaska    | BARL | 42.206       | 2.75         | 8.339        | 8.37 | 0.163                              | 0.967 | 0.100   | -0.014       | 0.006        | -            | -     | -0.032 | -0.073 | 0.001  | 0.011 | -0.024 | 4.833      | 60.11 | 21.44 | -0.005 |
| Alaska    | BEPA | 0.21         | 0.585        | 9.244        | 5.7  | 0.174                              | 0.167 | 0.167   | -0.010       | 0.004        | -            | -     | -0.018 | -0.433 | -0.084 | -     | -0.038 | 3.824      | 42.00 | 20.12 | -0.005 |
| Alaska    | BIGL | 21.962       | 3.552        | 5.083        | 8.07 | 12.310                             | 0.900 | 0.067   | 0.007        | -0.002       | -            | 0.073 | 0.070  | 0.098  | 0.019  | -     | -0.016 | 6.333      | 47.00 | 20.07 | 0.129  |
| Alaska    | BRUC | 1.111        | 0.661        | 6.779        | 6.61 | 0.100                              | 0.862 | 0.000   | -0.011       | -0.002       | -            | -     | -0.046 | -0.428 | -0.012 | -     | 0.018  | 4.563      | 47.56 | 20.00 | 0.048  |
| Alaska    | COMM | 0.325        | 1.836        | 26.339       | 6.8  | 0.052                              | 0.769 | 0.067   | -0.006       | 0.012        | -            | -     | -0.032 | -0.279 | -0.023 | -     | 0.011  | 6.389      | 44.56 | 19.83 | -0.019 |
| Alaska    | CORC | 29.2         | 4.643        | 5.147        | 8.18 | 0.041                              | 0.700 | 0.233   | -0.018       | 0.007        | -            | 0.020 | 0.036  | 0.019  | 0.020  | 0.036 | 0.012  | 5.824      | 44.00 | 20.82 | -0.191 |
| Alaska    | DANI | 13.515       | 4.53         | 14.593       | 7.51 | 2.713                              | 0.533 | 0.333   | 0.009        | -0.004       | -            | 0.042 | 0.045  | 0.041  | 0.038  | 0.010 | 0.045  | 6.667      | 48.89 | 20.28 | 0.135  |
| Alaska    | DUCK | 12.677       | 4.842        | 13.619       | 9.68 | 0.343                              | 1.000 | 0.000   | 0.001        | 0.001        | -            | 0.019 | -0.020 | -0.046 | -0.004 | 0.054 | -0.016 | 7.000      | 50.44 | 18.56 | -0.060 |
| Alaska    | JADE | 0.826        | 0.649        | 15.431       | 6.57 | 0.100                              | 0.423 | 0.167   | -0.009       | 0.004        | -            | -     | -0.012 | -0.019 | -0.004 | 0.022 | -0.094 | 5.333      | 58.83 | 21.06 | 0.001  |
| Alaska    | LONG | 12.837       | 2.426        | 4.968        | 7.8  | 0.178                              | 0.833 | 0.033   | -0.002       | -0.002       | -            | 0.074 | 0.076  | 0.079  | 0.020  | 0.044 | -0.027 | 6.278      | 52.61 | 21.44 | 0.112  |
| Alaska    | LUCI | 29.942       | 11.982       | 7.562        | 8.17 | 1.517                              | 0.885 | 0.167   | -0.021       | 0.005        | -            | 0.033 | 0.031  | 0.026  | 0.023  | 0.073 | 0.054  | 6.000      | 47.22 | 20.72 | -0.044 |
| Alaska    | LYND | 11.641       | 2.007        | 7.692        | 7.42 | 0.057                              | 0.467 | 0.000   | -0.003       | -0.005       | -            | -     | -0.037 | 0.003  | 0.022  | -     | -0.020 | 6.056      | 50.22 | 21.50 | 0.137  |

|        |       |        |       |        |      |        |       |       |        |        |       |       |        |        |        |        |        |        |        |       |        |        |
|--------|-------|--------|-------|--------|------|--------|-------|-------|--------|--------|-------|-------|--------|--------|--------|--------|--------|--------|--------|-------|--------|--------|
| Alaska | SEYM  | 25.906 | 3.526 | 11.674 | 8.28 | 0.947  | 0.857 | 0.067 | -0.010 | 0.011  | -     | -     | -0.014 | -0.068 | -0.002 | 0.038  | 0.009  | 5.706  | 50.77  | 22.12 | 0.002  |        |
| Alaska | TERN  | 32.131 | 3.036 | 7.936  | 7.6  | 0.512  | 0.767 | 0.300 | -0.024 | -0.009 | 0.004 | 0.035 | 0.033  | 0.030  | 0.033  | 0.070  | 0.024  | 6.895  | 43.37  | 18.63 | -0.129 |        |
| Alaska | TOAD  | 0.604  | 0.688 | 6.639  | 5.99 | 0.188  | 0.567 | 0.267 | -0.011 | 0.007  | -     | -     | -0.045 | -0.496 | -0.093 | -      | -0.011 | 4.350  | 58.50  | 20.85 | -0.051 |        |
| Alaska | WALB  | 25.468 | 7.307 | 10.209 | 8.53 | 0.201  | 0.462 | 0.367 | -0.019 | 0.005  | -     | -     | 0.049  | 0.054  | 0.038  | 0.027  | 0.046  | 0.016  | 6.684  | 40.90 | 20.11  | -0.080 |
| Alaska | YLAK  | 2.822  | 1.295 | 16.374 | 6.98 | 0.185  | 0.833 | 0.133 | -0.014 | 0.012  | -     | -     | 0.004  | -0.022 | -0.482 | -0.189 | -      | 0.028  | 5.789  | 54.84 | 20.84  | 0.106  |
| BC     | AMBR  | 2.231  | 1.906 | 10.188 | 6.88 | 0.298  | 0.448 | 0.000 | -0.007 | 0.030  | 0.011 | 0.025 | -0.001 | -0.012 | -0.026 | -      | -0.010 | 6.294  | 50.24  | 24.94 | 0.288  |        |
| BC     | BEAV  | 3.87   | 1.211 | 31.199 | 6.82 | 0.193  | 1.000 | 0.040 | -0.001 | 0.005  | 0.001 | 0.098 | 0.096  | 0.164  | 0.030  | 0.073  | 0.007  | 6.950  | 51.60  | 19.28 | -0.142 |        |
| BC     | BRAN  | 7.434  | 3.162 | 8.894  | 7.82 | 1.087  | 0.960 | 0.000 | 0.006  | 0.006  | -     | -     | 0.187  | 0.182  | 0.220  | 0.028  | 0.159  | 0.035  | 5.737  | 53.74 | 17.79  | -0.096 |
| BC     | BULL  | 10.456 | 8.551 | 7.802  | 7.58 | 0.094  | 0.739 | 0.059 | -0.007 | 0.015  | -     | -     | -0.133 | -0.217 | -0.065 | -      | -0.066 | 3.867  | 48.20  | 19.67 | 0.093  |        |
| BC     | CRAN  | 15.627 | 3.86  | 13.049 | 7.23 | 0.446  | 1.000 | 0.000 | -0.004 | 0.010  | 0.000 | -     | -0.108 | -0.096 | -0.029 | -      | -0.023 | 5.450  | 45.10  | 19.85 | -0.009 |        |
| BC     | DOUG  | 20.007 | 6.98  | 15.88  | 7.52 | 0.100  | 0.917 | 0.000 | -0.021 | -0.006 | -     | -     | -0.148 | -0.165 | -0.018 | -      | 0.031  | 5.063  | 51.75  | 20.19 | 0.033  |        |
| BC     | ERRO  | 3.03   | 1.997 | 45.606 | 7    | 0.259  | 0.833 | 0.000 | -0.008 | -0.005 | 0.009 | 0.127 | 0.106  | 0.183  | 0.016  | 0.132  | 0.057  | 32.500 | 55.44  | 19.89 | 0.198  |        |
| BC     | GARD  | 4.699  | 4.768 | 12.68  | 6.91 | 0.624  | 0.000 | 0.000 | 0.017  | 0.012  | 0.011 | 0.056 | 0.002  | 0.035  | 0.003  | 0.048  | 0.009  | 7.222  | 49.78  | 22.67 | 0.060  |        |
| BC     | HOGG  | 6.771  | 6.542 | 10.6   | 6.09 | 0.197  | 0.880 | 0.000 | -0.014 | 0.011  | -     | -     | -0.079 | -0.138 | -0.009 | -      | -0.008 | 4.800  | 45.20  | 19.50 | 0.005  |        |
| BC     | HOTE  | 2.861  | 4.992 | 9.132  | 7.36 | 0.252  | 0.000 | 0.000 | -0.016 | 0.005  | 0.013 | 0.142 | 0.106  | 0.197  | 0.046  | 0.108  | 0.003  | 7.000  | 46.65  | 21.88 | 0.124  |        |
| BC     | KENN  | 5.891  | 1.079 | 11.865 | 7    | 60.400 | 1.000 | 0.000 | -0.010 | 0.008  | -     | -     | 0.156  | 0.131  | 0.239  | 0.036  | 0.105  | -0.025 | 30.895 | 54.26 | 22.32  | 0.165  |
| BC     | KIRK  | 19.732 | 2.959 | 8.884  | 7.6  | 0.083  | 0.778 | 0.000 | 0.002  | 0.019  | 0.000 | -     | -0.102 | -0.195 | -0.004 | -      | -0.041 | 4.000  | 54.33  | 20.67 | -0.271 |        |
| BC     | KLEN  | 5.101  | 1.491 | 7.852  | 6.65 | 0.135  | 0.000 | 0.000 | 0.001  | 0.016  | -     | -     | -0.100 | -0.305 | -0.027 | -      | 0.012  | 5.529  | 46.00  | 21.13 | -0.175 |        |
| BC     | LILY  | 5.665  | 6.498 | 11.854 | 6.97 | 0.121  | 0.029 | 0.000 | 0.000  | 0.010  | 0.003 | 0.055 | 0.038  | 0.087  | 0.022  | 0.047  | 0.037  | 6.053  | 42.53  | 20.84 | 0.010  |        |
| BC     | NORT  | 4.362  | 2.191 | 3.418  | 7.11 | 0.128  | 0.000 | 0.000 | 0.005  | 0.020  | 0.005 | 0.104 | 0.077  | 0.090  | 0.021  | 0.005  | 0.017  | 33.643 | 47.36  | 22.29 | 0.014  |        |
| BC     | SPRO  | 8.646  | 1.149 | 15.463 | 7.04 | 37.750 | 0.880 | 0.000 | 0.006  | 0.012  | -     | -     | 0.071  | 0.080  | 0.126  | 0.009  | 0.098  | -0.019 | 7.947  | 61.32 | 20.11  | -0.059 |
| BC     | STOW  | 8.987  | 5.941 | 8.91   | 7.61 | 0.056  | 0.478 | 0.000 | -0.017 | -0.003 | -     | -     | -0.158 | -0.242 | -0.032 | -      | 0.005  | 4.765  | 46.18  | 21.88 | -0.001 |        |
| BC     | TROUT | 6.263  | 3.675 | 8.692  | 7.12 | 0.076  | 0.640 | 0.000 | 0.011  | 0.020  | -     | -     | 0.032  | 0.004  | -0.008 | -0.039 | -      | -0.015 | 4.389  | 46.06 | 20.88  | -0.220 |

|          |      |        |        |         |      |        |       |       |        |        |       |       |        |        |        |        |        |        |        |        |        |        |        |        |
|----------|------|--------|--------|---------|------|--------|-------|-------|--------|--------|-------|-------|--------|--------|--------|--------|--------|--------|--------|--------|--------|--------|--------|--------|
| Iceland  | BAKK | 34.329 | 58.667 | 204.131 | 9.17 | 0.140  | 0.886 | 0.000 | -0.008 | 0.000  | 0.017 | -     | 0.016  | -0.024 | 0.041  | 0.020  | 0.123  | 0.050  | 28.421 | 47.38  | 18.16  | 0.235  |        |        |
| Iceland  | EIDA | 5.128  | 5.038  | 229.685 | 7.73 | 1.200  | 0.714 | 0.286 | 0.001  | -0.001 | -     | -     | 0.011  | 0.023  | -0.019 | -0.009 | -0.008 | -      | 0.024  | -0.011 | 4.632  | 37.03  | 17.44  | -0.026 |
| Iceland  | FLOD | 5.577  | 6.074  | 194.573 | 8.05 | 2.800  | 0.771 | 0.686 | -0.005 | -0.015 | 0.005 | 0.044 | 0.041  | 0.075  | 0.003  | 0.046  | 0.028  | 5.684  | 48.62  | 18.28  | -0.062 |        |        |        |
| Iceland  | GALT | 6.022  | 5.013  | 203.798 | 7.7  | 1.200  | 0.686 | 0.886 | 0.006  | -0.018 | -     | -     | 0.008  | 0.041  | 0.050  | 0.059  | 0.009  | -      | 0.002  | -0.031 | 4.833  | 41.16  | 17.38  | -0.050 |
| Iceland  | GRET | 2.486  | 49.938 | 227.627 | 8.59 | 0.002  | 0.143 | 0.000 | -0.019 | -0.008 | 0.011 | 0.033 | 0.022  | 0.041  | -0.010 | -      | -      | 0.007  | -0.017 | 9.789  | 42.67  | 17.37  | -0.034 |        |
| Iceland  | GRJO | 3.925  | 4.34   | 213.518 | 7.45 | 1.810  | 0.286 | 0.657 | -0.016 | -0.008 | 0.009 | 0.001 | 0.013  | 0.013  | -0.004 | 0.010  | 0.001  | 5.278  | 42.14  | 18.11  | 0.002  |        |        |        |
| Iceland  | HOLS | 3.569  | 10.519 | 191.938 | 7.53 | 1.400  | 0.657 | 0.571 | -0.013 | -0.016 | 0.012 | -     | 0.004  | 0.000  | 0.016  | -0.005 | -      | 0.006  | 0.021  | 4.353  | 37.64  | 16.94  | -0.138 |        |
| Iceland  | HRED | 3.896  | 6.933  | 206.899 | 7.5  | 1.100  | 0.971 | 0.229 | 0.016  | -0.010 | -     | -     | 0.005  | 0.027  | -0.026 | -0.025 | -0.002 | -      | 0.052  | 0.022  | 4.722  | 42.76  | 17.94  | -0.069 |
| Iceland  | KLEI | 9.882  | 10.756 | 186.013 | 7.44 | 10.000 | 0.462 | 0.654 | -0.020 | -0.005 | 0.007 | 0.014 | -0.001 | 0.037  | 0.006  | 0.020  | 0.024  | 6.563  | 39.98  | 19.56  | -0.075 |        |        |        |
| Iceland  | MJOA | 5.075  | 4.612  | 213.412 | 7.38 | 2.900  | 1.000 | 0.857 | 0.012  | -0.009 | 0.005 | 0.021 | 0.034  | 0.045  | 0.000  | 0.034  | -0.011 | 6.053  | 53.22  | 17.53  | -0.026 |        |        |        |
| Iceland  | MYVL | 22.461 | 42.501 | 211.865 | 8.47 | 38.400 | 0.914 | 0.371 | -0.012 | 0.001  | 0.011 | -     | 0.004  | 0.000  | 0.015  | 0.011  | 0.060  | -0.003 | 6.111  | 41.32  | 20.00  | 0.039  |        |        |
| Iceland  | MYVM | 8.348  | 14.686 | 210.338 | 9.6  | 38.400 | 1.000 | 0.286 | -0.011 | -0.011 | 0.008 | -     | 0.006  | -0.029 | 0.012  | 0.020  | 0.022  | 0.004  | 5.737  | 43.13  | 18.84  | -0.009 |        |        |
| Iceland  | SAUR | 4.91   | 13.399 | 181.474 | 7.08 | 0.800  | 0.143 | 0.657 | -0.017 | -0.014 | 0.015 | -     | 0.041  | -0.036 | -0.057 | -0.028 | -      | 0.006  | -0.021 | 3.813  | 41.13  | 18.27  | -0.207 |        |
| Iceland  | SKOR | 4.022  | 6.803  | 209.832 | 7.11 | 14.700 | 0.650 | 0.525 | 0.007  | -0.010 | 0.002 | 0.051 | 0.066  | 0.091  | 0.004  | 0.009  | 0.002  | 5.526  | 42.92  | 18.12  | 0.148  |        |        |        |
| Iceland  | THIN | 3.735  | 7.124  | 163.347 | 8.72 | 83.000 | 0.914 | 0.000 | -0.007 | -0.014 | 0.005 | -     | 0.027  | -0.039 | -0.002 | 0.025  | 0.036  | 0.112  | 5.750  | 41.96  | 18.35  | 0.032  |        |        |
| Iceland  | URR2 | 8.4    | 7.084  | 232.63  | 7.84 | 1.000  | 1.000 | 0.171 | 0.004  | -0.005 | -     | -     | 0.022  | -0.007 | -0.027 | 0.004  | -      | 0.042  | -0.023 | 4.474  | 38.86  | 17.58  | -0.039 |        |
| Iceland  | URRI | 5.686  | 18.726 | 223.849 | 8.05 | 0.130  | 1.000 | 0.029 | -0.006 | -0.012 | 0.007 | -     | 0.046  | -0.036 | -0.012 | -0.010 | 0.020  | -0.023 | 4.105  | 37.98  | 17.21  | -0.107 |        |        |
| Iceland  | VIFI | 9.791  | 19.503 | 201.478 | 9.24 | 0.300  | 0.983 | 0.207 | 0.012  | -0.009 | 0.020 | -     | 0.014  | -0.002 | -0.317 | -0.003 | -      | 0.252  | -0.108 | 2.125  | 37.09  | 18.15  | 0.034  |        |
| Scotland | AONG | 4.54   | 19.17  | 103.4   | 6.97 | 0.096  | 0.200 | 0.167 | 0.018  | -0.010 | 0.002 | -     | 0.025  | -0.019 | -0.027 | 0.008  | 0.036  | 0.009  | 3.056  | 28.21  | 18.50  | -0.100 |        |        |
| Scotland | AROI | 2.897  | 24.32  | 56.18   | 6.48 | 0.065  | 0.657 | 0.029 | 0.038  | 0.001  | 0.000 | 0.032 | 0.024  | 0.067  | 0.001  | 0.028  | 0.005  | 4.000  | 44.72  | 19.00  | 0.146  |        |        |        |
| Scotland | BHAR | 1.472  | 18.63  | 82.63   | 6.03 | 0.539  | 0.429 | 0.514 | 0.028  | -0.006 | 0.000 | -     | 0.025  | -0.175 | -0.286 | -0.033 | -      | 0.291  | -0.246 | 0.333  | 29.22  | 19.25  | -0.058 |        |
| Scotland | BUAI | 2.549  | 36.14  | 58.44   | 6.73 | 0.017  | 0.029 | 0.000 | -0.018 | -0.003 | 0.018 | 0.018 | 0.021  | -0.142 | -0.001 | -      | 0.049  | 0.035  | 3.294  | 33.62  | 19.00  | -0.056 |        |        |
| Scotland | CHRU | 2.203  | 18.77  | 62.7    | 6.58 | 0.021  | 0.000 | 0.167 | -0.008 | -0.002 | 0.016 | 0.002 | 0.000  | -0.014 | 0.004  | -      | 0.033  | 0.023  | 3.688  | 33.94  | 19.18  | -0.102 |        |        |

|          |      |       |       |       |      |       |       |       |        |        |       |       |        |        |        |       |        |       |       |       |        |
|----------|------|-------|-------|-------|------|-------|-------|-------|--------|--------|-------|-------|--------|--------|--------|-------|--------|-------|-------|-------|--------|
| Scotland | DAIM | 2.305 | 24.56 | 56.3  | 6.5  | 0.036 | 0.000 | 0.000 | 0.026  | -0.005 | 0.016 | -     | 0.001  | -0.014 | 0.010  | -     | -0.017 | 3.350 | 32.77 | 19.14 | -0.027 |
| Scotland | EISI | 2.813 | 22.54 | 79.14 | 6.82 | 0.114 | 0.543 | 0.143 | 0.011  | -0.005 | 0.004 | 0.001 | 0.000  | -0.026 | 0.005  | -     | 0.021  | 5.375 | 34.67 | 19.67 | -0.082 |
| Scotland | FADA | 1.809 | 17.29 | 90.41 | 6.71 | 0.106 | 0.171 | 0.000 | 0.025  | -0.003 | -     | -     | -0.149 | -0.277 | -0.181 | -     | -0.263 | 0.067 | 28.64 | 19.18 | 0.091  |
| Scotland | GEIR | 1.762 | 17.17 | 47.29 | 6.7  | 1.882 | 0.743 | 0.057 | 0.020  | -0.009 | 0.001 | -     | -0.011 | -0.028 | 0.021  | 0.028 | -0.082 | 1.824 | 30.75 | 17.25 | -0.059 |
| Scotland | GILL | 2.706 | 21.85 | 46.04 | 6.8  | 0.141 | 0.875 | 0.156 | 0.023  | -0.007 | 0.003 | 0.072 | 0.078  | 0.088  | 0.045  | 0.059 | 0.068  | 4.176 | 38.61 | 19.67 | 0.071  |
| Scotland | HOST | 30.56 | 27.47 | 66.52 | 8.34 | 0.258 | 0.886 | 0.771 | 0.020  | -0.014 | 0.003 | 0.019 | 0.020  | 0.021  | 0.009  | 0.021 | -0.008 | 4.526 | 39.85 | 18.80 | 0.065  |
| Scotland | IALA | 2.728 | 21.4  | 65.9  | 6.36 | 0.005 | 0.143 | 0.000 | -0.004 | -0.004 | 0.016 | -     | -0.006 | -0.031 | 0.027  | 0.026 | 0.062  | 4.444 | 35.31 | 18.00 | 0.027  |
| Scotland | MORA | 2.505 | 24.03 | 58.85 | 6.35 | 0.378 | 0.265 | 0.000 | 0.042  | 0.002  | -     | -     | -0.199 | -0.328 | -0.055 | -     | -0.318 | 0.053 | 31.89 | 18.00 | 0.057  |
| Scotland | REIV | 28.6  | 40.12 | 58.52 | 8.95 | 0.061 | 0.514 | 0.057 | -0.005 | 0.010  | 0.011 | 0.005 | 0.006  | 0.026  | 0.030  | 0.061 | 0.053  | 5.474 | 41.00 | 19.60 | -0.022 |
| Scotland | SCAD | 1.418 | 19.75 | 78.89 | 6.14 | 5.516 | 0.571 | 0.086 | 0.038  | 0.002  | 0.001 | -     | -0.157 | -0.354 | -0.067 | -     | -0.345 | 0.176 | 33.57 | 17.00 | -0.017 |
| Scotland | STRU | 3.724 | 25.05 | 93.42 | 7.06 | 0.192 | 0.686 | 0.419 | 0.008  | -0.016 | 0.009 | -     | -0.033 | -0.033 | 0.011  | -     | -0.324 | 0.250 | 32.94 | 20.00 | -0.008 |
| Scotland | TORM | 4.005 | 25.43 | 86.88 | 6.84 | 0.211 | 0.286 | 0.029 | 0.020  | -0.005 | 0.010 | -     | -0.120 | -0.077 | 0.000  | -     | -0.284 | 0.235 | 30.97 | 17.33 | 0.032  |
| Scotland | TROS | 2.845 | 26.12 | 93.32 | 6.71 | 0.065 | 0.686 | 0.030 | 0.026  | -0.004 | 0.004 | 0.061 | 0.065  | 0.053  | 0.024  | 0.066 | 0.042  | 5.350 | 40.40 | 16.40 | 0.082  |

**Supplementary Table 3.** Loadings of environmental variables (a), shape markers (b) and armour variables (c) for PCAs used in downstream analyses.

|                        | PC1           | PC2           | PC3           | PC4           | Total % variance explained |
|------------------------|---------------|---------------|---------------|---------------|----------------------------|
| <i>a) Environment</i>  |               |               |               |               |                            |
| pH                     | <b>0.579</b>  | -0.168        | 0.165         | 0.042         |                            |
| Zn                     | 0.389         | <b>0.590</b>  | -0.124        | 0.053         |                            |
| Na                     | 0.202         | 0.366         | <b>0.608</b>  | <b>0.414</b>  |                            |
| Ca                     | <b>0.404</b>  | <b>-0.416</b> | <b>0.401</b>  | -0.233        |                            |
| Lake Area              | 0.255         | -0.062        | <b>-0.509</b> | <b>0.639</b>  |                            |
| Gyro                   | <b>0.409</b>  | -0.349        | -0.335        | -0.078        |                            |
| Schisto                | 0.278         | <b>0.437</b>  | -0.236        | <b>-0.596</b> |                            |
| variance explained (%) | 31.4          | 22.4          | 16.9          | 14.3          | 85                         |
| <i>b) Body shape</i>   |               |               |               |               |                            |
| RegResid1              | 0.115         | -0.217        | 0.061         |               |                            |
| RegResid2              | 0.058         | -0.095        | -0.038        |               |                            |
| RegResid3              | 0.154         | <b>-0.417</b> | -0.023        |               |                            |
| RegResid4              | -0.073        | 0.153         | -0.093        |               |                            |
| RegResid5              | <b>-0.479</b> | 0.024         | -0.076        |               |                            |
| RegResid6              | 0.194         | -0.047        | <b>0.310</b>  |               |                            |
| RegResid7              | 0.005         | 0.007         | <b>0.615</b>  |               |                            |
| RegResid8              | -0.028        | 0.068         | -0.079        |               |                            |
| RegResid9              | <b>0.262</b>  | -0.047        | -0.245        |               |                            |
| RegResid10             | -0.078        | 0.106         | -0.028        |               |                            |
| RegResid11             | <b>0.269</b>  | 0.052         | <b>-0.304</b> |               |                            |
| RegResid12             | -0.081        | 0.079         | -0.056        |               |                            |
| RegResid13             | 0.253         | -0.038        | -0.257        |               |                            |
| RegResid14             | -0.015        | -0.014        | -0.040        |               |                            |
| RegResid15             | -0.039        | -0.002        | <b>0.463</b>  |               |                            |
| RegResid16             | 0.018         | -0.104        | 0.080         |               |                            |
| RegResid17             | <b>-0.632</b> | <b>-0.369</b> | -0.169        |               |                            |
| RegResid18             | 0.099         | -0.129        | -0.069        |               |                            |
| RegResid19             | -0.001        | <b>0.569</b>  | -0.058        |               |                            |
| RegResid20             | 0.116         | -0.251        | -0.025        |               |                            |
| RegResid21             | 0.078         | -0.026        | 0.000         |               |                            |
| RegResid22             | -0.054        | 0.018         | -0.001        |               |                            |
| RegResid23             | 0.115         | 0.121         | 0.059         |               |                            |
| RegResid24             | -0.093        | 0.041         | -0.047        |               |                            |
| RegResid25             | -0.098        | <b>0.342</b>  | -0.066        |               |                            |
| RegResid26             | -0.063        | 0.174         | 0.084         |               |                            |
| variance explained (%) | 29.000        | 20.600        | 16.500        |               | 66.1                       |

*c) Armour*

|                        |              |               |               |               |      |
|------------------------|--------------|---------------|---------------|---------------|------|
| DS1                    | <b>0.403</b> | -0.316        | <b>0.440</b>  | 0.201         |      |
| DS2                    | <b>0.407</b> | -0.328        | <b>0.428</b>  | 0.033         |      |
| PS                     | <b>0.458</b> | 0.238         | 0.039         | 0.152         |      |
| LP                     | 0.349        | <b>0.555</b>  | -0.094        | -0.014        |      |
| HP                     | <b>0.432</b> | 0.379         | -0.174        | -0.076        |      |
| BAP                    | 0.294        | -0.324        | -0.253        | <b>-0.843</b> |      |
| Plate_N                | 0.260        | <b>-0.424</b> | <b>-0.720</b> | <b>0.467</b>  |      |
| variance explained (%) | 53.7         | 14.5          | 11            | 10.3          | 89.5 |

---

**Supplementary Table 4.** Results of ANOVAs for two first PCs of armour and three PCs of body shape for fish from different lakes and radiations. Significant P-values in bold

|                   | Df   | Sum Sq  | Mean Sq  | F-value | Pr(>F)           |
|-------------------|------|---------|----------|---------|------------------|
| <i>Armour_PC1</i> |      |         |          |         |                  |
| Radiation         | 3    | 331     | 110.36   | 180.36  | <b>&lt;0.001</b> |
| Lake              | 69   | 3805    | 55.14    | 90.12   | <b>&lt;0.001</b> |
| Residuals         | 1226 | 750     | 0.61     |         |                  |
| <i>Armour_PC2</i> |      |         |          |         |                  |
| Radiation         | 3    | 146.8   | 48.94    | 166.12  | <b>&lt;0.001</b> |
| Lake              | 69   | 807.5   | 11.7     | 39.72   | <b>&lt;0.001</b> |
| Residuals         | 1226 | 361.2   | 0.29     |         |                  |
| <i>Shape_PC1</i>  |      |         |          |         |                  |
| Radiation         | 3    | 0.13962 | 0.04654  | 686.77  | <b>&lt;0.001</b> |
| Lake              | 69   | 0.17873 | 0.00259  | 38.22   | <b>&lt;0.001</b> |
| Residuals         | 1223 | 0.08288 | 0.00007  |         |                  |
| <i>Shape_PC2</i>  |      |         |          |         |                  |
| Radiation         | 3    | 0.06767 | 0.022555 | 173.817 | <b>&lt;0.001</b> |
| Lake              | 69   | 0.05938 | 0.000861 | 6.632   | <b>&lt;0.001</b> |
| Residuals         | 1223 | 0.1587  | 0.00013  |         |                  |
| <i>Shape_PC3</i>  |      |         |          |         |                  |
| Radiation         | 3    | 0.0542  | 0.018067 | 232.41  | <b>&lt;0.001</b> |
| Lake              | 69   | 0.07891 | 0.001144 | 14.71   | <b>&lt;0.001</b> |
| Residuals         | 1223 | 0.09507 | 0.000078 |         |                  |



**Supplementary Table 5.** Mean values of  $\theta$  (angle between vectors) calculated within (Rad1 == Rad2) and between radiations for marine-freshwater phenotype vectors (armour, shape and gill rakers). P-values were calculated by comparing the distribution of within-radiation vectors (Rad1) compared with between-radiation vectors using T-Tests. Data is missing for Scottish marine gill rakers, therefore these comparisons are absent.

| Rad1     | Rad2     | Mean $\theta$ (°) | Trait       | P-value |
|----------|----------|-------------------|-------------|---------|
| Alaska   | Alaska   | 12.162            | Armour      | 1.000   |
| BC       | Alaska   | 22.635            | Armour      | 0.000   |
| Iceland  | Alaska   | 16.391            | Armour      | 0.000   |
| Scotland | Alaska   | 16.743            | Armour      | 0.000   |
| Alaska   | BC       | 22.635            | Armour      | 0.000   |
| BC       | BC       | 28.319            | Armour      | 1.000   |
| Iceland  | BC       | 25.901            | Armour      | 0.000   |
| Scotland | BC       | 26.338            | Armour      | 0.000   |
| Alaska   | Iceland  | 16.391            | Armour      | 0.000   |
| BC       | Iceland  | 25.901            | Armour      | 0.121   |
| Iceland  | Iceland  | 8.963             | Armour      | 1.000   |
| Scotland | Iceland  | 9.100             | Armour      | 0.643   |
| Alaska   | Scotland | 16.743            | Armour      | 0.000   |
| BC       | Scotland | 26.338            | Armour      | 0.201   |
| Iceland  | Scotland | 9.100             | Armour      | 0.829   |
| Scotland | Scotland | 8.896             | Armour      | 1.000   |
| Alaska   | Alaska   | 29.985            | Shape       | 1.000   |
| BC       | Alaska   | 45.123            | Shape       | 0.000   |
| Iceland  | Alaska   | 64.835            | Shape       | 0.000   |
| Scotland | Alaska   | 44.952            | Shape       | 0.000   |
| Alaska   | BC       | 45.123            | Shape       | 0.000   |
| BC       | BC       | 36.929            | Shape       | 1.000   |
| Iceland  | BC       | 71.354            | Shape       | 0.000   |
| Scotland | BC       | 57.771            | Shape       | 0.000   |
| Alaska   | Iceland  | 64.835            | Shape       | 0.000   |
| BC       | Iceland  | 71.354            | Shape       | 0.000   |
| Iceland  | Iceland  | 51.227            | Shape       | 1.000   |
| Scotland | Iceland  | 72.782            | Shape       | 0.000   |
| Alaska   | Scotland | 44.952            | Shape       | 0.000   |
| BC       | Scotland | 57.771            | Shape       | 0.000   |
| Iceland  | Scotland | 72.782            | Shape       | 0.000   |
| Scotland | Scotland | 36.019            | Shape       | 1.000   |
| Alaska   | Alaska   | 7.796             | Gill rakers | 1.000   |
| BC       | Alaska   | 19.515            | Gill rakers | 0.000   |
| Iceland  | Alaska   | 9.891             | Gill rakers | 0.011   |
| Scotland | Alaska   | NA                | Gill rakers | NA      |
| Alaska   | BC       | 19.515            | Gill rakers | 0.000   |
| BC       | BC       | 27.799            | Gill rakers | 1.000   |

|          |          |        |             |       |
|----------|----------|--------|-------------|-------|
| Iceland  | BC       | 20.743 | Gill rakers | 0.000 |
| Scotland | BC       | NA     | Gill rakers | NA    |
| Alaska   | Iceland  | 9.891  | Gill rakers | 0.001 |
| BC       | Iceland  | 20.743 | Gill rakers | 0.003 |
| Iceland  | Iceland  | 12.308 | Gill rakers | 1.000 |
| Scotland | Iceland  | NA     | Gill rakers | NA    |
| Alaska   | Scotland | NA     | Gill rakers | NA    |
| BC       | Scotland | NA     | Gill rakers | NA    |
| Iceland  | Scotland | NA     | Gill rakers | NA    |
| Scotland | Scotland | NA     | Gill rakers | NA    |

---

**Supplementary Table 6.** ANCOVA modelling of environment x phenotype interactions across adaptive radiations. Each phenotype was modelled against all environment variables, and in each case five models were compared that included the environmental variable and radiation as explanatory variables. Models increased in complexity from null (~1) to full interaction (Env \* Radiation). The best model was chosen on the basis of lowest AIC, with a difference of >2 required for a more complex model to be favoured over a simpler model. ANCOVA results are summarised for the best model. NA values here reflect the null model. All p-values were FDR-corrected.

| Phenotype  | Env.      | Null         | Intercept (Radiation) | Slope (Env) | Intercept + Slope | Intercept * Slope | Best Model Variables | df   | F      | p        | Variance Explained | fdr      |
|------------|-----------|--------------|-----------------------|-------------|-------------------|-------------------|----------------------|------|--------|----------|--------------------|----------|
| Armour PC1 | Ca        | 295.7        | 295.7                 | 294.1       | 293.1             | <b>281.8</b>      | Ca                   | 1,71 | 4.625  | 3.52E-02 | 0.296              | 4.50E-02 |
|            |           |              |                       |             |                   |                   | Radiation            | 3,68 | 2.778  | 4.81E-02 | 0.296              | 5.56E-02 |
|            |           |              |                       |             |                   |                   | Ca: Radiation        | 3,65 | 5.787  | 1.43E-03 | 0.296              | 2.76E-03 |
| Armour PC1 | Gyro      | <b>295.7</b> | 295.7                 | 296.3       | 297.1             | 301.7             | NA                   | NA   | NA     | NA       | NA                 | NA       |
| Armour PC1 | Na        | 295.7        | 295.7                 | 297.7       | 296.6             | <b>285.7</b>      | Na                   | 1,71 | 0.002  | 9.64E-01 | 0.26               | 9.64E-01 |
|            |           |              |                       |             |                   |                   | Radiation            | 3,68 | 2.804  | 4.66E-02 | 0.26               | 5.51E-02 |
|            |           |              |                       |             |                   |                   | Na: Radiation        | 3,65 | 5.641  | 1.69E-03 | 0.26               | 3.14E-03 |
| Armour PC1 | pH        | 295.7        | 295.7                 | 288.8       | 289.8             | 290.4             | pH                   | 1,71 | 9.2    | 3.38E-03 | 0.113              | 5.86E-03 |
| Armour PC1 | Schisto   | <b>295.7</b> | 295.7                 | 297.4       | 297.4             | 301.9             | NA                   | NA   | NA     | NA       | NA                 | NA       |
| Armour PC1 | Zn        | <b>295.7</b> | 295.7                 | 297.4       | 297.1             | 295.8             | NA                   | NA   | NA     | NA       | NA                 | NA       |
| Armour PC1 | Lake_Area | 295.7        | 295.7                 | 293.7       | 295.5             | <b>291.5</b>      | Lake_Area            | 1,71 | 4.435  | 3.91E-02 | 0.204              | 4.73E-02 |
|            |           |              |                       |             |                   |                   | Radiation            | 3,68 | 1.49   | 2.26E-01 | 0.204              | 2.35E-01 |
|            |           |              |                       |             |                   |                   | Lake_Area: Radiation | 3,65 | 3.174  | 2.99E-02 | 0.204              | 3.99E-02 |
| Armour PC2 | Ca        | 189.9        | 184.1                 | 189.6       | 177.4             | <b>171.2</b>      | Ca                   | 1,71 | 3.191  | 7.87E-02 | 0.338              | 8.53E-02 |
|            |           |              |                       |             |                   |                   | Radiation            | 3,68 | 7.241  | 2.89E-04 | 0.338              | 6.27E-04 |
|            |           |              |                       |             |                   |                   | Ca: Radiation        | 3,65 | 3.94   | 1.20E-02 | 0.338              | 1.74E-02 |
| Armour PC2 | Gyro      | 189.9        | <b>184.1</b>          | 191.8       | 185.7             | 191.5             | Radiation            | 3,69 | 4.018  | 1.07E-02 | 0.143              | 1.60E-02 |
| Armour PC2 | Na        | 189.9        | 184.1                 | 187.4       | 186.1             | <b>178.1</b>      | Na                   | 1,71 | 5.568  | 2.13E-02 | 0.277              | 2.92E-02 |
|            |           |              |                       |             |                   |                   | Radiation            | 3,68 | 2.749  | 4.98E-02 | 0.277              | 5.63E-02 |
|            |           |              |                       |             |                   |                   | Na: Radiation        | 3,65 | 4.59   | 5.63E-03 | 0.277              | 9.44E-03 |
| Armour PC2 | pH        | 189.9        | 184.1                 | 190.2       | 180.2             | <b>176.7</b>      | pH                   | 1,71 | 2.171  | 1.45E-01 | 0.289              | 1.54E-01 |
|            |           |              |                       |             |                   |                   | Radiation            | 3,68 | 6.038  | 1.08E-03 | 0.289              | 2.17E-03 |
|            |           |              |                       |             |                   |                   | pH: Radiation        | 3,65 | 3.016  | 3.62E-02 | 0.289              | 4.50E-02 |
| Armour PC2 | Schisto   | 189.9        | <b>184.1</b>          | 190.9       | 185.9             | 191.1             | Radiation            | 3,69 | 4.018  | 1.07E-02 | 0.143              | 1.60E-02 |
| Armour PC2 | Zn        | 189.9        | <b>184.1</b>          | 189.8       | 185.8             | 189.2             | Radiation            | 3,69 | 4.018  | 1.07E-02 | 0.143              | 1.60E-02 |
| Armour PC2 | Lake_Area | 189.9        | <b>184.1</b>          | 191.9       | 186.1             | 188.7             | Radiation            | 3,69 | 4.018  | 1.07E-02 | 0.143              | 1.60E-02 |
| Shape PC1  | Ca        | -396.3       | <b>-430.7</b>         | -401.6      | -431.5            | -425.9            | Radiation            | 3,69 | 17.004 | 2.27E-08 | 0.415              | 5.61E-08 |
| Shape PC1  | Gyro      | -396.3       | -430.7                | -395        | -431.2            | <b>-434.8</b>     | Gyro                 | 1,71 | 1.341  | 2.51E-01 | 0.487              | 2.56E-01 |
|            |           |              |                       |             |                   |                   | Radiation            | 3,68 | 19.34  | 4.50E-09 | 0.487              | 1.56E-08 |
|            |           |              |                       |             |                   |                   | Gyro: Radiation      | 3,65 | 3.012  | 3.63E-02 | 0.487              | 4.50E-02 |
| Shape PC1  | Na        | -396.3       | -430.7                | -398        | <b>-435.5</b>     | -435.2            | Na                   | 1,71 | 6.51   | 1.30E-02 | 0.462              | 1.82E-02 |

|              |               |               |               |        |               |               |                  |      |        |          |       |          |
|--------------|---------------|---------------|---------------|--------|---------------|---------------|------------------|------|--------|----------|-------|----------|
|              |               |               |               |        |               |               | Radiation        | 3,68 | 18.432 | 7.40E-09 | 0.462 | 2.40E-08 |
| Shape PC1    | pH            | -396.3        | <b>-430.7</b> | -402   | -429.8        | -427.3        | Radiation        | 3,69 | 17.004 | 2.27E-08 | 0.415 | 5.61E-08 |
| Shape PC1    | Schisto       | -396.3        | <b>-430.7</b> | -394.3 | -428.7        | -423.6        | Radiation        | 3,69 | 17.004 | 2.27E-08 | 0.415 | 5.61E-08 |
| Shape PC1    | Zn            | -396.3        | <b>-430.7</b> | -394.4 | -429.2        | -424.1        | Radiation        | 3,69 | 17.004 | 2.27E-08 | 0.415 | 5.61E-08 |
| Shape PC1    | Lake_A<br>rea | -396.3        | <b>-430.7</b> | -395.1 | -428.8        | -430.6        | Radiation        | 3,69 | 17.004 | 2.27E-08 | 0.415 | 5.61E-08 |
| Shape PC2    | Ca            | -461.1        | <b>-511</b>   | -459.6 | -509          | -509.5        | Radiation        | 3,69 | 26.464 | 1.67E-11 | 0.524 | 1.24E-10 |
| Shape PC2    | Gyro          | -461.1        | <b>-511</b>   | -459.7 | -510.3        | -507.3        | Radiation        | 3,69 | 26.464 | 1.67E-11 | 0.524 | 1.24E-10 |
| Shape PC2    | Na            | -461.1        | <b>-511</b>   | -466.3 | -512.3        | -509.8        | Radiation        | 3,69 | 26.464 | 1.67E-11 | 0.524 | 1.24E-10 |
| Shape PC2    | pH            | -461.1        | <b>-511</b>   | -461.7 | -509.1        | -505.8        | Radiation        | 3,69 | 26.464 | 1.67E-11 | 0.524 | 1.24E-10 |
| Shape PC2    | Schisto       | -461.1        | -511          | -484.5 | <b>-514.6</b> | -509.8        | Schisto          | 1,71 | 46.443 | 3.05E-09 | 0.555 | 1.13E-08 |
|              |               |               |               |        |               |               | Radiation        | 3,68 | 14.473 | 2.17E-07 | 0.555 | 5.13E-07 |
| Shape PC2    | Zn            | -461.1        | -511          | -495.6 | -509          | <b>-519.4</b> | Zn               | 1,71 | 68.997 | 8.34E-12 | 0.605 | 1.24E-10 |
|              |               |               |               |        |               |               | Radiation<br>Zn: | 3,68 | 8.247  | 9.94E-05 | 0.605 | 2.25E-04 |
|              |               |               |               |        |               |               | Radiation        | 3,65 | 5.473  | 2.04E-03 | 0.605 | 3.67E-03 |
| Shape PC2    | Lake_A<br>rea | -461.1        | <b>-511</b>   | -459.8 | -509.1        | -504.5        | Radiation        | 3,69 | 26.464 | 1.67E-11 | 0.524 | 1.24E-10 |
| Gill Raker N | Ca            | 282.1         | <b>235.5</b>  | 281.8  | 236.9         | 236.8         | Radiation        | 3,69 | 24.259 | 7.88E-11 | 0.503 | 3.15E-10 |
| Gill Raker N | Gyro          | 282.1         | 235.5         | 282.2  | <b>231.1</b>  | 230.9         | Gyro             | 1,71 | 3.782  | 5.59E-02 | 0.54  | 6.19E-02 |
|              |               |               |               |        |               |               | Radiation        | 3,68 | 26.917 | 1.37E-11 | 0.54  | 1.24E-10 |
| Gill Raker N | Na            | 282.1         | <b>235.5</b>  | 270.9  | 237.1         | 241.3         | Radiation        | 3,69 | 24.259 | 7.88E-11 | 0.503 | 3.15E-10 |
| Gill Raker N | pH            | 282.1         | <b>235.5</b>  | 283.3  | 237.4         | 240.5         | Radiation        | 3,69 | 24.259 | 7.88E-11 | 0.503 | 3.15E-10 |
| Gill Raker N | Schisto       | 282.1         | <b>235.5</b>  | 276.4  | 237           | 238.7         | Radiation        | 3,69 | 24.259 | 7.88E-11 | 0.503 | 3.15E-10 |
| Gill Raker N | Zn            | 282.1         | 235.5         | 243.9  | <b>232.1</b>  | 234.9         | Zn               | 1,71 | 63.613 | 2.42E-11 | 0.534 | 1.58E-10 |
|              |               |               |               |        |               |               | Radiation        | 3,68 | 6.289  | 7.88E-04 | 0.534 | 1.64E-03 |
| Gill Raker N | Lake_A<br>rea | 282.1         | <b>235.5</b>  | 284    | 235.5         | 237.5         | Radiation        | 3,69 | 24.259 | 7.88E-11 | 0.503 | 3.15E-10 |
| Gill Raker L | Ca            | <b>-120.2</b> | -114.8        | -118.3 | -112.8        | -120.2        | NA               | NA   | NA     | NA       | NA    | NA       |
| Gill Raker L | Gyro          | <b>-120.2</b> | -114.8        | -118.4 | -113.2        | -109.8        | NA               | NA   | NA     | NA       | NA    | NA       |
| Gill Raker L | Na            | <b>-120.2</b> | -114.8        | -119.3 | -115.5        | -111.5        | NA               | NA   | NA     | NA       | NA    | NA       |
| Gill Raker L | pH            | <b>-120.2</b> | -114.8        | -118.2 | -112.9        | -110.8        | NA               | NA   | NA     | NA       | NA    | NA       |
| Gill Raker L | Schisto       | <b>-120.2</b> | -114.8        | -121   | -115.3        | -110.2        | NA               | NA   | NA     | NA       | NA    | NA       |
| Gill Raker L | Zn            | <b>-120.2</b> | -114.8        | -118.6 | -112.9        | -108.7        | NA               | NA   | NA     | NA       | NA    | NA       |
| Gill Raker L | Lake_A<br>rea | <b>-120.2</b> | -114.8        | -119.8 | -115.1        | -111.2        | NA               | NA   | NA     | NA       | NA    | NA       |

**Supplementary Table 7.**  $F_{ST}$  values among the four countries based on 8,395 SNPs with no Chr XIX. Within radiations, individuals from different populations were pooled in order to estimate the  $F_{ST}$  values between radiations.

|          | Iceland | B.C.  | Alaska |
|----------|---------|-------|--------|
| Scotland | 0.194   | 0.338 | 0.329  |
| Iceland  |         | 0.323 | 0.314  |
| B.C.     |         |       | 0.198  |

**Supplementary Table 8.** Results of AMOVA over all populations. Individuals were nested within populations (Pop), within radiations (Rad), within continents.

|                                         | Sigma    | %      |
|-----------------------------------------|----------|--------|
| Variations Between Continent            | 889.741  | 34.748 |
| Variations Between Rad Within Continent | 142.320  | 5.558  |
| Variations Between Pop Within Rad       | 366.516  | 14.314 |
| Variations Between samples Within Pop   | 228.970  | 8.942  |
| Variations Within samples               | 932.972  | 36.437 |
| Total variations                        | 2560.519 | 100    |

**Supplementary Table 9.** Numbers of SNPs and windows associated with each of 12 phenotypic traits and 7 environmental variables in the four independent adaptive radiations.

| Location | Variable     | Associated<br>SNP N | Associated Window N |     |      |      |        |
|----------|--------------|---------------------|---------------------|-----|------|------|--------|
|          |              |                     | 50k                 | 75k | 100k | 200k | 0.1 cM |
| Alaska   | Ca           | 715                 | 84                  | 80  | 74   | 51   | 56     |
| Alaska   | Gyro         | 166                 | 27                  | 27  | 24   | 23   | 23     |
| Alaska   | Na           | 205                 | 40                  | 34  | 35   | 31   | 29     |
| Alaska   | pH           | 305                 | 42                  | 42  | 40   | 35   | 31     |
| Alaska   | Schisto      | 226                 | 43                  | 43  | 37   | 33   | 33     |
| Alaska   | Zn           | 285                 | 43                  | 42  | 41   | 34   | 35     |
| Alaska   | Lake_Area    | 13                  | 13                  | 13  | 12   | 9    | 7      |
| Alaska   | Shape_PC1    | 152                 | 36                  | 36  | 33   | 32   | 23     |
| Alaska   | Shape_PC2    | 242                 | 52                  | 45  | 39   | 30   | 34     |
| Alaska   | Shape_PC3    | 205                 | 43                  | 42  | 37   | 29   | 31     |
| Alaska   | DS1          | 259                 | 50                  | 43  | 43   | 37   | 31     |
| Alaska   | DS2          | 179                 | 33                  | 30  | 29   | 28   | 31     |
| Alaska   | PS           | 470                 | 63                  | 58  | 59   | 41   | 43     |
| Alaska   | LP           | 682                 | 81                  | 70  | 63   | 47   | 59     |
| Alaska   | HP           | 544                 | 65                  | 60  | 48   | 36   | 47     |
| Alaska   | BAP          | 453                 | 62                  | 56  | 56   | 41   | 41     |
| Alaska   | Plate_N      | 424                 | 69                  | 65  | 59   | 40   | 42     |
| Alaska   | Gill_Raker_L | 344                 | 57                  | 54  | 49   | 39   | 41     |
| Alaska   | Gill_Raker_N | 104                 | 28                  | 23  | 20   | 20   | 19     |
| BC       | Ca           | 750                 | 75                  | 68  | 60   | 41   | 46     |
| BC       | Gyro         | 457                 | 55                  | 61  | 53   | 44   | 36     |
| BC       | Na           | 921                 | 136                 | 123 | 109  | 96   | 77     |
| BC       | pH           | 620                 | 61                  | 61  | 53   | 33   | 40     |
| BC       | Schisto      | 243                 | 38                  | 38  | 33   | 28   | 34     |
| BC       | Zn           | 96                  | 30                  | 27  | 23   | 19   | 20     |
| BC       | Lake_Area    | 154                 | 34                  | 34  | 32   | 30   | 23     |
| BC       | Shape_PC1    | 116                 | 21                  | 16  | 12   | 10   | 15     |
| BC       | Shape_PC2    | 433                 | 43                  | 45  | 40   | 30   | 31     |
| BC       | Shape_PC3    | 365                 | 45                  | 45  | 45   | 36   | 36     |
| BC       | DS1          | 966                 | 130                 | 120 | 113  | 91   | 85     |
| BC       | DS2          | 875                 | 134                 | 122 | 115  | 94   | 83     |
| BC       | PS           | 991                 | 146                 | 136 | 126  | 98   | 90     |
| BC       | LP           | 942                 | 145                 | 130 | 119  | 101  | 84     |
| BC       | HP           | 641                 | 93                  | 89  | 77   | 64   | 61     |
| BC       | BAP          | 386                 | 54                  | 52  | 47   | 31   | 39     |
| BC       | Plate_N      | 709                 | 129                 | 114 | 101  | 79   | 72     |

|          |              |     |     |     |     |    |    |
|----------|--------------|-----|-----|-----|-----|----|----|
| BC       | Gill_Raker_L | 617 | 64  | 69  | 62  | 52 | 46 |
| BC       | Gill_Raker_N | 936 | 138 | 118 | 113 | 86 | 74 |
| Iceland  | Ca           | 142 | 32  | 30  | 29  | 21 | 20 |
| Iceland  | Gyro         | 380 | 45  | 44  | 34  | 26 | 36 |
| Iceland  | Na           | 180 | 38  | 34  | 29  | 21 | 27 |
| Iceland  | pH           | 391 | 59  | 57  | 53  | 40 | 43 |
| Iceland  | Schisto      | 432 | 56  | 57  | 53  | 40 | 46 |
| Iceland  | Zn           | 395 | 48  | 48  | 40  | 24 | 37 |
| Iceland  | Lake_Area    | 400 | 43  | 41  | 37  | 19 | 30 |
| Iceland  | Shape_PC1    | 569 | 59  | 51  | 48  | 32 | 46 |
| Iceland  | Shape_PC2    | 200 | 39  | 34  | 30  | 22 | 31 |
| Iceland  | Shape_PC3    | 215 | 37  | 33  | 27  | 21 | 28 |
| Iceland  | DS1          | 158 | 29  | 28  | 25  | 23 | 24 |
| Iceland  | DS2          | 148 | 26  | 24  | 20  | 18 | 21 |
| Iceland  | PS           | 511 | 53  | 51  | 43  | 27 | 38 |
| Iceland  | LP           | 306 | 38  | 40  | 40  | 29 | 32 |
| Iceland  | HP           | 252 | 49  | 39  | 43  | 28 | 32 |
| Iceland  | BAP          | 332 | 36  | 37  | 31  | 21 | 30 |
| Iceland  | Plate_N      | 194 | 41  | 37  | 34  | 28 | 26 |
| Iceland  | Gill_Raker_L | 209 | 38  | 34  | 34  | 27 | 27 |
| Iceland  | Gill_Raker_N | 296 | 45  | 46  | 46  | 42 | 35 |
| Scotland | Ca           | 324 | 36  | 37  | 37  | 30 | 30 |
| Scotland | Gyro         | 301 | 23  | 23  | 20  | 16 | 17 |
| Scotland | Na           | 495 | 43  | 38  | 43  | 31 | 34 |
| Scotland | pH           | 401 | 42  | 40  | 38  | 30 | 29 |
| Scotland | Schisto      | 541 | 46  | 35  | 39  | 28 | 28 |
| Scotland | Zn           | 87  | 26  | 19  | 17  | 10 | 20 |
| Scotland | Lake_Area    | 20  | 11  | 10  | 9   | 8  | 6  |
| Scotland | Shape_PC1    | 127 | 33  | 28  | 20  | 15 | 16 |
| Scotland | Shape_PC2    | 697 | 51  | 54  | 48  | 40 | 50 |
| Scotland | Shape_PC3    | 47  | 23  | 20  | 12  | 6  | 20 |
| Scotland | DS1          | 154 | 24  | 23  | 19  | 17 | 22 |
| Scotland | DS2          | 197 | 34  | 34  | 25  | 19 | 33 |
| Scotland | PS           | 385 | 37  | 33  | 31  | 33 | 28 |
| Scotland | LP           | 204 | 35  | 30  | 26  | 25 | 20 |
| Scotland | HP           | 394 | 49  | 43  | 44  | 34 | 25 |
| Scotland | BAP          | 275 | 34  | 34  | 37  | 28 | 40 |
| Scotland | Plate_N      | 334 | 41  | 37  | 43  | 36 | 33 |
| Scotland | Gill_Raker_L | 44  | 25  | 15  | 16  | 8  | 15 |
| Scotland | Gill_Raker_N | 351 | 44  | 40  | 40  | 32 | 27 |



**Supplementary Table 10.** Results for permuted (10,000 runs) parallelism across all radiations. Results are shown for each group of radiations compared, with the permuted expected, observed parallel, and FDR-corrected p-value. Significant parallelism is assumed when  $FDR < 0.05$ .

| Variable | Comparison                  | Expected | Observed | FDR      |
|----------|-----------------------------|----------|----------|----------|
| Ca       | All 4                       | 0        | 0        | 1        |
| Ca       | Alaska & BC & Iceland       | 0.003    | 0        | 1        |
| Ca       | Alaska & BC & Scotland      | 0.005    | 0        | 1        |
| Ca       | Alaska & Iceland & Scotland | 0.002    | 0        | 1        |
| Ca       | BC & Iceland & Scotland     | 0.001    | 0        | 1        |
| Ca       | Alaska & BC                 | 0.94     | 6        | 5.00E-04 |
| Ca       | Alaska & Iceland            | 0.368    | 3        | 0.0047   |
| Ca       | Alaska & Scotland           | 0.428    | 1        | 0.3535   |
| Ca       | BC & Iceland                | 0.325    | 0        | 1        |
| Ca       | BC & Scotland               | 0.372    | 1        | 0.31     |
| Ca       | Iceland & Scotland          | 0.171    | 3        | 7.00E-04 |
| Gyro     | All 4                       | 0        | 0        | 1        |
| Gyro     | Alaska & BC & Iceland       | 0.001    | 0        | 1        |
| Gyro     | Alaska & BC & Scotland      | 0.001    | 0        | 1        |
| Gyro     | Alaska & Iceland & Scotland | 0.001    | 0        | 1        |
| Gyro     | BC & Iceland & Scotland     | 0.001    | 0        | 1        |
| Gyro     | Alaska & BC                 | 0.224    | 2        | 0.0216   |
| Gyro     | Alaska & Iceland            | 0.18     | 0        | 1        |
| Gyro     | Alaska & Scotland           | 0.086    | 0        | 1        |
| Gyro     | BC & Iceland                | 0.353    | 1        | 0.2999   |
| Gyro     | BC & Scotland               | 0.18     | 1        | 0.1646   |
| Gyro     | Iceland & Scotland          | 0.155    | 0        | 1        |
| Na       | All 4                       | 0        | 0        | 1        |
| Na       | Alaska & BC & Iceland       | 0.004    | 0        | 1        |
| Na       | Alaska & BC & Scotland      | 0.004    | 0        | 1        |
| Na       | Alaska & Iceland & Scotland | 0.001    | 0        | 1        |
| Na       | BC & Iceland & Scotland     | 0.004    | 0        | 1        |
| Na       | Alaska & BC                 | 0.803    | 1        | 0.5608   |
| Na       | Alaska & Iceland            | 0.209    | 0        | 1        |
| Na       | Alaska & Scotland           | 0.229    | 0        | 1        |
| Na       | BC & Iceland                | 0.72     | 1        | 0.5219   |
| Na       | BC & Scotland               | 0.832    | 1        | 0.5686   |
| Na       | Iceland & Scotland          | 0.254    | 1        | 0.2275   |
| pH       | All 4                       | 0        | 0        | 1        |
| pH       | Alaska & BC & Iceland       | 0.003    | 0        | 1        |
| pH       | Alaska & BC & Scotland      | 0.002    | 0        | 1        |
| pH       | Alaska & Iceland & Scotland | 0.002    | 0        | 1        |

|           |                             |       |   |          |
|-----------|-----------------------------|-------|---|----------|
| pH        | BC & Iceland & Scotland     | 0.003 | 0 | 1        |
| pH        | Alaska & BC                 | 0.375 | 1 | 0.3132   |
| pH        | Alaska & Iceland            | 0.333 | 0 | 1        |
| pH        | Alaska & Scotland           | 0.252 | 0 | 1        |
| pH        | BC & Iceland                | 0.504 | 2 | 0.0895   |
| pH        | BC & Scotland               | 0.341 | 1 | 0.2921   |
| pH        | Iceland & Scotland          | 0.371 | 5 | 1.00E-04 |
| Schisto   | All 4                       | 0     | 0 | 1        |
| Schisto   | Alaska & BC & Iceland       | 0.002 | 0 | 1        |
| Schisto   | Alaska & BC & Scotland      | 0.002 | 0 | 1        |
| Schisto   | Alaska & Iceland & Scotland | 0.002 | 0 | 1        |
| Schisto   | BC & Iceland & Scotland     | 0.001 | 0 | 1        |
| Schisto   | Alaska & BC                 | 0.239 | 1 | 0.2166   |
| Schisto   | Alaska & Iceland            | 0.337 | 1 | 0.2921   |
| Schisto   | Alaska & Scotland           | 0.278 | 0 | 1        |
| Schisto   | BC & Iceland                | 0.289 | 2 | 0.0325   |
| Schisto   | BC & Scotland               | 0.244 | 1 | 0.2196   |
| Schisto   | Iceland & Scotland          | 0.386 | 0 | 1        |
| Zn        | All 4                       | 0     | 0 | 1        |
| Zn        | Alaska & BC & Iceland       | 0.001 | 0 | 1        |
| Zn        | Alaska & BC & Scotland      | 0.001 | 0 | 1        |
| Zn        | Alaska & Iceland & Scotland | 0.001 | 0 | 1        |
| Zn        | BC & Iceland & Scotland     | 0     | 0 | 1        |
| Zn        | Alaska & BC                 | 0.183 | 1 | 0.1688   |
| Zn        | Alaska & Iceland            | 0.294 | 1 | 0.2553   |
| Zn        | Alaska & Scotland           | 0.16  | 0 | 1        |
| Zn        | BC & Iceland                | 0.2   | 0 | 1        |
| Zn        | BC & Scotland               | 0.114 | 1 | 0.1078   |
| Zn        | Iceland & Scotland          | 0.187 | 0 | 1        |
| Lake_Area | All 4                       | 0     | 0 | 1        |
| Lake_Area | Alaska & BC & Iceland       | 0.001 | 0 | 1        |
| Lake_Area | Alaska & BC & Scotland      | 0     | 0 | 1        |
| Lake_Area | Alaska & Iceland & Scotland | 0     | 0 | 1        |
| Lake_Area | BC & Iceland & Scotland     | 0     | 0 | 1        |
| Lake_Area | Alaska & BC                 | 0.064 | 0 | 1        |
| Lake_Area | Alaska & Iceland            | 0.08  | 0 | 1        |
| Lake_Area | Alaska & Scotland           | 0.02  | 0 | 1        |
| Lake_Area | BC & Iceland                | 0.204 | 0 | 1        |
| Lake_Area | BC & Scotland               | 0.056 | 0 | 1        |
| Lake_Area | Iceland & Scotland          | 0.073 | 0 | 1        |
| Shape_PC1 | All 4                       | 0     | 0 | 1        |

|           |                             |       |   |        |
|-----------|-----------------------------|-------|---|--------|
| Shape_PC1 | Alaska & BC & Iceland       | 0.001 | 0 | 1      |
| Shape_PC1 | Alaska & BC & Scotland      | 0.001 | 0 | 1      |
| Shape_PC1 | Alaska & Iceland & Scotland | 0.001 | 0 | 1      |
| Shape_PC1 | BC & Iceland & Scotland     | 0.001 | 0 | 1      |
| Shape_PC1 | Alaska & BC                 | 0.116 | 0 | 1      |
| Shape_PC1 | Alaska & Iceland            | 0.301 | 0 | 1      |
| Shape_PC1 | Alaska & Scotland           | 0.162 | 1 | 0.1508 |
| Shape_PC1 | BC & Iceland                | 0.167 | 1 | 0.1556 |
| Shape_PC1 | BC & Scotland               | 0.098 | 0 | 1      |
| Shape_PC1 | Iceland & Scotland          | 0.293 | 0 | 1      |
| Shape_PC2 | All 4                       | 0     | 0 | 1      |
| Shape_PC2 | Alaska & BC & Iceland       | 0.002 | 0 | 1      |
| Shape_PC2 | Alaska & BC & Scotland      | 0.003 | 0 | 1      |
| Shape_PC2 | Alaska & Iceland & Scotland | 0.002 | 0 | 1      |
| Shape_PC2 | BC & Iceland & Scotland     | 0.003 | 0 | 1      |
| Shape_PC2 | Alaska & BC                 | 0.33  | 1 | 0.2808 |
| Shape_PC2 | Alaska & Iceland            | 0.277 | 0 | 1      |
| Shape_PC2 | Alaska & Scotland           | 0.373 | 0 | 1      |
| Shape_PC2 | BC & Iceland                | 0.236 | 1 | 0.2114 |
| Shape_PC2 | BC & Scotland               | 0.304 | 0 | 1      |
| Shape_PC2 | Iceland & Scotland          | 0.299 | 1 | 0.2635 |
| Shape_PC3 | All 4                       | 0     | 0 | 1      |
| Shape_PC3 | Alaska & BC & Iceland       | 0.002 | 0 | 1      |
| Shape_PC3 | Alaska & BC & Scotland      | 0.001 | 0 | 1      |
| Shape_PC3 | Alaska & Iceland & Scotland | 0.001 | 0 | 1      |
| Shape_PC3 | BC & Iceland & Scotland     | 0.001 | 0 | 1      |
| Shape_PC3 | Alaska & BC                 | 0.284 | 1 | 0.2498 |
| Shape_PC3 | Alaska & Iceland            | 0.216 | 0 | 1      |
| Shape_PC3 | Alaska & Scotland           | 0.144 | 0 | 1      |
| Shape_PC3 | BC & Iceland                | 0.223 | 1 | 0.2023 |
| Shape_PC3 | BC & Scotland               | 0.137 | 0 | 1      |
| Shape_PC3 | Iceland & Scotland          | 0.132 | 0 | 1      |
| DS1       | All 4                       | 0     | 0 | 1      |
| DS1       | Alaska & BC & Iceland       | 0.004 | 0 | 1      |
| DS1       | Alaska & BC & Scotland      | 0.003 | 0 | 1      |
| DS1       | Alaska & Iceland & Scotland | 0.001 | 0 | 1      |
| DS1       | BC & Iceland & Scotland     | 0.002 | 0 | 1      |
| DS1       | Alaska & BC                 | 0.947 | 0 | 1      |
| DS1       | Alaska & Iceland            | 0.2   | 0 | 1      |
| DS1       | Alaska & Scotland           | 0.168 | 1 | 0.1551 |
| DS1       | BC & Iceland                | 0.519 | 1 | 0.4112 |

|     |                             |       |   |          |
|-----|-----------------------------|-------|---|----------|
| DS1 | BC & Scotland               | 0.432 | 1 | 0.3517   |
| DS1 | Iceland & Scotland          | 0.107 | 1 | 0.1011   |
| DS2 | All 4                       | 0     | 0 | 1        |
| DS2 | Alaska & BC & Iceland       | 0.002 | 0 | 1        |
| DS2 | Alaska & BC & Scotland      | 0.003 | 0 | 1        |
| DS2 | Alaska & Iceland & Scotland | 0     | 0 | 1        |
| DS2 | BC & Iceland & Scotland     | 0.003 | 0 | 1        |
| DS2 | Alaska & BC                 | 0.659 | 1 | 0.4845   |
| DS2 | Alaska & Iceland            | 0.122 | 0 | 1        |
| DS2 | Alaska & Scotland           | 0.157 | 1 | 0.1451   |
| DS2 | BC & Iceland                | 0.486 | 2 | 0.0857   |
| DS2 | BC & Scotland               | 0.629 | 0 | 1        |
| DS2 | Iceland & Scotland          | 0.131 | 3 | 4.00E-04 |
| PS  | All 4                       | 0     | 0 | 1        |
| PS  | Alaska & BC & Iceland       | 0.01  | 0 | 1        |
| PS  | Alaska & BC & Scotland      | 0.007 | 0 | 1        |
| PS  | Alaska & Iceland & Scotland | 0.002 | 0 | 1        |
| PS  | BC & Iceland & Scotland     | 0.007 | 0 | 1        |
| PS  | Alaska & BC                 | 1.347 | 4 | 0.0444   |
| PS  | Alaska & Iceland            | 0.455 | 1 | 0.3649   |
| PS  | Alaska & Scotland           | 0.323 | 1 | 0.275    |
| PS  | BC & Iceland                | 1.061 | 2 | 0.2845   |
| PS  | BC & Scotland               | 0.746 | 3 | 0.0392   |
| PS  | Iceland & Scotland          | 0.289 | 0 | 1        |
| LP  | All 4                       | 0     | 0 | 1        |
| LP  | Alaska & BC & Iceland       | 0.009 | 0 | 1        |
| LP  | Alaska & BC & Scotland      | 0.008 | 0 | 1        |
| LP  | Alaska & Iceland & Scotland | 0.003 | 0 | 1        |
| LP  | BC & Iceland & Scotland     | 0.003 | 1 | 0.003    |
| LP  | Alaska & BC                 | 1.736 | 2 | 0.5242   |
| LP  | Alaska & Iceland            | 0.426 | 4 | 8.00E-04 |
| LP  | Alaska & Scotland           | 0.389 | 2 | 0.0553   |
| LP  | BC & Iceland                | 0.777 | 0 | 1        |
| LP  | BC & Scotland               | 0.686 | 1 | 0.5057   |
| LP  | Iceland & Scotland          | 0.192 | 0 | 1        |
| HP  | All 4                       | 0     | 0 | 1        |
| HP  | Alaska & BC & Iceland       | 0.007 | 0 | 1        |
| HP  | Alaska & BC & Scotland      | 0.006 | 0 | 1        |
| HP  | Alaska & Iceland & Scotland | 0.003 | 0 | 1        |
| HP  | BC & Iceland & Scotland     | 0.004 | 0 | 1        |
| HP  | Alaska & BC                 | 0.889 | 1 | 0.5904   |

|              |                             |       |   |          |
|--------------|-----------------------------|-------|---|----------|
| HP           | Alaska & Iceland            | 0.458 | 0 | 1        |
| HP           | Alaska & Scotland           | 0.434 | 0 | 1        |
| HP           | BC & Iceland                | 0.629 | 1 | 0.4685   |
| HP           | BC & Scotland               | 0.625 | 0 | 1        |
| HP           | Iceland & Scotland          | 0.369 | 1 | 0.3091   |
| BAP          | All 4                       | 0     | 0 | 1        |
| BAP          | Alaska & BC & Iceland       | 0.002 | 0 | 1        |
| BAP          | Alaska & BC & Scotland      | 0.003 | 0 | 1        |
| BAP          | Alaska & Iceland & Scotland | 0.001 | 0 | 1        |
| BAP          | BC & Iceland & Scotland     | 0.002 | 0 | 1        |
| BAP          | Alaska & BC                 | 0.489 | 0 | 1        |
| BAP          | Alaska & Iceland            | 0.315 | 0 | 1        |
| BAP          | Alaska & Scotland           | 0.295 | 0 | 1        |
| BAP          | BC & Iceland                | 0.272 | 0 | 1        |
| BAP          | BC & Scotland               | 0.247 | 0 | 1        |
| BAP          | Iceland & Scotland          | 0.185 | 0 | 1        |
| Plate_N      | All 4                       | 0     | 0 | 1        |
| Plate_N      | Alaska & BC & Iceland       | 0.01  | 0 | 1        |
| Plate_N      | Alaska & BC & Scotland      | 0.007 | 0 | 1        |
| Plate_N      | Alaska & Iceland & Scotland | 0.003 | 0 | 1        |
| Plate_N      | BC & Iceland & Scotland     | 0.005 | 0 | 1        |
| Plate_N      | Alaska & BC                 | 1.332 | 8 | 1.00E-04 |
| Plate_N      | Alaska & Iceland            | 0.393 | 0 | 1        |
| Plate_N      | Alaska & Scotland           | 0.397 | 0 | 1        |
| Plate_N      | BC & Iceland                | 0.736 | 2 | 0.1689   |
| Plate_N      | BC & Scotland               | 0.719 | 0 | 1        |
| Plate_N      | Iceland & Scotland          | 0.248 | 1 | 0.2199   |
| Gill_Raker_L | All 4                       | 0     | 0 | 1        |
| Gill_Raker_L | Alaska & BC & Iceland       | 0.003 | 0 | 1        |
| Gill_Raker_L | Alaska & BC & Scotland      | 0.002 | 0 | 1        |
| Gill_Raker_L | Alaska & Iceland & Scotland | 0.001 | 0 | 1        |
| Gill_Raker_L | BC & Iceland & Scotland     | 0.002 | 0 | 1        |
| Gill_Raker_L | Alaska & BC                 | 0.538 | 1 | 0.4172   |
| Gill_Raker_L | Alaska & Iceland            | 0.304 | 1 | 0.2643   |
| Gill_Raker_L | Alaska & Scotland           | 0.193 | 0 | 1        |
| Gill_Raker_L | BC & Iceland                | 0.336 | 0 | 1        |
| Gill_Raker_L | BC & Scotland               | 0.226 | 1 | 0.2036   |
| Gill_Raker_L | Iceland & Scotland          | 0.149 | 0 | 1        |
| Gill_Raker_N | All 4                       | 0     | 0 | 1        |
| Gill_Raker_N | Alaska & BC & Iceland       | 0.004 | 0 | 1        |
| Gill_Raker_N | Alaska & BC & Scotland      | 0.004 | 0 | 1        |

|              |                             |       |   |        |
|--------------|-----------------------------|-------|---|--------|
| Gill_Raker_N | Alaska & Iceland & Scotland | 0.001 | 0 | 1      |
| Gill_Raker_N | BC & Iceland & Scotland     | 0.007 | 0 | 1      |
| Gill_Raker_N | Alaska & BC                 | 0.567 | 7 | 0      |
| Gill_Raker_N | Alaska & Iceland            | 0.172 | 0 | 1      |
| Gill_Raker_N | Alaska & Scotland           | 0.171 | 0 | 1      |
| Gill_Raker_N | BC & Iceland                | 0.853 | 0 | 1      |
| Gill_Raker_N | BC & Scotland               | 0.827 | 1 | 0.5736 |
| Gill_Raker_N | Iceland & Scotland          | 0.295 | 1 | 0.2553 |

---

**Supplementary Table 11.** 50kb Marine - Freshwater (MxF) outlier regions. Parallel windows are grouped and windows are ordered by extent of parallelism. Previous evidence of marine x freshwater association is also highlighted.

| Window ID                 | Radiations                       | Previous Marine Freshwater evidence?                                                                                                                                                                                                                                                                                                                                                     |
|---------------------------|----------------------------------|------------------------------------------------------------------------------------------------------------------------------------------------------------------------------------------------------------------------------------------------------------------------------------------------------------------------------------------------------------------------------------------|
| groupXX:8900000-9000000   | Alaska & BC & Iceland & Scotland | Albert et al. 2008 Evolution/Arnegard et al. 2014 Nature/Erickson et al. 2016 Evolution/Liu et al. 2014 G3/Miller et al. 2014 Genetics/Rogers et al. 2012 Evolution/Glazer et al. 2014 EvoDevo/Glazer et al. 2015 G3                                                                                                                                                                     |
| groupI:21600000-21700000  | Alaska & Iceland & Scotland      | Jones et al 2012 Nature/Hohenlohe et al 2010 PLoS Genet/Conte et al. 2015 Genetics/Liu et al. 2014 G3/Rogers et al. 2012 Evolution/Erickson et al. 2016 Evolution/Peichel et al. 2001 Nature/Glazer et al. 2015 G3                                                                                                                                                                       |
| groupI:21700000-21800000  | Alaska & Iceland & Scotland      | Jones et al 2012 Nature/Hohenlohe et al 2010 PLoS Genet/Conte et al. 2015 Genetics/Liu et al. 2014 G3/Rogers et al. 2012 Evolution/Erickson et al. 2016 Evolution/Peichel et al. 2001 Nature/Glazer et al. 2015 G3                                                                                                                                                                       |
| groupIV:12800000-12900000 | Alaska & Iceland & Scotland      | Jones et al 2012 Nature/Hohenlohe et al 2010 PLoS Genet/Arnegard et al. 2014 Nature/Conte et al. 2015 Genetics/Erickson et al. 2016 Evolution/Malek et al. 2012 Mol Ecol/Miller et al. 2014 Genetics/Rogers et al. 2012 Evolution/Berner et al. 2014 Evolution/Glazer et al. 2015 G3/Liu et al. 2014 G3/Wark et al. 2012 G3/Erickson et al. 2014 Proc R Soc B/Glazer et al. 2014 EvoDevo |
| groupI:8600000-8700000    | Alaska & Iceland                 | Arnegard et al. 2014 Nature/Conte et al. 2015 Genetics/Erickson et al. 2016 Evolution/Liu et al. 2014 G3/Miller et al. 2014 Genetics/Rogers et al. 2012 Evolution/Peichel et al. 2001 Nature/Glazer et al. 2015 G3                                                                                                                                                                       |
| groupI:21800000-21900000  | Alaska & Scotland                | Jones et al 2012 Nature/Hohenlohe et al 2010 PLoS Genet/Conte et al. 2015 Genetics/Liu et al. 2014 G3/Rogers et al. 2012 Evolution/Erickson et al. 2016 Evolution/Peichel et al. 2001 Nature/Glazer et al. 2015 G3                                                                                                                                                                       |
| groupIV:19800000-19900000 | Alaska & Iceland                 | Jones et al 2012 Nature/Hohenlohe et al 2010 PLoS Genet/Albert et al. 2008 Evolution/Arnegard et al. 2014 Nature/Conte et al. 2015 Genetics/Erickson et al. 2016 Evolution/Miller et al. 2014 Genetics/Rogers et al. 2012 Evolution/Liu et al. 2014 G3/Erickson et al. 2014 Proc R Soc B/Glazer et al. 2014 EvoDevo/Glazer et al. 2015 G3                                                |
| groupVIII:9300000-9400000 | Alaska & BC                      | Arnegard et al. 2014 Nature/Conte et al. 2015 Genetics/Miller et al. 2014 Genetics/Erickson et al. 2016 Evolution                                                                                                                                                                                                                                                                        |
| groupXI:5400000-5500000   | Alaska & BC                      | Hohenlohe et al 2010 PLoS Genet/Conte et al. 2015 Genetics/Arnegard et al. 2014 Nature/Berner et al. 2014 Evolution/Liu et al. 2014 G3/Miller et al. 2014 Genetics                                                                                                                                                                                                                       |
| groupXI:5500000-5600000   | Alaska & BC                      | Hohenlohe et al 2010 PLoS Genet/Conte et al. 2015 Genetics/Rogers et al. 2012 Evolution/Arnegard et al. 2014 Nature/Berner et al. 2014 Evolution/Liu et al. 2014 G3/Miller et al. 2014 Genetics                                                                                                                                                                                          |
| groupXI:5700000-5800000   | Alaska & BC                      | Hohenlohe et al 2010 PLoS Genet/Conte et al. 2015 Genetics/Rogers et al. 2012 Evolution/Arnegard et al. 2014 Nature/Berner et al. 2014 Evolution/Liu et al. 2014 G3/Miller et al. 2014 Genetics                                                                                                                                                                                          |
| scaffold-37:0-100000      | Alaska & BC                      | No                                                                                                                                                                                                                                                                                                                                                                                       |
| scaffold-37:100000-200000 | Alaska & BC                      | No                                                                                                                                                                                                                                                                                                                                                                                       |
| scaffold-37:200000-300000 | Alaska & BC                      | No                                                                                                                                                                                                                                                                                                                                                                                       |
| groupI:21500000-21600000  | Iceland & Scotland               | Jones et al 2012 Nature/Hohenlohe et al 2010 PLoS Genet/Conte et al. 2015 Genetics/Liu et al. 2014 G3/Rogers et al. 2012 Evolution/Erickson et al. 2016 Evolution/Peichel et al. 2001 Nature/Glazer et al. 2015 G3                                                                                                                                                                       |
| groupIV:23900000-24000000 | Iceland & Scotland               | Jones et al 2012 Nature/Hohenlohe et al 2010 PLoS Genet/Albert et al. 2008 Evolution/Arnegard et al. 2014 Nature/Conte et al. 2015 Genetics/Erickson et al. 2016 Evolution/Malek et al. 2012 Mol Ecol/Miller et al. 2014 Genetics/Rogers et al. 2012 Evolution/Glazer et al. 2014 EvoDevo/Glazer et al. 2015 G3                                                                          |
| groupXV:7100000-7200000   | Iceland & Scotland               | Albert et al. 2008 Evolution/Liu et al. 2014 G3/Miller et al. 2014 Genetics                                                                                                                                                                                                                                                                                                              |
| groupXX:200000-300000     | Iceland & Scotland               | No                                                                                                                                                                                                                                                                                                                                                                                       |

|                             |                    |                                                                                                                                                                                                                                                                                                                                                                                            |
|-----------------------------|--------------------|--------------------------------------------------------------------------------------------------------------------------------------------------------------------------------------------------------------------------------------------------------------------------------------------------------------------------------------------------------------------------------------------|
| scaffold-47:1600000-1700000 | Iceland & Scotland | No                                                                                                                                                                                                                                                                                                                                                                                         |
| groupI:9300000-9400000      | Alaska             | Arnegard et al. 2014 Nature/Conte et al. 2015 Genetics/Erickson et al. 2016 Evolution/Liu et al. 2014 G3/Miller et al. 2014 Genetics/Rogers et al. 2012 Evolution/Peichel et al. 2001 Nature/Glazer et al. 2015 G3                                                                                                                                                                         |
| groupII:4500000-4600000     | Alaska             | Arnegard et al. 2014 Nature/Conte et al. 2015 Genetics/Rogers et al. 2012 Evolution/Miller et al. 2014 Genetics                                                                                                                                                                                                                                                                            |
| groupIV:10500000-10600000   | Alaska             | Albert et al. 2008 Evolution/Arnegard et al. 2014 Nature/Conte et al. 2015 Genetics/Malek et al. 2012 Mol Ecol/Miller et al. 2014 Genetics/Rogers et al. 2012 Evolution/Colosimo et al. 2004 PLoS Biol/Shapiro et al. 2004 Nature/Erickson et al. 2014 Proc R Soc B/Erickson et al. 2016 Evolution/Glazer et al. 2014 EvoDevo/Glazer et al. 2015 G3                                        |
| groupIV:11000000-11100000   | Alaska             | Albert et al. 2008 Evolution/Arnegard et al. 2014 Nature/Conte et al. 2015 Genetics/Malek et al. 2012 Mol Ecol/Miller et al. 2014 Genetics/Rogers et al. 2012 Evolution/Colosimo et al. 2004 PLoS Biol/Shapiro et al. 2004 Nature/Wark et al. 2012 G3/Erickson et al. 2014 Proc R Soc B/Erickson et al. 2016 Evolution/Glazer et al. 2014 EvoDevo/Glazer et al. 2015 G3                    |
| groupIV:11200000-11300000   | Alaska             | Albert et al. 2008 Evolution/Arnegard et al. 2014 Nature/Conte et al. 2015 Genetics/Erickson et al. 2016 Evolution/Malek et al. 2012 Mol Ecol/Miller et al. 2014 Genetics/Rogers et al. 2012 Evolution/Colosimo et al. 2004 PLoS Biol/Shapiro et al. 2004 Nature/Wark et al. 2012 G3/Erickson et al. 2014 Proc R Soc B/Glazer et al. 2014 EvoDevo/Glazer et al. 2015 G3                    |
| groupIV:11600000-11700000   | Alaska             | Albert et al. 2008 Evolution/Arnegard et al. 2014 Nature/Conte et al. 2015 Genetics/Erickson et al. 2016 Evolution/Malek et al. 2012 Mol Ecol/Miller et al. 2014 Genetics/Rogers et al. 2012 Evolution/Colosimo et al. 2004 PLoS Biol/Liu et al. 2014 G3/Shapiro et al. 2004 Nature/Wark et al. 2012 G3/Erickson et al. 2014 Proc R Soc B/Glazer et al. 2014 EvoDevo/Glazer et al. 2015 G3 |
| groupIV:12700000-12800000   | Alaska             | Hohenlohe et al 2010 PLoS Genet/Arnegard et al. 2014 Nature/Conte et al. 2015 Genetics/Erickson et al. 2016 Evolution/Malek et al. 2012 Mol Ecol/Miller et al. 2014 Genetics/Rogers et al. 2012 Evolution/Berner et al. 2014 Evolution/Glazer et al. 2015 G3/Liu et al. 2014 G3/Wark et al. 2012 G3/Erickson et al. 2014 Proc R Soc B/Glazer et al. 2014 EvoDevo                           |
| groupIV:12900000-13000000   | Alaska             | Hohenlohe et al 2010 PLoS Genet/Arnegard et al. 2014 Nature/Conte et al. 2015 Genetics/Erickson et al. 2016 Evolution/Malek et al. 2012 Mol Ecol/Miller et al. 2014 Genetics/Rogers et al. 2012 Evolution/Berner et al. 2014 Evolution/Glazer et al. 2015 G3/Liu et al. 2014 G3/Wark et al. 2012 G3/Erickson et al. 2014 Proc R Soc B/Glazer et al. 2014 EvoDevo                           |
| groupIV:13800000-13900000   | Alaska             | Arnegard et al. 2014 Nature/Conte et al. 2015 Genetics/Erickson et al. 2016 Evolution/Malek et al. 2012 Mol Ecol/Miller et al. 2014 Genetics/Rogers et al. 2012 Evolution/Liu et al. 2014 G3/Wark et al. 2012 G3/Erickson et al. 2014 Proc R Soc B/Glazer et al. 2014 EvoDevo/Glazer et al. 2015 G3                                                                                        |
| groupIV:16700000-16800000   | Alaska             | Arnegard et al. 2014 Nature/Conte et al. 2015 Genetics/Erickson et al. 2016 Evolution/Miller et al. 2014 Genetics/Rogers et al. 2012 Evolution/Liu et al. 2014 G3/Erickson et al. 2014 Proc R Soc B/Glazer et al. 2014 EvoDevo/Glazer et al. 2015 G3                                                                                                                                       |
| groupIV:18100000-18200000   | Alaska             | Albert et al. 2008 Evolution/Arnegard et al. 2014 Nature/Conte et al. 2015 Genetics/Erickson et al. 2016 Evolution/Miller et al. 2014 Genetics/Rogers et al. 2012 Evolution/Liu et al. 2014 G3/Erickson et al. 2014 Proc R Soc B/Glazer et al. 2014 EvoDevo/Glazer et al. 2015 G3                                                                                                          |
| groupIV:19200000-19300000   | Alaska             | Albert et al. 2008 Evolution/Arnegard et al. 2014 Nature/Conte et al. 2015 Genetics/Erickson et al. 2016 Evolution/Miller et al. 2014 Genetics/Rogers et al. 2012 Evolution/Liu et al. 2014 G3/Erickson et al. 2014 Proc R Soc B/Glazer et al. 2014 EvoDevo/Glazer et al. 2015 G3                                                                                                          |
| groupIV:19900000-20000000   | Alaska             | Jones et al 2012 Nature/Hohenlohe et al 2010 PLoS Genet/Albert et al. 2008 Evolution/Arnegard et al. 2014 Nature/Conte et al. 2015 Genetics/Erickson et al. 2016 Evolution/Miller et al. 2014 Genetics/Rogers et al. 2012 Evolution/Liu et al. 2014 G3/Erickson et al. 2014 Proc R Soc B/Glazer et al. 2014 EvoDevo/Glazer et al. 2015 G3                                                  |
| groupIV:20000000-20100000   | Alaska             | Hohenlohe et al 2010 PLoS Genet/Albert et al. 2008 Evolution/Arnegard et al. 2014 Nature/Conte et al. 2015 Genetics/Erickson et al. 2016 Evolution/Miller et al. 2014 Genetics/Rogers et al. 2012 Evolution/Colosimo et al. 2004 PLoS Biol/Liu et al. 2014 G3/Erickson et al. 2014 Proc R Soc B/Glazer et al. 2014 EvoDevo/Glazer et al. 2015 G3                                           |
| groupIV:23800000-23900000   | Alaska             | Hohenlohe et al 2010 PLoS Genet/Albert et al. 2008 Evolution/Arnegard et al. 2014 Nature/Conte et al. 2015 Genetics/Erickson et al. 2016 Evolution/Malek et al. 2012 Mol Ecol/Miller et al. 2014 Genetics/Rogers et al. 2012 Evolution/Glazer et al. 2014 EvoDevo/Glazer et al. 2015 G3                                                                                                    |
| groupIV:25100000-25200000   | Alaska             | Hohenlohe et al 2010 PLoS Genet/Albert et al. 2008 Evolution/Arnegard et al. 2014 Nature/Conte et al. 2015 Genetics/Erickson et al. 2016 Evolution/Malek et al. 2012 Mol Ecol/Miller et al. 2014 Genetics/Rogers et al. 2012 Evolution/Cleves et al. 2014 PNAS/Glazer et al. 2014 EvoDevo/Glazer et al. 2015 G3                                                                            |





|                             |        |                                                                                                                                                                                                                                            |
|-----------------------------|--------|--------------------------------------------------------------------------------------------------------------------------------------------------------------------------------------------------------------------------------------------|
| groupVII:17100000-17200000  | Alaska | Hohenlohe et al 2010 PLoS Genet/Arnegard et al. 2014 Nature/Conte et al. 2015 Genetics/Miller et al. 2014 Genetics/Erickson et al. 2016 Evolution/Glazer et al. 2015 G3/Liu et al. 2014 G3/Cleves et al. 2014 PNAS                         |
| groupVII:17700000-17800000  | Alaska | Hohenlohe et al 2010 PLoS Genet/Arnegard et al. 2014 Nature/Conte et al. 2015 Genetics/Miller et al. 2014 Genetics/Erickson et al. 2016 Evolution/Glazer et al. 2015 G3/Liu et al. 2014 G3/Cleves et al. 2014 PNAS                         |
| groupVII:17900000-18000000  | Alaska | Jones et al 2012 Nature/Hohenlohe et al 2010 PLoS Genet/Arnegard et al. 2014 Nature/Conte et al. 2015 Genetics/Miller et al. 2014 Genetics/Erickson et al. 2016 Evolution/Glazer et al. 2015 G3/Liu et al. 2014 G3/Cleves et al. 2014 PNAS |
| groupVII:18900000-19000000  | Alaska | Arnegard et al. 2014 Nature/Conte et al. 2015 Genetics/Malek et al. 2012 Mol Ecol/Miller et al. 2014 Genetics/Erickson et al. 2016 Evolution/Glazer et al. 2015 G3/Liu et al. 2014 G3                                                      |
| groupVII:19500000-19600000  | Alaska | Arnegard et al. 2014 Nature/Conte et al. 2015 Genetics/Malek et al. 2012 Mol Ecol/Miller et al. 2014 Genetics/Erickson et al. 2016 Evolution/Glazer et al. 2015 G3/Liu et al. 2014 G3                                                      |
| groupVII:19800000-19900000  | Alaska | Arnegard et al. 2014 Nature/Conte et al. 2015 Genetics/Malek et al. 2012 Mol Ecol/Miller et al. 2014 Genetics/Erickson et al. 2016 Evolution/Glazer et al. 2015 G3/Liu et al. 2014 G3                                                      |
| groupVII:20000000-20100000  | Alaska | Arnegard et al. 2014 Nature/Conte et al. 2015 Genetics/Malek et al. 2012 Mol Ecol/Miller et al. 2014 Genetics/Erickson et al. 2016 Evolution/Glazer et al. 2015 G3/Liu et al. 2014 G3                                                      |
| groupVIII:7200000-7300000   | Alaska | Arnegard et al. 2014 Nature/Conte et al. 2015 Genetics/Miller et al. 2014 Genetics/Erickson et al. 2016 Evolution                                                                                                                          |
| groupVIII:8300000-8400000   | Alaska | Hohenlohe et al 2010 PLoS Genet/Arnegard et al. 2014 Nature/Conte et al. 2015 Genetics/Miller et al. 2014 Genetics/Erickson et al. 2016 Evolution                                                                                          |
| groupVIII:8400000-8500000   | Alaska | Hohenlohe et al 2010 PLoS Genet/Arnegard et al. 2014 Nature/Conte et al. 2015 Genetics/Miller et al. 2014 Genetics/Erickson et al. 2016 Evolution                                                                                          |
| groupVIII:9600000-9700000   | Alaska | Arnegard et al. 2014 Nature/Conte et al. 2015 Genetics/Miller et al. 2014 Genetics/Erickson et al. 2016 Evolution                                                                                                                          |
| groupXI:5600000-5700000     | Alaska | Hohenlohe et al 2010 PLoS Genet/Conte et al. 2015 Genetics/Rogers et al. 2012 Evolution/Arnegard et al. 2014 Nature/Berner et al. 2014 Evolution/Liu et al. 2014 G3/Miller et al. 2014 Genetics                                            |
| groupXI:6300000-6400000     | Alaska | Conte et al. 2015 Genetics/Rogers et al. 2012 Evolution/Arnegard et al. 2014 Nature/Berner et al. 2014 Evolution/Liu et al. 2014 G3/Miller et al. 2014 Genetics                                                                            |
| groupXI:6500000-6600000     | Alaska | Conte et al. 2015 Genetics/Rogers et al. 2012 Evolution/Arnegard et al. 2014 Nature/Berner et al. 2014 Evolution/Liu et al. 2014 G3/Miller et al. 2014 Genetics                                                                            |
| groupXI:8900000-9000000     | Alaska | Conte et al. 2015 Genetics/Rogers et al. 2012 Evolution/Arnegard et al. 2014 Nature/Liu et al. 2014 G3/Miller et al. 2014 Genetics/Glazer et al. 2015 G3                                                                                   |
| groupXI:9100000-9200000     | Alaska | Conte et al. 2015 Genetics/Rogers et al. 2012 Evolution/Arnegard et al. 2014 Nature/Berner et al. 2014 Evolution/Liu et al. 2014 G3/Miller et al. 2014 Genetics/Peichel et al. 2001 Nature/Glazer et al. 2015 G3                           |
| groupXI:9500000-9600000     | Alaska | Conte et al. 2015 Genetics/Rogers et al. 2012 Evolution/Arnegard et al. 2014 Nature/Berner et al. 2014 Evolution/Liu et al. 2014 G3/Miller et al. 2014 Genetics/Peichel et al. 2001 Nature/Glazer et al. 2015 G3                           |
| groupXII:12300000-12400000  | Alaska | Albert et al. 2008 Evolution/Conte et al. 2015 Genetics/Liu et al. 2014 G3/Rogers et al. 2012 Evolution/Miller et al. 2014 Genetics                                                                                                        |
| groupXII:12400000-12500000  | Alaska | Albert et al. 2008 Evolution/Conte et al. 2015 Genetics/Liu et al. 2014 G3/Rogers et al. 2012 Evolution/Miller et al. 2014 Genetics                                                                                                        |
| groupXII:14800000-14900000  | Alaska | Conte et al. 2015 Genetics/Liu et al. 2014 G3/Rogers et al. 2012 Evolution/Miller et al. 2014 Genetics                                                                                                                                     |
| groupXIII:11700000-11800000 | Alaska | Arnegard et al. 2014 Nature/Conte et al. 2015 Genetics/Liu et al. 2014 G3/Miller et al. 2014 Genetics/Peichel et al. 2001 Nature                                                                                                           |
| groupXIII:11800000-11900000 | Alaska | Arnegard et al. 2014 Nature/Conte et al. 2015 Genetics/Liu et al. 2014 G3/Miller et al. 2014 Genetics/Peichel et al. 2001 Nature                                                                                                           |
| groupXIII:12900000-13000000 | Alaska | Arnegard et al. 2014 Nature/Conte et al. 2015 Genetics/Liu et al. 2014 G3/Miller et al. 2014 Genetics/Peichel et al. 2001 Nature                                                                                                           |
| groupXX:6200000-6300000     | Alaska | Arnegard et al. 2014 Nature/Erickson et al. 2016 Evolution/Miller et al. 2014 Genetics/Rogers et al. 2012 Evolution/Glazer et al. 2014 EvoDevo/Glazer et al. 2015 G3                                                                       |

|                             |         |                                                                                                                                                                                                                                                               |
|-----------------------------|---------|---------------------------------------------------------------------------------------------------------------------------------------------------------------------------------------------------------------------------------------------------------------|
| groupXX:8100000-8200000     | Alaska  | Albert et al. 2008 Evolution/Arnegard et al. 2014 Nature/Erickson et al. 2016 Evolution/Liu et al. 2014 G3/Miller et al. 2014 Genetics/Rogers et al. 2012 Evolution/Glazer et al. 2014 EvoDevo/Glazer et al. 2015 G3                                          |
| groupXX:9100000-9200000     | Alaska  | Albert et al. 2008 Evolution/Arnegard et al. 2014 Nature/Erickson et al. 2016 Evolution/Liu et al. 2014 G3/Miller et al. 2014 Genetics/Rogers et al. 2012 Evolution/Glazer et al. 2014 EvoDevo/Glazer et al. 2015 G3                                          |
| groupXX:9900000-10000000    | Alaska  | Arnegard et al. 2014 Nature/Erickson et al. 2016 Evolution/Liu et al. 2014 G3/Miller et al. 2014 Genetics/Rogers et al. 2012 Evolution/Glazer et al. 2014 EvoDevo/Glazer et al. 2015 G3                                                                       |
| groupXX:12300000-12400000   | Alaska  | Arnegard et al. 2014 Nature/Erickson et al. 2016 Evolution/Liu et al. 2014 G3/Miller et al. 2014 Genetics/Rogers et al. 2012 Evolution/Glazer et al. 2014 EvoDevo/Glazer et al. 2015 G3                                                                       |
| groupXX:12500000-12600000   | Alaska  | Arnegard et al. 2014 Nature/Erickson et al. 2016 Evolution/Liu et al. 2014 G3/Miller et al. 2014 Genetics/Rogers et al. 2012 Evolution/Glazer et al. 2014 EvoDevo/Glazer et al. 2015 G3                                                                       |
| groupXXI:2800000-2900000    | Alaska  | Erickson et al. 2016 Evolution/Cleves et al. 2014 PNAS/Erickson et al. 2014 Proc R Soc B/Miller et al. 2014 Genetics                                                                                                                                          |
| groupXXI:5500000-5600000    | Alaska  | Hohenlohe et al 2010 PLoS Genet/Albert et al. 2008 Evolution/Erickson et al. 2016 Evolution/Liu et al. 2014 G3/Colosimo et al. 2004 PLoS Biol/Wark et al. 2012 G3/Ellis et al. 2015 Development/Erickson et al. 2014 Proc R Soc B/Miller et al. 2014 Genetics |
| scaffold-173:100000-200000  | Alaska  | No                                                                                                                                                                                                                                                            |
| scaffold-47:100000-200000   | Alaska  | No                                                                                                                                                                                                                                                            |
| groupII:6100000-6200000     | BC      | Arnegard et al. 2014 Nature/Conte et al. 2015 Genetics/Miller et al. 2014 Genetics/Shapiro et al. 2004 Nature                                                                                                                                                 |
| groupIX:9900000-10000000    | BC      | Arnegard et al. 2014 Nature/Rogers et al. 2012 Evolution/Berner et al. 2014 Evolution/Miller et al. 2014 Genetics/Ellis et al. 2015 Development                                                                                                               |
| groupV:3800000-3900000      | BC      | Erickson et al. 2016 Evolution/Miller et al. 2014 Genetics                                                                                                                                                                                                    |
| groupVII:21300000-21400000  | BC      | Arnegard et al. 2014 Nature/Conte et al. 2015 Genetics/Miller et al. 2014 Genetics/Erickson et al. 2016 Evolution/Glazer et al. 2015 G3/Liu et al. 2014 G3                                                                                                    |
| groupXI:5300000-5400000     | BC      | Conte et al. 2015 Genetics/Arnegard et al. 2014 Nature/Berner et al. 2014 Evolution/Liu et al. 2014 G3/Miller et al. 2014 Genetics                                                                                                                            |
| groupXI:5800000-5900000     | BC      | Hohenlohe et al 2010 PLoS Genet/Conte et al. 2015 Genetics/Rogers et al. 2012 Evolution/Arnegard et al. 2014 Nature/Berner et al. 2014 Evolution/Liu et al. 2014 G3/Miller et al. 2014 Genetics                                                               |
| groupXI:7700000-7800000     | BC      | Conte et al. 2015 Genetics/Rogers et al. 2012 Evolution/Arnegard et al. 2014 Nature/Liu et al. 2014 G3/Miller et al. 2014 Genetics/Glazer et al. 2015 G3                                                                                                      |
| groupXIII:10600000-10700000 | BC      | Arnegard et al. 2014 Nature/Conte et al. 2015 Genetics/Liu et al. 2014 G3/Miller et al. 2014 Genetics/Peichel et al. 2001 Nature                                                                                                                              |
| groupXIII:13200000-13300000 | BC      | Arnegard et al. 2014 Nature/Conte et al. 2015 Genetics/Miller et al. 2014 Genetics/Peichel et al. 2001 Nature                                                                                                                                                 |
| groupXVI:16900000-17000000  | BC      | Albert et al. 2008 Evolution/Arnegard et al. 2014 Nature/Conte et al. 2015 Genetics/Ellis et al. 2015 Development                                                                                                                                             |
| groupXX:7000000-7100000     | BC      | Arnegard et al. 2014 Nature/Erickson et al. 2016 Evolution/Miller et al. 2014 Genetics/Rogers et al. 2012 Evolution/Glazer et al. 2014 EvoDevo/Glazer et al. 2015 G3                                                                                          |
| scaffold-37:1500000-1600000 | BC      | No                                                                                                                                                                                                                                                            |
| scaffold-56:800000-900000   | BC      | No                                                                                                                                                                                                                                                            |
| groupI:24400000-24500000    | Iceland | Conte et al. 2015 Genetics/Liu et al. 2014 G3/Rogers et al. 2012 Evolution/Erickson et al. 2016 Evolution/Miller et al. 2014 Genetics                                                                                                                         |
| groupIV:22600000-22700000   | Iceland | Arnegard et al. 2014 Nature/Conte et al. 2015 Genetics/Erickson et al. 2016 Evolution/Miller et al. 2014 Genetics/Rogers et al. 2012 Evolution/Liu et al. 2014 G3/Glazer et al. 2014 EvoDevo/Glazer et al. 2015 G3                                            |
| groupIV:26000000-26100000   | Iceland | Arnegard et al. 2014 Nature/Conte et al. 2015 Genetics/Erickson et al. 2016 Evolution/Miller et al. 2014 Genetics/Rogers et al. 2012 Evolution/Cleves et al. 2014 PNAS/Glazer et al. 2014 EvoDevo/Glazer et al. 2015 G3                                       |

|                              |          |                                                                                                                                                                                                                                                                                                                                                                         |
|------------------------------|----------|-------------------------------------------------------------------------------------------------------------------------------------------------------------------------------------------------------------------------------------------------------------------------------------------------------------------------------------------------------------------------|
| groupIX:19800000-19900000    | Iceland  | No                                                                                                                                                                                                                                                                                                                                                                      |
| groupXIV:11200000-11300000   | Iceland  | Arnegard et al. 2014 Nature/Conte et al. 2015 Genetics/Miller et al. 2014 Genetics                                                                                                                                                                                                                                                                                      |
| groupXVI:16400000-16500000   | Iceland  | Arnegard et al. 2014 Nature/Conte et al. 2015 Genetics/Ellis et al. 2015 Development                                                                                                                                                                                                                                                                                    |
| groupXVIII:11700000-11800000 | Iceland  | Albert et al. 2008 Evolution/Arnegard et al. 2014 Nature/Miller et al. 2014 Genetics/Ellis et al. 2015 Development                                                                                                                                                                                                                                                      |
| groupXXI:5700000-5800000     | Iceland  | Hohenlohe et al 2010 PLoS Genet/Erickson et al. 2016 Evolution/Liu et al. 2014 G3/Ellis et al. 2015 Development/Erickson et al. 2014 Proc R Soc B/Miller et al. 2014 Genetics                                                                                                                                                                                           |
| groupXXI:5800000-5900000     | Iceland  | Hohenlohe et al 2010 PLoS Genet/Erickson et al. 2016 Evolution/Liu et al. 2014 G3/Ellis et al. 2015 Development/Erickson et al. 2014 Proc R Soc B/Miller et al. 2014 Genetics                                                                                                                                                                                           |
| groupXXI:6200000-6300000     | Iceland  | Hohenlohe et al 2010 PLoS Genet/Erickson et al. 2016 Evolution/Liu et al. 2014 G3/Ellis et al. 2015 Development/Erickson et al. 2014 Proc R Soc B/Miller et al. 2014 Genetics                                                                                                                                                                                           |
| groupXXI:6500000-6600000     | Iceland  | Hohenlohe et al 2010 PLoS Genet/Erickson et al. 2016 Evolution/Liu et al. 2014 G3/Ellis et al. 2015 Development/Erickson et al. 2014 Proc R Soc B/Miller et al. 2014 Genetics                                                                                                                                                                                           |
| groupXXI:6700000-6800000     | Iceland  | Hohenlohe et al 2010 PLoS Genet/Erickson et al. 2016 Evolution/Liu et al. 2014 G3/Ellis et al. 2015 Development/Erickson et al. 2014 Proc R Soc B/Miller et al. 2014 Genetics                                                                                                                                                                                           |
| groupXXI:6800000-6900000     | Iceland  | Hohenlohe et al 2010 PLoS Genet/Erickson et al. 2016 Evolution/Liu et al. 2014 G3/Ellis et al. 2015 Development/Erickson et al. 2014 Proc R Soc B/Miller et al. 2014 Genetics                                                                                                                                                                                           |
| groupXXI:7000000-7100000     | Iceland  | Hohenlohe et al 2010 PLoS Genet/Erickson et al. 2016 Evolution/Liu et al. 2014 G3/Ellis et al. 2015 Development/Erickson et al. 2014 Proc R Soc B/Miller et al. 2014 Genetics                                                                                                                                                                                           |
| groupXXI:7200000-7300000     | Iceland  | Hohenlohe et al 2010 PLoS Genet/Erickson et al. 2016 Evolution/Liu et al. 2014 G3/Ellis et al. 2015 Development/Erickson et al. 2014 Proc R Soc B/Miller et al. 2014 Genetics                                                                                                                                                                                           |
| scaffold-27:800000-900000    | Iceland  | No                                                                                                                                                                                                                                                                                                                                                                      |
| groupIII:100000-200000       | Scotland | Conte et al. 2015 Genetics                                                                                                                                                                                                                                                                                                                                              |
| groupIV:10900000-11000000    | Scotland | Albert et al. 2008 Evolution/Arnegard et al. 2014 Nature/Conte et al. 2015 Genetics/Malek et al. 2012 Mol Ecol/Miller et al. 2014 Genetics/Rogers et al. 2012 Evolution/Colosimo et al. 2004 PLoS Biol/Shapiro et al. 2004 Nature/Wark et al. 2012 G3/Erickson et al. 2014 Proc R Soc B/Erickson et al. 2016 Evolution/Glazer et al. 2014 EvoDevo/Glazer et al. 2015 G3 |
| groupIV:22700000-22800000    | Scotland | Arnegard et al. 2014 Nature/Conte et al. 2015 Genetics/Erickson et al. 2016 Evolution/Miller et al. 2014 Genetics/Rogers et al. 2012 Evolution/Glazer et al. 2014 EvoDevo/Glazer et al. 2015 G3                                                                                                                                                                         |
| groupIX:15700000-15800000    | Scotland | Arnegard et al. 2014 Nature/Rogers et al. 2012 Evolution/Ellis et al. 2015 Development                                                                                                                                                                                                                                                                                  |
| groupVII:19200000-19300000   | Scotland | Arnegard et al. 2014 Nature/Conte et al. 2015 Genetics/Malek et al. 2012 Mol Ecol/Miller et al. 2014 Genetics/Erickson et al. 2016 Evolution/Glazer et al. 2015 G3/Liu et al. 2014 G3                                                                                                                                                                                   |
| groupX:10200000-10300000     | Scotland | Liu et al. 2014 G3/Colosimo et al. 2004 PLoS Biol/Miller et al. 2014 Genetics/Erickson et al. 2016 Evolution/Glazer et al. 2015 G3/Rogers et al. 2012 Evolution                                                                                                                                                                                                         |
| groupXIV:8800000-8900000     | Scotland | Arnegard et al. 2014 Nature/Conte et al. 2015 Genetics/Miller et al. 2014 Genetics/Erickson et al. 2016 Evolution                                                                                                                                                                                                                                                       |
| groupXX:100000-200000        | Scotland | No                                                                                                                                                                                                                                                                                                                                                                      |
| groupXX:3600000-3700000      | Scotland | Arnegard et al. 2014 Nature/Miller et al. 2014 Genetics/Colosimo et al. 2004 PLoS Biol/Rogers et al. 2012 Evolution/Cleves et al. 2014 PNAS/Glazer et al. 2015 G3                                                                                                                                                                                                       |
| groupXXI:7900000-8000000     | Scotland | Erickson et al. 2016 Evolution/Liu et al. 2014 G3/Ellis et al. 2015 Development/Erickson et al. 2014 Proc R Soc B/Miller et al. 2014 Genetics                                                                                                                                                                                                                           |
| scaffold-108:0-100000        | Scotland | No                                                                                                                                                                                                                                                                                                                                                                      |

|                             |                                  |                                                                                                                                                                                                                                                                                                                                                                                          |
|-----------------------------|----------------------------------|------------------------------------------------------------------------------------------------------------------------------------------------------------------------------------------------------------------------------------------------------------------------------------------------------------------------------------------------------------------------------------------|
| groupXX:8900000-9000000     | Alaska & BC & Iceland & Scotland | Albert et al. 2008 Evolution/Arnegard et al. 2014 Nature/Erickson et al. 2016 Evolution/Liu et al. 2014 G3/Miller et al. 2014 Genetics/Rogers et al. 2012 Evolution/Glazer et al. 2014 EvoDevo/Glazer et al. 2015 G3                                                                                                                                                                     |
| groupI:21600000-21700000    | Alaska & Iceland & Scotland      | Jones et al 2012 Nature/Hohenlohe et al 2010 PLoS Genet/Conte et al. 2015 Genetics/Liu et al. 2014 G3/Rogers et al. 2012 Evolution/Erickson et al. 2016 Evolution/Peichel et al. 2001 Nature/Glazer et al. 2015 G3                                                                                                                                                                       |
| groupI:21700000-21800000    | Alaska & Iceland & Scotland      | Jones et al 2012 Nature/Hohenlohe et al 2010 PLoS Genet/Conte et al. 2015 Genetics/Liu et al. 2014 G3/Rogers et al. 2012 Evolution/Erickson et al. 2016 Evolution/Peichel et al. 2001 Nature/Glazer et al. 2015 G3                                                                                                                                                                       |
| groupIV:12800000-12900000   | Alaska & Iceland & Scotland      | Jones et al 2012 Nature/Hohenlohe et al 2010 PLoS Genet/Arnegard et al. 2014 Nature/Conte et al. 2015 Genetics/Erickson et al. 2016 Evolution/Malek et al. 2012 Mol Ecol/Miller et al. 2014 Genetics/Rogers et al. 2012 Evolution/Berner et al. 2014 Evolution/Glazer et al. 2015 G3/Liu et al. 2014 G3/Wark et al. 2012 G3/Erickson et al. 2014 Proc R Soc B/Glazer et al. 2014 EvoDevo |
| groupI:8600000-8700000      | Alaska & Iceland                 | Arnegard et al. 2014 Nature/Conte et al. 2015 Genetics/Erickson et al. 2016 Evolution/Liu et al. 2014 G3/Miller et al. 2014 Genetics/Rogers et al. 2012 Evolution/Peichel et al. 2001 Nature/Glazer et al. 2015 G3                                                                                                                                                                       |
| groupI:21800000-21900000    | Alaska & Scotland                | Jones et al 2012 Nature/Hohenlohe et al 2010 PLoS Genet/Conte et al. 2015 Genetics/Liu et al. 2014 G3/Rogers et al. 2012 Evolution/Erickson et al. 2016 Evolution/Peichel et al. 2001 Nature/Glazer et al. 2015 G3                                                                                                                                                                       |
| groupIV:19800000-19900000   | Alaska & Iceland                 | Jones et al 2012 Nature/Hohenlohe et al 2010 PLoS Genet/Albert et al. 2008 Evolution/Arnegard et al. 2014 Nature/Conte et al. 2015 Genetics/Erickson et al. 2016 Evolution/Miller et al. 2014 Genetics/Rogers et al. 2012 Evolution/Liu et al. 2014 G3/Erickson et al. 2014 Proc R Soc B/Glazer et al. 2014 EvoDevo/Glazer et al. 2015 G3                                                |
| groupVIII:9300000-9400000   | Alaska & BC                      | Arnegard et al. 2014 Nature/Conte et al. 2015 Genetics/Miller et al. 2014 Genetics/Erickson et al. 2016 Evolution                                                                                                                                                                                                                                                                        |
| groupXI:5400000-5500000     | Alaska & BC                      | Hohenlohe et al 2010 PLoS Genet/Conte et al. 2015 Genetics/Arnegard et al. 2014 Nature/Berner et al. 2014 Evolution/Liu et al. 2014 G3/Miller et al. 2014 Genetics                                                                                                                                                                                                                       |
| groupXI:5500000-5600000     | Alaska & BC                      | Hohenlohe et al 2010 PLoS Genet/Conte et al. 2015 Genetics/Rogers et al. 2012 Evolution/Arnegard et al. 2014 Nature/Berner et al. 2014 Evolution/Liu et al. 2014 G3/Miller et al. 2014 Genetics                                                                                                                                                                                          |
| groupXI:5700000-5800000     | Alaska & BC                      | Hohenlohe et al 2010 PLoS Genet/Conte et al. 2015 Genetics/Rogers et al. 2012 Evolution/Arnegard et al. 2014 Nature/Berner et al. 2014 Evolution/Liu et al. 2014 G3/Miller et al. 2014 Genetics                                                                                                                                                                                          |
| scaffold-37:0-100000        | Alaska & BC                      | No                                                                                                                                                                                                                                                                                                                                                                                       |
| scaffold-37:100000-200000   | Alaska & BC                      | No                                                                                                                                                                                                                                                                                                                                                                                       |
| scaffold-37:200000-300000   | Alaska & BC                      | No                                                                                                                                                                                                                                                                                                                                                                                       |
| groupI:21500000-21600000    | Iceland & Scotland               | Jones et al 2012 Nature/Hohenlohe et al 2010 PLoS Genet/Conte et al. 2015 Genetics/Liu et al. 2014 G3/Rogers et al. 2012 Evolution/Erickson et al. 2016 Evolution/Peichel et al. 2001 Nature/Glazer et al. 2015 G3                                                                                                                                                                       |
| groupIV:23900000-24000000   | Iceland & Scotland               | Jones et al 2012 Nature/Hohenlohe et al 2010 PLoS Genet/Albert et al. 2008 Evolution/Arnegard et al. 2014 Nature/Conte et al. 2015 Genetics/Erickson et al. 2016 Evolution/Malek et al. 2012 Mol Ecol/Miller et al. 2014 Genetics/Rogers et al. 2012 Evolution/Glazer et al. 2014 EvoDevo/Glazer et al. 2015 G3                                                                          |
| groupXV:7100000-7200000     | Iceland & Scotland               | Albert et al. 2008 Evolution/Liu et al. 2014 G3/Miller et al. 2014 Genetics                                                                                                                                                                                                                                                                                                              |
| groupXX:200000-300000       | Iceland & Scotland               | No                                                                                                                                                                                                                                                                                                                                                                                       |
| scaffold-47:1600000-1700000 | Iceland & Scotland               | No                                                                                                                                                                                                                                                                                                                                                                                       |
| groupI:9300000-9400000      | Alaska                           | Arnegard et al. 2014 Nature/Conte et al. 2015 Genetics/Erickson et al. 2016 Evolution/Liu et al. 2014 G3/Miller et al. 2014 Genetics/Rogers et al. 2012 Evolution/Peichel et al. 2001 Nature/Glazer et al. 2015 G3                                                                                                                                                                       |
| groupII:4500000-4600000     | Alaska                           | Arnegard et al. 2014 Nature/Conte et al. 2015 Genetics/Rogers et al. 2012 Evolution/Miller et al. 2014 Genetics                                                                                                                                                                                                                                                                          |
| groupIV:10500000-10600000   | Alaska                           | Albert et al. 2008 Evolution/Arnegard et al. 2014 Nature/Conte et al. 2015 Genetics/Malek et al. 2012 Mol Ecol/Miller et al. 2014 Genetics/Rogers et al. 2012 Evolution/Colosimo et al. 2004 PLoS Biol/Shapiro et al. 2004 Nature/Erickson et al. 2014 Proc R Soc B/Erickson et al. 2016 Evolution/Glazer et al. 2014 EvoDevo/Glazer et al. 2015 G3                                      |

|                           |        |                                                                                                                                                                                                                                                                                                                                                                                            |
|---------------------------|--------|--------------------------------------------------------------------------------------------------------------------------------------------------------------------------------------------------------------------------------------------------------------------------------------------------------------------------------------------------------------------------------------------|
| groupIV:11000000-11100000 | Alaska | Albert et al. 2008 Evolution/Arnegard et al. 2014 Nature/Conte et al. 2015 Genetics/Malek et al. 2012 Mol Ecol/Miller et al. 2014 Genetics/Rogers et al. 2012 Evolution/Colosimo et al. 2004 PLoS Biol/Shapiro et al. 2004 Nature/Wark et al. 2012 G3/Erickson et al. 2014 Proc R Soc B/Erickson et al. 2016 Evolution/Glazer et al. 2014 EvoDevo/Glazer et al. 2015 G3                    |
| groupIV:11200000-11300000 | Alaska | Albert et al. 2008 Evolution/Arnegard et al. 2014 Nature/Conte et al. 2015 Genetics/Erickson et al. 2016 Evolution/Malek et al. 2012 Mol Ecol/Miller et al. 2014 Genetics/Rogers et al. 2012 Evolution/Colosimo et al. 2004 PLoS Biol/Shapiro et al. 2004 Nature/Wark et al. 2012 G3/Erickson et al. 2014 Proc R Soc B/Glazer et al. 2014 EvoDevo/Glazer et al. 2015 G3                    |
| groupIV:11600000-11700000 | Alaska | Albert et al. 2008 Evolution/Arnegard et al. 2014 Nature/Conte et al. 2015 Genetics/Erickson et al. 2016 Evolution/Malek et al. 2012 Mol Ecol/Miller et al. 2014 Genetics/Rogers et al. 2012 Evolution/Colosimo et al. 2004 PLoS Biol/Liu et al. 2014 G3/Shapiro et al. 2004 Nature/Wark et al. 2012 G3/Erickson et al. 2014 Proc R Soc B/Glazer et al. 2014 EvoDevo/Glazer et al. 2015 G3 |
| groupIV:12700000-12800000 | Alaska | Hohenlohe et al 2010 PLoS Genet/Arnegard et al. 2014 Nature/Conte et al. 2015 Genetics/Erickson et al. 2016 Evolution/Malek et al. 2012 Mol Ecol/Miller et al. 2014 Genetics/Rogers et al. 2012 Evolution/Berner et al. 2014 Evolution/Glazer et al. 2015 G3/Liu et al. 2014 G3/Wark et al. 2012 G3/Erickson et al. 2014 Proc R Soc B/Glazer et al. 2014 EvoDevo                           |
| groupIV:12900000-13000000 | Alaska | Hohenlohe et al 2010 PLoS Genet/Arnegard et al. 2014 Nature/Conte et al. 2015 Genetics/Erickson et al. 2016 Evolution/Malek et al. 2012 Mol Ecol/Miller et al. 2014 Genetics/Rogers et al. 2012 Evolution/Berner et al. 2014 Evolution/Glazer et al. 2015 G3/Liu et al. 2014 G3/Wark et al. 2012 G3/Erickson et al. 2014 Proc R Soc B/Glazer et al. 2014 EvoDevo                           |

---

**Supplementary Table 12.** Summary table with total number of 50kb windows associated with variables in 2 or more radiations. Numbers in the diagonal (scaled green [low] to red [high]) are numbers of genes associated with the same variable (i.e. parallel windows). Table also highlights the number of windows associated with multiple variables (scaled green [low] to red [high]).

| Traits/ variables |                | Environmental Variables |    |      |    |    |         |    | Body shape |       |       | Armour traits |     |     |    |    |    | Trophic traits |         |        |        |   |
|-------------------|----------------|-------------------------|----|------|----|----|---------|----|------------|-------|-------|---------------|-----|-----|----|----|----|----------------|---------|--------|--------|---|
|                   |                | MxF                     | Ca | Gyro | Na | pH | Schisto | Zn | Lake Area  | ShPC1 | ShPC2 | ShPC3         | DS1 | DS2 | PS | LP | HP | BAP            | Plate_N | Gill L | Gill N |   |
|                   | Marine - Fresh | 21                      | 2  | 0    | 1  | 2  | 0       | 0  | 0          | 0     | 0     | 0             | 0   | 0   | 1  | 1  | 1  | 0              | 1       | 0      | 1      |   |
| Environment       | Ca             | 0                       | 14 | 0    | 1  | 3  | 0       | 0  | 0          | 0     | 0     | 0             | 1   | 1   | 0  | 1  | 0  | 0              | 2       | 0      | 0      |   |
|                   | Gyro           | 0                       | 0  | 4    | 0  | 0  | 0       | 0  | 0          | 0     | 0     | 0             | 0   | 0   | 0  | 0  | 0  | 0              | 0       | 0      | 0      |   |
|                   | Na             | 0                       | 0  | 0    | 4  | 1  | 0       | 0  | 0          | 0     | 0     | 0             | 0   | 0   | 0  | 1  | 0  | 0              | 1       | 0      | 0      |   |
|                   | pH             | 0                       | 0  | 0    | 0  | 9  | 0       | 0  | 0          | 0     | 0     | 0             | 0   | 0   | 0  | 1  | 0  | 0              | 1       | 0      | 0      |   |
|                   | Schisto        | 0                       | 0  | 0    | 0  | 0  | 5       | 0  | 0          | 0     | 1     | 0             | 1   | 1   | 0  | 0  | 1  | 0              | 0       | 0      | 0      |   |
|                   | Zn             | 0                       | 0  | 0    | 0  | 0  | 0       | 3  | 0          | 0     | 0     | 0             | 0   | 0   | 0  | 0  | 0  | 0              | 0       | 0      | 0      |   |
|                   | Lake Area      | 0                       | 0  | 0    | 0  | 0  | 0       | 0  | 0          | 0     | 0     | 0             | 0   | 0   | 0  | 0  | 0  | 0              | 0       | 0      | 0      |   |
| Body Shape        | Shape_PC1      | 0                       | 0  | 0    | 0  | 0  | 0       | 0  | 2          | 0     | 0     | 0             | 1   | 0   | 0  | 0  | 0  | 0              | 0       | 0      | 0      |   |
|                   | Shape_PC2      | 0                       | 0  | 0    | 0  | 0  | 0       | 0  | 0          | 3     | 0     | 1             | 1   | 0   | 0  | 1  | 0  | 0              | 0       | 0      | 0      |   |
|                   | Shape_PC3      | 0                       | 0  | 0    | 0  | 0  | 0       | 0  | 0          | 0     | 2     | 0             | 0   | 0   | 0  | 0  | 0  | 0              | 0       | 0      | 0      |   |
| Armour            | DS1            | 0                       | 0  | 0    | 0  | 0  | 0       | 0  | 0          | 0     | 0     | 4             | 2   | 0   | 0  | 1  | 0  | 0              | 0       | 0      | 0      |   |
|                   | DS2            | 0                       | 0  | 0    | 0  | 0  | 0       | 0  | 0          | 0     | 0     | 0             | 7   | 0   | 0  | 1  | 0  | 0              | 0       | 0      | 0      |   |
|                   | PS             | 0                       | 0  | 0    | 0  | 0  | 0       | 0  | 0          | 0     | 0     | 0             | 0   | 11  | 1  | 2  | 0  | 0              | 0       | 0      | 1      |   |
|                   | LP             | 0                       | 0  | 0    | 0  | 0  | 0       | 0  | 0          | 0     | 0     | 0             | 0   | 0   | 11 | 1  | 0  | 1              | 0       | 0      | 0      |   |
|                   | HP             | 0                       | 0  | 0    | 0  | 0  | 0       | 0  | 0          | 0     | 0     | 0             | 0   | 0   | 0  | 3  | 0  | 0              | 0       | 0      | 0      |   |
|                   | BAP            | 0                       | 0  | 0    | 0  | 0  | 0       | 0  | 0          | 0     | 0     | 0             | 0   | 0   | 0  | 0  | 0  | 0              | 0       | 0      | 0      | 0 |
|                   | Plate_N        | 0                       | 0  | 0    | 0  | 0  | 0       | 0  | 0          | 0     | 0     | 0             | 0   | 0   | 0  | 0  | 0  | 0              | 11      | 0      | 0      |   |
| Trophic           | Gill_Raker_L   | 0                       | 0  | 0    | 0  | 0  | 0       | 0  | 0          | 0     | 0     | 0             | 0   | 0   | 0  | 0  | 0  | 0              | 0       | 3      | 0      |   |
|                   | Gill_Raker_N   | 0                       | 0  | 0    | 0  | 0  | 0       | 0  | 0          | 0     | 0     | 0             | 0   | 0   | 0  | 0  | 0  | 0              | 0       | 0      | 9      |   |

**Supplementary Table 13.** Regions of the genome associated with environmental variables in more than one radiation. Regions were pooled if associated windows were adjacent and associated in different radiations.

| Variable | Window ID                   | Radiations                  | Previous Marine - Fresh / QTL evidence?                                                                                                                           |
|----------|-----------------------------|-----------------------------|-------------------------------------------------------------------------------------------------------------------------------------------------------------------|
| Ca       | groupI:21550000-21800000    | Alaska & Iceland & Scotland | Jones et al 2012 Nature/Hohenlohe et al 2010 PLoS Genet/Conte et al. 2015 Genetics/Liu et al. 2014 G3/Rogers et al. 2012 Evolution/Erickson et al. 2016 Evolution |
| Ca       | groupIII:15000000-15100000  | Alaska & BC                 | Albert et al. 2008 Evolution/Miller et al. 2014 Genetics                                                                                                          |
| Ca       | groupIX:14800000-14850000   | BC & Scotland               | Arnegard et al. 2014 Nature/Rogers et al. 2012 Evolution/Liu et al. 2014 G3/Ellis et al. 2015 Development                                                         |
| Ca       | groupVII:14750000-14800000  | Alaska & BC                 | Hohenlohe et al 2010 PLoS Genet/Arnegard et al. 2014 Nature/Conte et al. 2015 Genetics/Miller et al. 2014 Genetics/Erickson et al. 2016 Evolution                 |
| Ca       | groupVII:17800000-17950000  | Alaska & BC                 | Hohenlohe et al 2010 PLoS Genet/Arnegard et al. 2014 Nature/Conte et al. 2015 Genetics/Miller et al. 2014 Genetics/Erickson et al. 2016 Evolution                 |
| Ca       | groupVIII:9400000-9450000   | Alaska & Iceland            | Arnegard et al. 2014 Nature/Conte et al. 2015 Genetics/Miller et al. 2014 Genetics/Erickson et al. 2016 Evolution                                                 |
| Ca       | groupX:3050000-3100000      | Alaska & BC                 | Miller et al. 2014 Genetics/Erickson et al. 2016 Evolution                                                                                                        |
| Ca       | groupXI:9000000-9100000     | Alaska & BC                 | Conte et al. 2015 Genetics/Rogers et al. 2012 Evolution/Arnegard et al. 2014 Nature/Liu et al. 2014 G3/Miller et al. 2014 Genetics/Peichel et al. 2014 Nature     |
| Ca       | groupXII:18050000-18150000  | BC & Scotland               | Liu et al. 2014 G3/Miller et al. 2014 Genetics                                                                                                                    |
| Ca       | groupXVI:13850000-13900000  | Alaska & BC                 | Albert et al. 2008 Evolution/Arnegard et al. 2014 Nature/Conte et al. 2015 Genetics/Liu et al. 2014 G3/Rogers et al. 2012 Evolution/Miller et al. 2014 Nature     |
| Ca       | groupXX:150000-200000       | Alaska & Iceland            | No                                                                                                                                                                |
| Ca       | groupXX:12900000-12950000   | Alaska & BC                 | Arnegard et al. 2014 Nature/Erickson et al. 2016 Evolution/Liu et al. 2014 G3/Miller et al. 2014 Genetics/Rogers et al. 2012 Evolution/Glazer et al. 2015 G3      |
| Ca       | groupXXI:7900000-7950000    | Alaska & Scotland           | Erickson et al. 2016 Evolution/Liu et al. 2014 G3/Ellis et al. 2015 Development/Erickson et al. 2014 Proc R Soc B/Miller et al. 2014 Genetics                     |
| Gyro     | groupIII:11600000-11700000  | BC & Iceland                | Erickson et al. 2016 Evolution/Conte et al. 2015 Genetics/Miller et al. 2014 Genetics                                                                             |
| Gyro     | groupVII:7800000-7850000    | BC & Scotland               | Arnegard et al. 2014 Nature/Conte et al. 2015 Genetics/Malek et al. 2012 Mol Ecol/Miller et al. 2014 Genetics/Colosimo et al. 2004 PLoS Biol                      |
| Gyro     | groupVII:7950000-8000000    | Alaska & BC                 | Arnegard et al. 2014 Nature/Conte et al. 2015 Genetics/Malek et al. 2012 Mol Ecol/Miller et al. 2014 Genetics/Colosimo et al. 2004 PLoS Biol                      |
| Gyro     | groupVII:21300000-21350000  | Alaska & BC                 | Arnegard et al. 2014 Nature/Conte et al. 2015 Genetics/Miller et al. 2014 Genetics/Erickson et al. 2016 Evolution/Glazer et al. 2015 G3/Liu et al. 2014 Nature    |
| Gyro     | groupVIII:10350000-10450000 | Alaska & Iceland            | Arnegard et al. 2014 Nature/Conte et al. 2015 Genetics/Miller et al. 2014 Genetics/Erickson et al. 2016 Evolution                                                 |
| Gyro     | groupVIII:19250000-19300000 | BC & Iceland                | Peichel et al. 2001 Nature                                                                                                                                        |
| Na       | groupI:21550000-21800000    | Iceland & Scotland          | Jones et al 2012 Nature/Hohenlohe et al 2010 PLoS Genet/Conte et al. 2015 Genetics/Liu et al. 2014 G3/Rogers et al. 2012 Evolution/Erickson et al. 2016 Evolution |
| Na       | groupIII:50000-150000       | Alaska & Iceland            | Conte et al. 2015 Genetics                                                                                                                                        |
| Na       | groupVII:17900000-17950000  | Alaska & BC                 | Hohenlohe et al 2010 PLoS Genet/Arnegard et al. 2014 Nature/Conte et al. 2015 Genetics/Miller et al. 2014 Genetics/Erickson et al. 2016 Evolution                 |



|         |                                  |                       |                                                                                                                                               |
|---------|----------------------------------|-----------------------|-----------------------------------------------------------------------------------------------------------------------------------------------|
| Na      | groupVIII:8250000-8300000        | BC & Scotland         | Hohenlohe et al 2010 PLoS Genet/Arnegard et al. 2014 Nature/Conte et al. 2015 Genetics/Miller et al. 2014 Genetics/Erickson et al. 2016 Ev    |
| Na      | groupXII:12150000-12250000       | Alaska & Scotland     | Albert et al. 2008 Evolution/Conte et al. 2015 Genetics/Liu et al. 2014 G3/Rogers et al. 2012 Evolution/Miller et al. 2014 Genetics           |
| Na      | groupXII:13050000-13250000       | Alaska & BC           | Albert et al. 2008 Evolution/Conte et al. 2015 Genetics/Liu et al. 2014 G3/Rogers et al. 2012 Evolution/Miller et al. 2014 Genetics           |
| Na      | groupXX:8950000-9050000          | Alaska & BC & Iceland | Albert et al. 2008 Evolution/Arnegard et al. 2014 Nature/Erickson et al. 2016 Evolution/Liu et al. 2014 G3/Miller et al. 2014 Genetics/Rogers |
| pH      | groupI:8550000-8650000           | Alaska & BC           | Arnegard et al. 2014 Nature/Conte et al. 2015 Genetics/Erickson et al. 2016 Evolution/Liu et al. 2014 G3/Miller et al. 2014 Genetics/Rogers e |
| pH      | groupI:21550000-21800000         | Iceland & Scotland    | Jones et al 2012 Nature/Hohenlohe et al 2010 PLoS Genet/Conte et al. 2015 Genetics/Liu et al. 2014 G3/Rogers et al. 2012 Evolution/Erickso    |
| pH      | groupIV:22100000-22250000        | Alaska & BC           | Arnegard et al. 2014 Nature/Conte et al. 2015 Genetics/Erickson et al. 2016 Evolution/Miller et al. 2014 Genetics/Rogers et al. 2012 Evolutio |
| pH      | groupIX:8400000-8450000          | BC & Iceland          | Arnegard et al. 2014 Nature/Rogers et al. 2012 Evolution/Miller et al. 2014 Genetics/Ellis et al. 2015 Development                            |
| pH      | groupIX:9300000-9350000          | BC & Iceland          | Arnegard et al. 2014 Nature/Rogers et al. 2012 Evolution/Berner et al. 2014 Evolution/Miller et al. 2014 Genetics/Ellis et al. 2015 Developme |
| pH      | groupVI:7650000-7750000          | Alaska & BC           | Arnegard et al. 2014 Nature                                                                                                                   |
| pH      | groupVI:8000000-8050000          | BC & Scotland         | Arnegard et al. 2014 Nature                                                                                                                   |
| pH      | groupVI:13950000-14000000        | Iceland & Scotland    | Arnegard et al. 2014 Nature/Erickson et al. 2016 Evolution                                                                                    |
| pH      | groupVII:26900000-<br>26950000   | Iceland & Scotland    | Arnegard et al. 2014 Nature/Rogers et al. 2012 Evolution/Cresko et al. 2004 PNAS/Liu et al. 2014 G3/Wark et al. 2012 G3/Miller et al. 2014 G  |
| pH      | groupXVIII:12200000-<br>12300000 | BC & Iceland          | Albert et al. 2008 Evolution/Arnegard et al. 2014 Nature/Miller et al. 2014 Genetics/Ellis et al. 2015 Development                            |
| pH      | groupXX:11700000-11800000        | BC & Iceland          | Arnegard et al. 2014 Nature/Erickson et al. 2016 Evolution/Liu et al. 2014 G3/Miller et al. 2014 Genetics/Rogers et al. 2012 Evolution/Glazer |
| pH      | groupXXI:2700000-2750000         | Alaska & BC           | Erickson et al. 2016 Evolution/Cleves et al. 2014 PNAS/Erickson et al. 2014 Proc R Soc B/Miller et al. 2014 Genetics                          |
| pH      | groupXXI:7900000-8000000         | Alaska & Scotland     | Erickson et al. 2016 Evolution/Liu et al. 2014 G3/Ellis et al. 2015 Development/Erickson et al. 2014 Proc R Soc B/Miller et al. 2014 Genetics |
| Schisto | groupIII:11550000-11650000       | Alaska & Iceland      | Erickson et al. 2016 Evolution/Conte et al. 2015 Genetics/Miller et al. 2014 Genetics                                                         |
| Schisto | groupIX:8550000-8600000          | BC & Iceland          | Arnegard et al. 2014 Nature/Rogers et al. 2012 Evolution/Miller et al. 2014 Genetics/Ellis et al. 2015 Development                            |
| Schisto | groupIX:14250000-14300000        | BC & Scotland         | Albert et al. 2008 Evolution/Arnegard et al. 2014 Nature/Rogers et al. 2012 Evolution/Liu et al. 2014 G3/Ellis et al. 2015 Development        |
| Schisto | groupIX:14650000-14750000        | Alaska & Scotland     | Albert et al. 2008 Evolution/Arnegard et al. 2014 Nature/Rogers et al. 2012 Evolution/Liu et al. 2014 G3/Ellis et al. 2015 Development        |
| Schisto | groupX:9250000-9300000           | Alaska & BC           | Liu et al. 2014 G3/Miller et al. 2014 Genetics/Erickson et al. 2016 Evolution/Glazer et al. 2015 G3                                           |
| Schisto | groupXVII:6550000-6650000        | Alaska & Iceland      | Arnegard et al. 2014 Nature/Conte et al. 2015 Genetics/Rogers et al. 2012 Evolution/Miller et al. 2014 Genetics/Ellis et al. 2015 Developmen  |
| Schisto | groupXVIII:6450000-6550000       | BC & Scotland         | Arnegard et al. 2014 Nature/Ellis et al. 2015 Development                                                                                     |
| Schisto | groupXX:3600000-3650000          | BC & Iceland          | Arnegard et al. 2014 Nature/Miller et al. 2014 Genetics/Colosimo et al. 2004 PLoS Biol/Rogers et al. 2012 Evolution/Cleves et al. 2014 PNAS/  |
| Schisto | scaffold_27:400000-450000        | Alaska & Iceland      | No                                                                                                                                            |
| Zn      | groupI:8550000-8600000           | Alaska & BC           | Arnegard et al. 2014 Nature/Conte et al. 2015 Genetics/Erickson et al. 2016 Evolution/Liu et al. 2014 G3/Miller et al. 2014 Genetics/Rogers e |
| Zn      | groupIV:19650000-19750000        | BC & Iceland          | Hohenlohe et al 2010 PLoS Genet/Albert et al. 2008 Evolution/Arnegard et al. 2014 Nature/Conte et al. 2015 Genetics/Erickson et al. 2016 Ev   |
| Zn      | groupIV:21200000-21300000        | Alaska & Iceland      | Arnegard et al. 2014 Nature/Conte et al. 2015 Genetics/Erickson et al. 2016 Evolution/Miller et al. 2014 Genetics/Rogers et al. 2012 Evolutio |

|           |                            |                    |                                                                                                                                                 |
|-----------|----------------------------|--------------------|-------------------------------------------------------------------------------------------------------------------------------------------------|
| Zn        | groupVII:6700000-6750000   | BC & Scotland      | Arnegard et al. 2014 Nature/Conte et al. 2015 Genetics/Malek et al. 2012 Mol Ecol/Miller et al. 2014 Genetics/Colosimo et al. 2004 PLoS Biol    |
| Zn        | groupXVII:4650000-4750000  | Iceland & Scotland | Arnegard et al. 2014 Nature/Conte et al. 2015 Genetics/Liu et al. 2014 G3/Rogers et al. 2012 Evolution/Miller et al. 2014 Genetics/Ellis et al. |
| Zn        | groupXVIII:9750000-9850000 | Alaska & Iceland   | Arnegard et al. 2014 Nature/Miller et al. 2014 Genetics/Ellis et al. 2015 Development                                                           |
| Lake_Area | groupIV:15400000-15500000  | Alaska & BC        | Arnegard et al. 2014 Nature/Conte et al. 2015 Genetics/Erickson et al. 2016 Evolution/Malek et al. 2012 Mol Ecol/Miller et al. 2014 Genetics,   |
| Lake_Area | groupVII:14950000-15050000 | Alaska & BC        | Hohenlohe et al 2010 PLoS Genet/Arnegard et al. 2014 Nature/Conte et al. 2015 Genetics/Miller et al. 2014 Genetics/Erickson et al. 2016 Ev      |
| Lake_Area | groupXII:13900000-14000000 | BC & Iceland       | Albert et al. 2008 Evolution/Conte et al. 2015 Genetics/Liu et al. 2014 G3/Rogers et al. 2012 Evolution/Miller et al. 2014 Genetics             |
| Lake_Area | groupXVI:10950000-11050000 | BC & Iceland       | Arnegard et al. 2014 Nature/Conte et al. 2015 Genetics/Liu et al. 2014 G3/Rogers et al. 2012 Evolution/Miller et al. 2014 Genetics/Erickson e   |
| Shape_PC1 | groupIV:13000000-13050000  | Alaska & Scotland  | Arnegard et al. 2014 Nature/Conte et al. 2015 Genetics/Erickson et al. 2016 Evolution/Malek et al. 2012 Mol Ecol/Miller et al. 2014 Genetics,   |
| Shape_PC1 | groupXI:650000-750000      | Alaska & BC        | No                                                                                                                                              |
| Shape_PC1 | scaffold_114:300000-350000 | BC & Iceland       | No                                                                                                                                              |
| Shape_PC2 | groupIII:8900000-9000000   | BC & Scotland      | No                                                                                                                                              |
| Shape_PC2 | groupIX:8550000-8600000    | Alaska & BC        | Arnegard et al. 2014 Nature/Rogers et al. 2012 Evolution                                                                                        |
| Shape_PC2 | groupV:9800000-9850000     | BC & Iceland       | Erickson et al. 2016 Evolution/Liu et al. 2014 G3                                                                                               |
| Shape_PC2 | groupVI:8700000-8750000    | Iceland & Scotland | Arnegard et al. 2014 Nature                                                                                                                     |
| Shape_PC2 | groupXII:12900000-13000000 | Alaska & Iceland   | Albert et al. 2008 Evolution/Conte et al. 2015 Genetics/Liu et al. 2014 G3/Rogers et al. 2012 Evolution                                         |
| Shape_PC2 | groupXIII:3750000-3850000  | BC & Iceland       | Arnegard et al. 2014 Nature/Conte et al. 2015 Genetics                                                                                          |
| Shape_PC3 | groupIX:17200000-17300000  | Iceland & Scotland | Arnegard et al. 2014 Nature/Rogers et al. 2012 Evolution                                                                                        |
| Shape_PC3 | groupVII:6250000-6300000   | Alaska & BC        | Arnegard et al. 2014 Nature/Conte et al. 2015 Genetics/Miller et al. 2014 Genetics                                                              |
| Shape_PC3 | groupVII:19600000-19650000 | BC & Iceland       | Arnegard et al. 2014 Nature/Conte et al. 2015 Genetics/Malek et al. 2012 Mol Ecol/Miller et al. 2014 Genetics                                   |
| DS1       | groupII:12500000-12600000  | Alaska & BC        | Conte et al. 2015 Genetics/Miller et al. 2014 Genetics                                                                                          |
| DS1       | groupIII:15000000-15050000 | BC & Iceland       | Miller et al. 2014 Genetics                                                                                                                     |
| DS1       | groupIV:12150000-12300000  | Alaska & Iceland   | Arnegard et al. 2014 Nature/Berner et al. 2014 Evolution/Colosimo et al. 2004 PLoS Biol/Erickson et al. 2016 Evolution/Glazer et al. 2015 G3/   |
| DS1       | groupIV:17950000-18050000  | Alaska & BC        | Arnegard et al. 2014 Nature/Erickson et al. 2016 Evolution/Liu et al. 2014 G3/Miller et al. 2014 Genetics/Rogers et al. 2012 Evolution          |
| DS1       | groupIV:18450000-18550000  | Alaska & BC        | Arnegard et al. 2014 Nature/Erickson et al. 2016 Evolution/Liu et al. 2014 G3/Miller et al. 2014 Genetics/Rogers et al. 2012 Evolution          |
| DS1       | groupIX:8550000-8600000    | Alaska & Scotland  | Miller et al. 2014 Genetics/Rogers et al. 2012 Evolution                                                                                        |
| DS1       | groupVII:11200000-11250000 | Iceland & Scotland | Conte et al. 2015 Genetics/Erickson et al. 2016 Evolution/Glazer et al. 2015 G3/Liu et al. 2014 G3/Miller et al. 2014 Genetics                  |
| DS1       | groupVIII:5400000-5500000  | Alaska & BC        | Miller et al. 2014 Genetics                                                                                                                     |
| DS1       | groupXI:6250000-6350000    | Alaska & BC        | Arnegard et al. 2014 Nature/Berner et al. 2014 Evolution/Liu et al. 2014 G3/Miller et al. 2014 Genetics                                         |

|     |                                                          |                         |                                                                                                                                                                                           |
|-----|----------------------------------------------------------|-------------------------|-------------------------------------------------------------------------------------------------------------------------------------------------------------------------------------------|
| DS1 | groupXIII:11850000-11900000                              | BC & Scotland           | Miller et al. 2014 Genetics/Peichel et al. 2001 Nature                                                                                                                                    |
| DS1 | groupXXI:6400000-6500000<br>scaffold_27:1600000-1700000  | Alaska & BC             | Erickson et al. 2016 Evolution                                                                                                                                                            |
| DS1 | groupI:7850000-7950000                                   | BC & Iceland            | No                                                                                                                                                                                        |
| DS2 | groupI:7850000-7950000                                   | Alaska & BC             | Erickson et al. 2016 Evolution/Peichel et al. 2001 Nature/Shapiro et al. 2004 Nature                                                                                                      |
| DS2 | groupIII:15000000-15050000                               | Iceland & Scotland      | Miller et al. 2014 Genetics                                                                                                                                                               |
| DS2 | groupIV:7850000-7900000                                  | Iceland & Scotland      | Arnegard et al. 2014 Nature/Miller et al. 2014 Genetics/Rogers et al. 2012 Evolution                                                                                                      |
| DS2 | groupIV:12250000-12300000                                | Alaska & BC             | Arnegard et al. 2014 Nature/Berner et al. 2014 Evolution/Colosimo et al. 2004 PLoS Biol/Erickson et al. 2016 Evolution/Glazer et al. 2015 G3/                                             |
| DS2 | groupIV:12950000-13050000                                | BC & Iceland & Scotland | Arnegard et al. 2014 Nature/Berner et al. 2014 Evolution/Erickson et al. 2016 Evolution/Glazer et al. 2015 G3/Liu et al. 2014 G3/Miller et al. 2014 Genetics/Rogers et al. 2012 Evolution |
| DS2 | groupIV:18450000-18550000                                | Alaska & BC             | Arnegard et al. 2014 Nature/Erickson et al. 2016 Evolution/Liu et al. 2014 G3/Miller et al. 2014 Genetics/Rogers et al. 2012 Evolution                                                    |
| DS2 | groupIX:8550000-8600000                                  | Alaska & Scotland       | Miller et al. 2014 Genetics/Rogers et al. 2012 Evolution                                                                                                                                  |
| DS2 | groupXI:7250000-7300000                                  | BC & Iceland            | Arnegard et al. 2014 Nature/Liu et al. 2014 G3/Miller et al. 2014 Genetics                                                                                                                |
| DS2 | groupXX:12500000-12550000<br>scaffold_27:1500000-1700000 | BC & Iceland            | Miller et al. 2014 Genetics/Rogers et al. 2012 Evolution                                                                                                                                  |
| DS2 | groupI:7400000-7600000                                   | Alaska & BC & Iceland   | Erickson et al. 2016 Evolution/Peichel et al. 2001 Nature/Shapiro et al. 2004 Nature                                                                                                      |
| PS  | groupI:11850000-11900000                                 | BC & Scotland           | Erickson et al. 2016 Evolution/Peichel et al. 2001 Nature                                                                                                                                 |
| PS  | groupI:12200000-12250000                                 | BC & Iceland            | Erickson et al. 2016 Evolution/Peichel et al. 2001 Nature                                                                                                                                 |
| PS  | groupII:11550000-11600000                                | Alaska & BC             | Conte et al. 2015 Genetics/Miller et al. 2014 Genetics                                                                                                                                    |
| PS  | groupII:14950000-15000000                                | Alaska & BC             | Conte et al. 2015 Genetics/Miller et al. 2014 Genetics                                                                                                                                    |
| PS  | groupIII:11600000-11700000                               | Alaska & BC             | Erickson et al. 2016 Evolution                                                                                                                                                            |
| PS  | groupIV:12200000-12300000                                | BC & Iceland            | Arnegard et al. 2014 Nature/Berner et al. 2014 Evolution/Colosimo et al. 2004 PLoS Biol/Erickson et al. 2016 Evolution/Glazer et al. 2015 G3/                                             |
| PS  | groupIV:15150000-15200000                                | BC & Scotland           | Arnegard et al. 2014 Nature/Cresko et al. 2004 PNAS/Erickson et al. 2016 Evolution/Liu et al. 2014 G3/Miller et al. 2014 Genetics/Rogers et al. 2012 Evolution                            |
| PS  | groupIV:19850000-19900000<br>groupVII:13500000-13600000  | Alaska & BC             | Arnegard et al. 2014 Nature/Liu et al. 2014 G3/Miller et al. 2014 Genetics/Rogers et al. 2012 Evolution                                                                                   |
| PS  | groupVII:16350000-16400000                               | Alaska & BC             | Conte et al. 2015 Genetics/Erickson et al. 2016 Evolution/Glazer et al. 2015 G3/Liu et al. 2014 G3/Miller et al. 2014 Genetics                                                            |
| PS  | groupVII:16350000-16400000                               | BC & Scotland           | Conte et al. 2015 Genetics/Erickson et al. 2016 Evolution/Glazer et al. 2015 G3/Liu et al. 2014 G3/Miller et al. 2014 Genetics                                                            |
| PS  | groupX:14450000-14550000                                 | Alaska & Scotland       | No                                                                                                                                                                                        |
| PS  | groupXI:6000000-6100000                                  | Alaska & Iceland        | Arnegard et al. 2014 Nature/Berner et al. 2014 Evolution/Liu et al. 2014 G3/Miller et al. 2014 Genetics                                                                                   |
| PS  | groupXII:14200000-14350000                               | Alaska & BC             | No                                                                                                                                                                                        |
| PS  | groupXVII:5400000-5450000                                | BC & Iceland            | Miller et al. 2014 Genetics                                                                                                                                                               |

|         |                             |                         |                                                                                                                                                 |
|---------|-----------------------------|-------------------------|-------------------------------------------------------------------------------------------------------------------------------------------------|
| PS      | groupXX:12500000-12600000   | Alaska & BC             | Miller et al. 2014 Genetics/Rogers et al. 2012 Evolution                                                                                        |
| PS      | groupXX:15750000-15800000   | Alaska & Iceland        | No                                                                                                                                              |
| PS      | groupXXI:6400000-6500000    | Alaska & BC             | Erickson et al. 2016 Evolution                                                                                                                  |
| PS      | scaffold_48:650000-750000   | Alaska & Iceland        | No                                                                                                                                              |
| LP      | groupI:21550000-21800000    | Alaska & Iceland        | Erickson et al. 2016 Evolution/Peichel et al. 2001 Nature                                                                                       |
| LP      | groupIII:11600000-11700000  | Alaska & BC & Iceland   | Erickson et al. 2016 Evolution                                                                                                                  |
| LP      | groupIV:12250000-12400000   | BC & Iceland & Scotland | Arnegard et al. 2014 Nature/Berner et al. 2014 Evolution/Colosimo et al. 2004 PLoS Biol/Erickson et al. 2016 Evolution/Glazer et al. 2015 G3/   |
| LP      | groupIV:14400000-14450000   | BC & Iceland & Scotland | Arnegard et al. 2014 Nature/Cresko et al. 2004 PNAS/Erickson et al. 2016 Evolution/Liu et al. 2014 G3/Miller et al. 2014 Genetics/Rogers et al. |
| LP      | groupIV:19850000-19900000   | Alaska & BC             | Arnegard et al. 2014 Nature/Liu et al. 2014 G3/Miller et al. 2014 Genetics/Rogers et al. 2012 Evolution                                         |
| LP      | groupIV:20000000-20050000   | Alaska & Scotland       | Arnegard et al. 2014 Nature/Colosimo et al. 2004 PLoS Biol/Liu et al. 2014 G3/Miller et al. 2014 Genetics/Rogers et al. 2012 Evolution          |
| LP      | groupIV:27250000-27300000   | Alaska & Scotland       | Arnegard et al. 2014 Nature/Erickson et al. 2016 Evolution/Miller et al. 2014 Genetics/Rogers et al. 2012 Evolution                             |
| LP      | groupV:6300000-6350000      | Alaska & Iceland        | Miller et al. 2014 Genetics                                                                                                                     |
| LP      | groupVII:13650000-13750000  | Alaska & BC             | Conte et al. 2015 Genetics/Erickson et al. 2016 Evolution/Glazer et al. 2015 G3/Liu et al. 2014 G3/Miller et al. 2014 Genetics                  |
| LP      | groupVII:15450000-15550000  | Alaska & BC             | Conte et al. 2015 Genetics/Erickson et al. 2016 Evolution/Glazer et al. 2015 G3/Liu et al. 2014 G3/Miller et al. 2014 Genetics                  |
| LP      | groupXI:6000000-6100000     | Alaska & BC             | Arnegard et al. 2014 Nature/Berner et al. 2014 Evolution/Liu et al. 2014 G3/Miller et al. 2014 Genetics                                         |
| LP      | groupXII:14150000-14350000  | Alaska & BC & Iceland   | No                                                                                                                                              |
| LP      | groupXIII:15550000-15650000 | Alaska & BC             | Miller et al. 2014 Genetics/Peichel et al. 2001 Nature/Rogers et al. 2012 Evolution                                                             |
| LP      | groupXXI:6400000-6500000    | Alaska & BC             | Erickson et al. 2016 Evolution                                                                                                                  |
| LP      | groupXXI:6550000-6650000    | Alaska & BC             | Erickson et al. 2016 Evolution/Liu et al. 2014 G3                                                                                               |
| HP      | groupIV:12950000-13050000   | Alaska & BC             | Arnegard et al. 2014 Nature/Berner et al. 2014 Evolution/Erickson et al. 2016 Evolution/Glazer et al. 2015 G3/Liu et al. 2014 G3/Miller et al.  |
| HP      | groupIV:19850000-19900000   | Alaska & BC             | Arnegard et al. 2014 Nature/Liu et al. 2014 G3/Miller et al. 2014 Genetics/Rogers et al. 2012 Evolution                                         |
| HP      | groupIX:8550000-8600000     | Iceland & Scotland      | Miller et al. 2014 Genetics/Rogers et al. 2012 Evolution                                                                                        |
| HP      | groupVII:18250000-18350000  | Alaska & BC             | Conte et al. 2015 Genetics/Erickson et al. 2016 Evolution/Glazer et al. 2015 G3/Liu et al. 2014 G3/Miller et al. 2014 Genetics                  |
| HP      | groupXVII:5400000-5450000   | BC & Iceland            | Miller et al. 2014 Genetics                                                                                                                     |
| HP      | groupXVII:12500000-12600000 | Alaska & Scotland       | Miller et al. 2014 Genetics                                                                                                                     |
| BAP     | groupII:5550000-5650000     | Alaska & Scotland       | Conte et al. 2015 Genetics/Miller et al. 2014 Genetics                                                                                          |
| BAP     | groupVIII:9750000-9850000   | BC & Scotland           | Erickson et al. 2016 Evolution/Miller et al. 2014 Genetics                                                                                      |
| Plate_N | groupI:11850000-12050000    | Alaska & BC             | Erickson et al. 2016 Evolution/Peichel et al. 2001 Nature                                                                                       |

|              |                            |                       |                                                                                                                                                              |
|--------------|----------------------------|-----------------------|--------------------------------------------------------------------------------------------------------------------------------------------------------------|
| Plate_N      | groupI:21550000-21800000   | Iceland & Scotland    | Erickson et al. 2016 Evolution/Peichel et al. 2001 Nature                                                                                                    |
| Plate_N      | groupIV:9750000-9800000    | Alaska & BC           | Arnegard et al. 2014 Nature/Miller et al. 2014 Genetics/Rogers et al. 2012 Evolution                                                                         |
| Plate_N      | groupIV:12750000-12850000  | Alaska & BC & Iceland | Arnegard et al. 2014 Nature/Berner et al. 2014 Evolution/Erickson et al. 2016 Evolution/Glazer et al. 2015 G3/Liu et al. 2014 G3/Miller et al. 2014 Genetics |
| Plate_N      | groupIV:13450000-13500000  | Alaska & BC           | Arnegard et al. 2014 Nature/Berner et al. 2014 Evolution/Erickson et al. 2016 Evolution/Glazer et al. 2015 G3/Liu et al. 2014 G3/Miller et al. 2014 Genetics |
| Plate_N      | groupIV:19800000-19950000  | Alaska & BC           | Arnegard et al. 2014 Nature/Liu et al. 2014 G3/Miller et al. 2014 Genetics/Rogers et al. 2012 Evolution                                                      |
| Plate_N      | groupIV:23900000-24000000  | BC & Iceland          | Arnegard et al. 2014 Nature/Miller et al. 2014 Genetics/Rogers et al. 2012 Evolution                                                                         |
| Plate_N      | groupIV:25550000-25600000  | Alaska & BC           | Arnegard et al. 2014 Nature/Erickson et al. 2016 Evolution/Miller et al. 2014 Genetics/Rogers et al. 2012 Evolution                                          |
| Plate_N      | groupVII:14300000-14450000 | Alaska & BC           | Conte et al. 2015 Genetics/Erickson et al. 2016 Evolution/Glazer et al. 2015 G3/Liu et al. 2014 G3/Miller et al. 2014 Genetics                               |
| Plate_N      | groupVII:15450000-15550000 | Alaska & BC           | Conte et al. 2015 Genetics/Erickson et al. 2016 Evolution/Glazer et al. 2015 G3/Liu et al. 2014 G3/Miller et al. 2014 Genetics                               |
| Plate_N      | groupVIII:9400000-9500000  | BC & Iceland          | Erickson et al. 2016 Evolution/Miller et al. 2014 Genetics                                                                                                   |
| Plate_N      | groupXII:12700000-12800000 | Alaska & BC           | No                                                                                                                                                           |
| Plate_N      | groupXX:150000-200000      | BC & Iceland          | No                                                                                                                                                           |
| Plate_N      | groupXX:6150000-6200000    | Alaska & BC           | Miller et al. 2014 Genetics/Rogers et al. 2012 Evolution                                                                                                     |
| Gill_Raker_L | groupIII:5350000-5400000   | Alaska & Iceland      | Conte et al. 2015 Genetics/Miller et al. 2014 Genetics                                                                                                       |
| Gill_Raker_L | groupIV:11800000-11850000  | BC & Scotland         | Arnegard et al. 2014 Nature/Erickson et al. 2014 Proc R Soc B/Erickson et al. 2016 Evolution/Glazer et al. 2014 EvoDevo/Glazer et al. 2015 G3                |
| Gill_Raker_L | groupIX:14500000-14600000  | Alaska & BC           | Arnegard et al. 2014 Nature/Ellis et al. 2015 Development/Rogers et al. 2012 Evolution                                                                       |
| Gill_Raker_L | groupVII:15000000-15050000 | Alaska & BC           | Arnegard et al. 2014 Nature/Conte et al. 2015 Genetics/Erickson et al. 2016 Evolution/Miller et al. 2014 Genetics                                            |
| Gill_Raker_N | groupIII:10400000-10450000 | Alaska & BC           | Conte et al. 2015 Genetics/Erickson et al. 2016 Evolution/Miller et al. 2014 Genetics                                                                        |
| Gill_Raker_N | groupIV:13350000-13400000  | Alaska & BC           | Arnegard et al. 2014 Nature/Erickson et al. 2014 Proc R Soc B/Erickson et al. 2016 Evolution/Glazer et al. 2014 EvoDevo/Glazer et al. 2015 G3                |
| Gill_Raker_N | groupIV:14150000-14250000  | Alaska & BC           | Arnegard et al. 2014 Nature/Cleves et al. 2014 PNAS/Erickson et al. 2014 Proc R Soc B/Erickson et al. 2016 Evolution/Glazer et al. 2014 EvoDevo              |
| Gill_Raker_N | groupIV:21400000-21500000  | Alaska & BC           | Arnegard et al. 2014 Nature/Erickson et al. 2016 Evolution/Glazer et al. 2014 EvoDevo/Glazer et al. 2015 G3/Miller et al. 2014 Genetics                      |
| Gill_Raker_N | groupIX:8350000-8450000    | Iceland & Scotland    | Ellis et al. 2015 Development/Rogers et al. 2012 Evolution                                                                                                   |
| Gill_Raker_N | groupVII:14650000-14750000 | Alaska & BC           | Arnegard et al. 2014 Nature/Conte et al. 2015 Genetics/Erickson et al. 2016 Evolution/Miller et al. 2014 Genetics                                            |
| Gill_Raker_N | groupX:14500000-14550000   | Alaska & BC           | Rogers et al. 2012 Evolution                                                                                                                                 |
| Gill_Raker_N | groupXV:7150000-7200000    | Iceland & Scotland    | Miller et al. 2014 Genetics                                                                                                                                  |
| Gill_Raker_N | groupXXI:6100000-6200000   | Alaska & BC           | Ellis et al. 2015 Development/Erickson et al. 2014 Proc R Soc B/Erickson et al. 2016 Evolution/Miller et al. 2014 Genetics                                   |
| Gill_Raker_N | scaffold_47:100000-200000  | BC & Scotland         | No                                                                                                                                                           |

**Supplementary Table 14.** Counts of windows (associated and non-associated with variables) included in the analysis. Columns represent Venn segments denoting windows common to all combinations of radiations.

| Groupings                   | Window Size |       |        |        |        |
|-----------------------------|-------------|-------|--------|--------|--------|
|                             | 50 kb       | 75 kb | 100 kb | 200 kb | 0.1 cM |
| All 4                       | 4868        | 4085  | 3536   | 2163   | 3711   |
| Alaska & BC & Iceland       | 244         | 142   | 83     | 20     | 210    |
| Alaska & BC & Scotland      | 220         | 141   | 80     | 20     | 187    |
| Alaska & Iceland & Scotland | 150         | 100   | 58     | 18     | 138    |
| BC & Iceland & Scotland     | 301         | 177   | 126    | 33     | 215    |
| Alaska & BC                 | 494         | 274   | 141    | 32     | 498    |
| Alaska & Iceland            | 23          | 19    | 6      | 4      | 25     |
| Alaska & Scotland           | 24          | 15    | 4      | 2      | 17     |
| BC & Iceland                | 42          | 22    | 13     | 2      | 35     |
| BC & Scotland               | 59          | 33    | 18     | 5      | 29     |
| Iceland & Scotland          | 383         | 216   | 135    | 52     | 361    |
| Alaska                      | 95          | 51    | 36     | 24     | 83     |
| BC                          | 158         | 82    | 57     | 12     | 111    |
| Iceland                     | 94          | 53    | 31     | 19     | 69     |
| Scotland                    | 92          | 52    | 24     | 7      | 97     |
| Total                       | 7247        | 5462  | 4348   | 2413   | 5786   |

### Supplementary Dataset 1 (separate file)

All Bayenv2 associated windows for window sizes of a)50kb, b)75kb, c)100kb, d)200kb) and e)0.1cM. Chromosome/ scaffold where the window is located, base pair numbers at start and end of the window, Ensembl ID, the name of the radiation(s) and the associated variable / trait. Full names of traits / variables can be found in Figure 3.

### Supplementary Dataset 2 (separate file)

Genes located in Bayenv2 associated windows along with GO information from Biomart. From left to right: Ensembl ID of the gene, gene common name, GO Term, GO name, 50kb window where gene is located, radiation and variables that are associated with windows where gene is located.

### Supplementary Dataset 3 (separate file)

Summary table with details of each individual analysed (from left to right): sample code name, country of collection, year sample was collected in, code name for lake where sample was collected, sex, weight and standard length of each individual, RAD tag code and number of reads retained.

## References

1. Roesti, M., Moser D., Berner, D. Recombination in the threespine stickleback genome— patterns and consequences. *Mol Ecol* **22**, 3014-27(2013).
2. Giles, N. Behavioural effects of the parasite *Schistocephalus solidus* (Cestoda) on an intermediate host the three-spined stickleback *Gasterosteus aculeatus* L. *Anim Behav* **31**, 1192-1194 (1983).
3. Spence, R., Wootton, R.J., Barber, I., Przybylski, M., Smith, C. Ecological causes of morphological evolution in the three-spined stickleback *Ecol Evol* **3**, 1717-1726 (2013).
4. Magalhaes, I.S., D'Agostino, D, Hohenlohe, P.A., MacColl, A.D. The ecology of an adaptive radiation of three-spined stickleback from North Uist Scotland *Mol. Ecol.* **25**, 4319-4336 (2016).
5. Reimchen, T.E. Incidence and intensity of *Cyathocephalus truncatus* and *Schistocephalus solidus* infection in *Gasterosteus aculeatus* *Canadian J of Zool* **60**, 1091-1095 (1982).
6. MacColl, A.D.C. Parasite burdens differ between sympatric three-spined stickleback species *Ecography* **32**, 153-160 (2009).
7. Stutz, W.E., Lau, O.L., Bolnick, D.I. Contrasting patterns of phenotype-dependent parasitism within and among populations of threespine stickleback *Am. Nat.* **183**, 810-825 (2014).
8. Bell, M.A., Foster S.A. *The evolutionary biology of the threespine stickleback* (Oxford University Press, 1994).
9. Rohlf, F.J., Marcus L.F. A revolution in morphometrics *Trends Ecol Evol* **8**, 129-132 (1993).
10. Rohlf, F.J. tpsDig digitize landmarks and outlines version 216 (Department of Ecology and Evolution State University of New York at Stony Brook NJ) (2010).
11. Rohlf, F.J. tpsUtil file utility program version 146 (Department of Ecology and Evolution State University of New York at Stony Brook NJ) (2010).
12. Klingenberg, C.P. MorphoJ: an integrated software package for geometric morphometrics *Mol. Ecol. Resources* **11**, 353-357 (2011).
13. Dryden IL, Mardia KV *Statistical analysis of shape* (Wiley, 1998).
14. Zelditch, M.L., Swiderski, D.L., Sheets, D.H., Fink, W.L. *Geometric morphometrics for biologists: a primer* (Elsevier Academic Press, 2004).

15. Klingenberg, C.P. Evolution and development of shape: integrating quantitative approaches *Nature Reviews Genetics* **11**, 623-635 (2010).
16. Loy, A., Cataudella S., Corti M. Shape changes during the growth of the Sea Bass *Dicentrarchus labrax* (Teleostea: Perciformes) in relation to different rearing conditions: An application of thin-plate spline regression analysis *NATO ASI series A Life Sciences* **284**, 399-406 (1996).
17. Etter, P.D. *et al.* Local de novo assembly of RAD paired-end contigs using short sequencing reads *PloS One* **6**, e18561 (2011).
18. Ali, O.A. *et al* RAD capture (Rapture): flexible and efficient sequence-based genotyping *Genetics* **202**, 389-400 (2016).
19. Wu, T.D., Nacu S Fast and SNP-tolerant detection of complex variants and splicing in short reads *Bioinformatics* **26**, 873–881 (2010).
20. Lischer, H.E.L., Excoffier, L. PGDSpider: An automated data conversion tool for connecting population genetics and genomics programs *Bioinformatics* **28**, 298-299 (2012).
